# Supplementary material
Source: publisher figshare collection journal article supplement (https://tandf.figshare.com/ndownloader/files/22643564)
Supplement: Supplementary file 1 [file 22643564]

Synthesis, characterization and antitumor activities of some novel thiazinones and thiosemicarbazones derivatives

Selvam Athavan Alias Anand,a Kiran George,b Nisha Susan Thomas,c and Senthamaraikannan Kabilan*,a

aDrug Discovery Lab, Department of Chemistry, Annamalai University, Annamalainagar, Tamilnadu – 608002, India.

bDepartment of Biomedical Engineering, Chennai Institute of Technology, Chennai, Tamilnadu – 600069, India.

cDepartment of Bio-Chemistry and Bio-Technology, Annamalai University, Annamalainagar, Tamilnadu – 608002, India.

Email: profskabilanau@gmail.com

**Supplemental Materials**

**General procedure for the synthesis of substituted azabicyclo[3.3.1]nonan-9-ones (Ia-If) and piperidin-4-ones (IIb-IIg)**

A mixture of substituted benzaldehydes (2.0 mmol), appropriate ketones (1.0 mmol) and ammonium acetate or methyl amine (1.0 mmol) in ethanol (30 mL) was heated at 60 ºC for 5 mins. The mixture was kept at room temperature for 12 h. Diethyl ether (40 mL) was added followed by concentrated hydrochloric acid (25 mL) and cooled in ice water. The hydrochloride salt precipitated was filtered and washed with ethanol:ether (1:5, 20 mL) mixture. The washed salt was suspended in acetone (10 mL) and the liquid ammonia (5 mL) was added dropwise to make it alkaline. The precipitate formed on dilution with distilled water was filtered, dried and recrystallised from absolute ethanol.

**General procedure for the synthesis of azabicyclo[3.3.1]nonan-9-ones thiosemicarbazones (Ig-Il).**

To the completely dissolved solution of substituted 2,4-diaryl-3-azabicyclo[3.3.1]nonan-9-ones (1.0 mmol) in methanol (20 mL), concentrated hydrochloric acid (0.2 mL) and a methanolic solution of thiosemicarbazide (1.0 mmol, 10 mL) were added dropwise with stirring. The reaction mixture was refluxed with water condenser for 2 h. After completion, the reaction mixture was cooled to room temperature and the solid separated was filtered. The crude product was recrystallised from methanol.

**Synthesis of N-(4-chlorophenyl)hydrazinecarbothioamide (IIa)**

To a solution of 4-chloroaniline (10 mmol) in dimethylformamide (10 mL) sodium hydroxide (14 mmol) and carbon disulphide (10 mmol) were added. The mixture was stirred at 30-35 C for 1 h. To the stirred mixture, hydrazine hydrate (30 mmol) was added and stirring continued at 70-80 C for 1.5 h. The mixture was cooled to room temperature and diluted with distilled water (40 mL). The solid thrown out was filtered, dried and recrystallized from absolute ethanol.


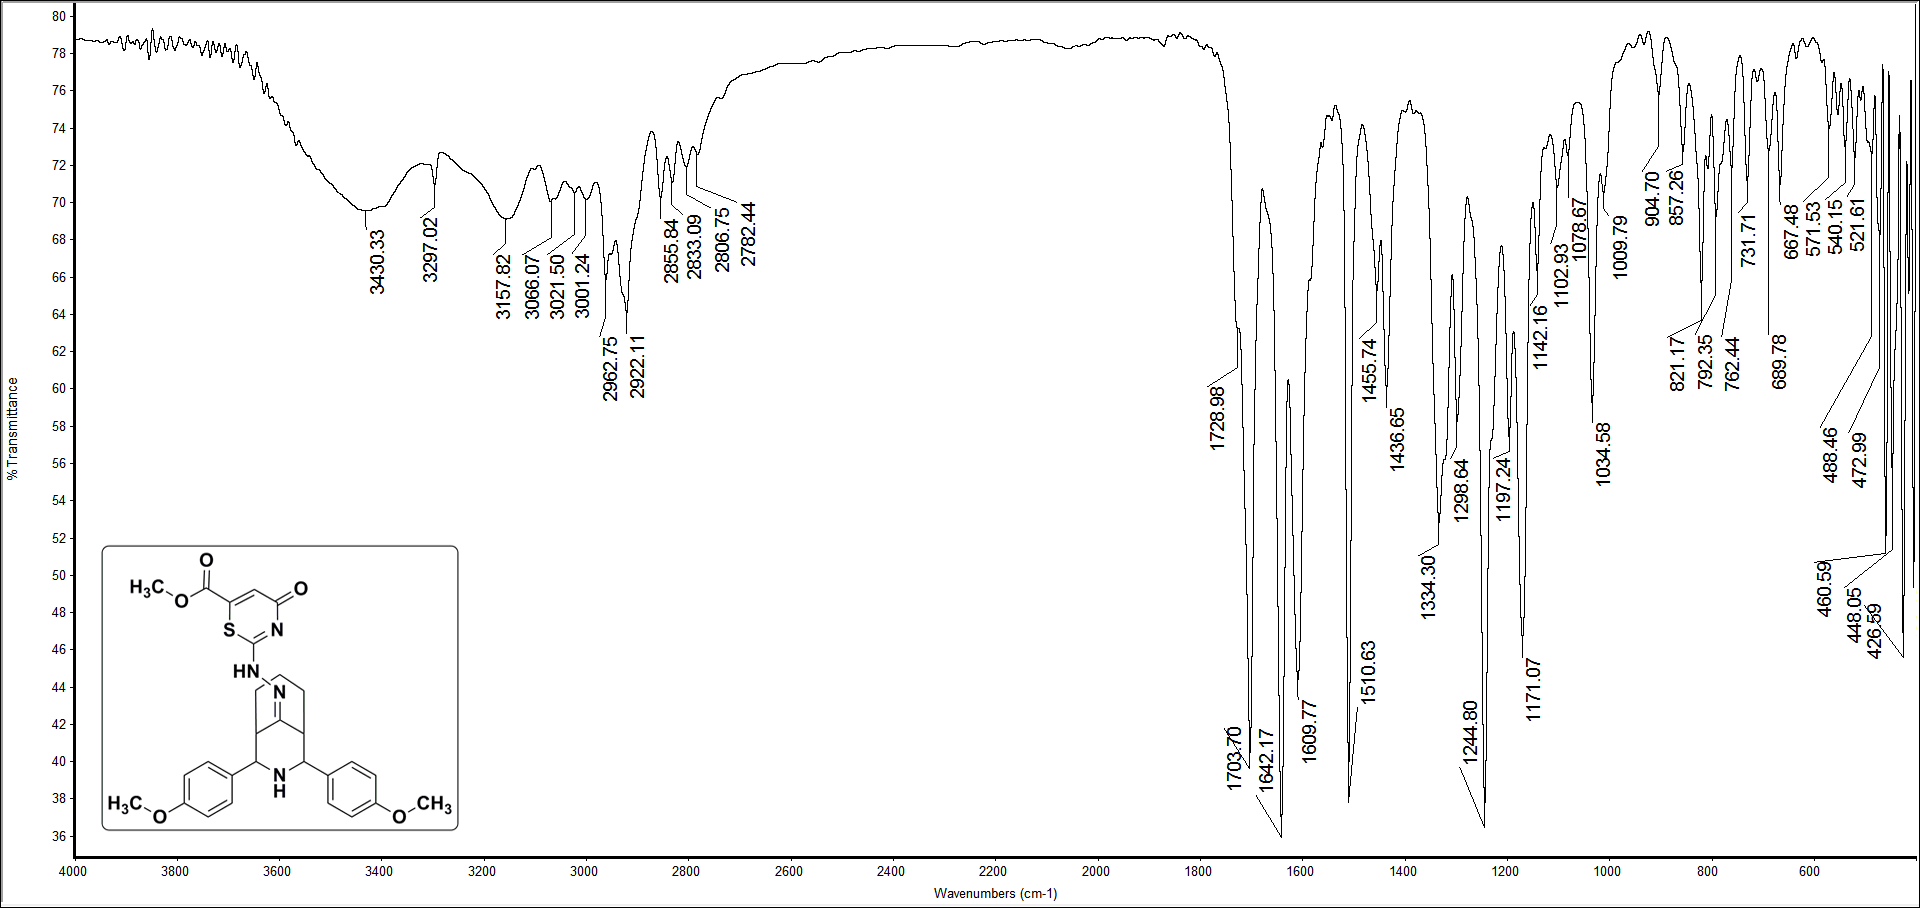


**Figure S 1:** FTIR spectrum of compound **1**


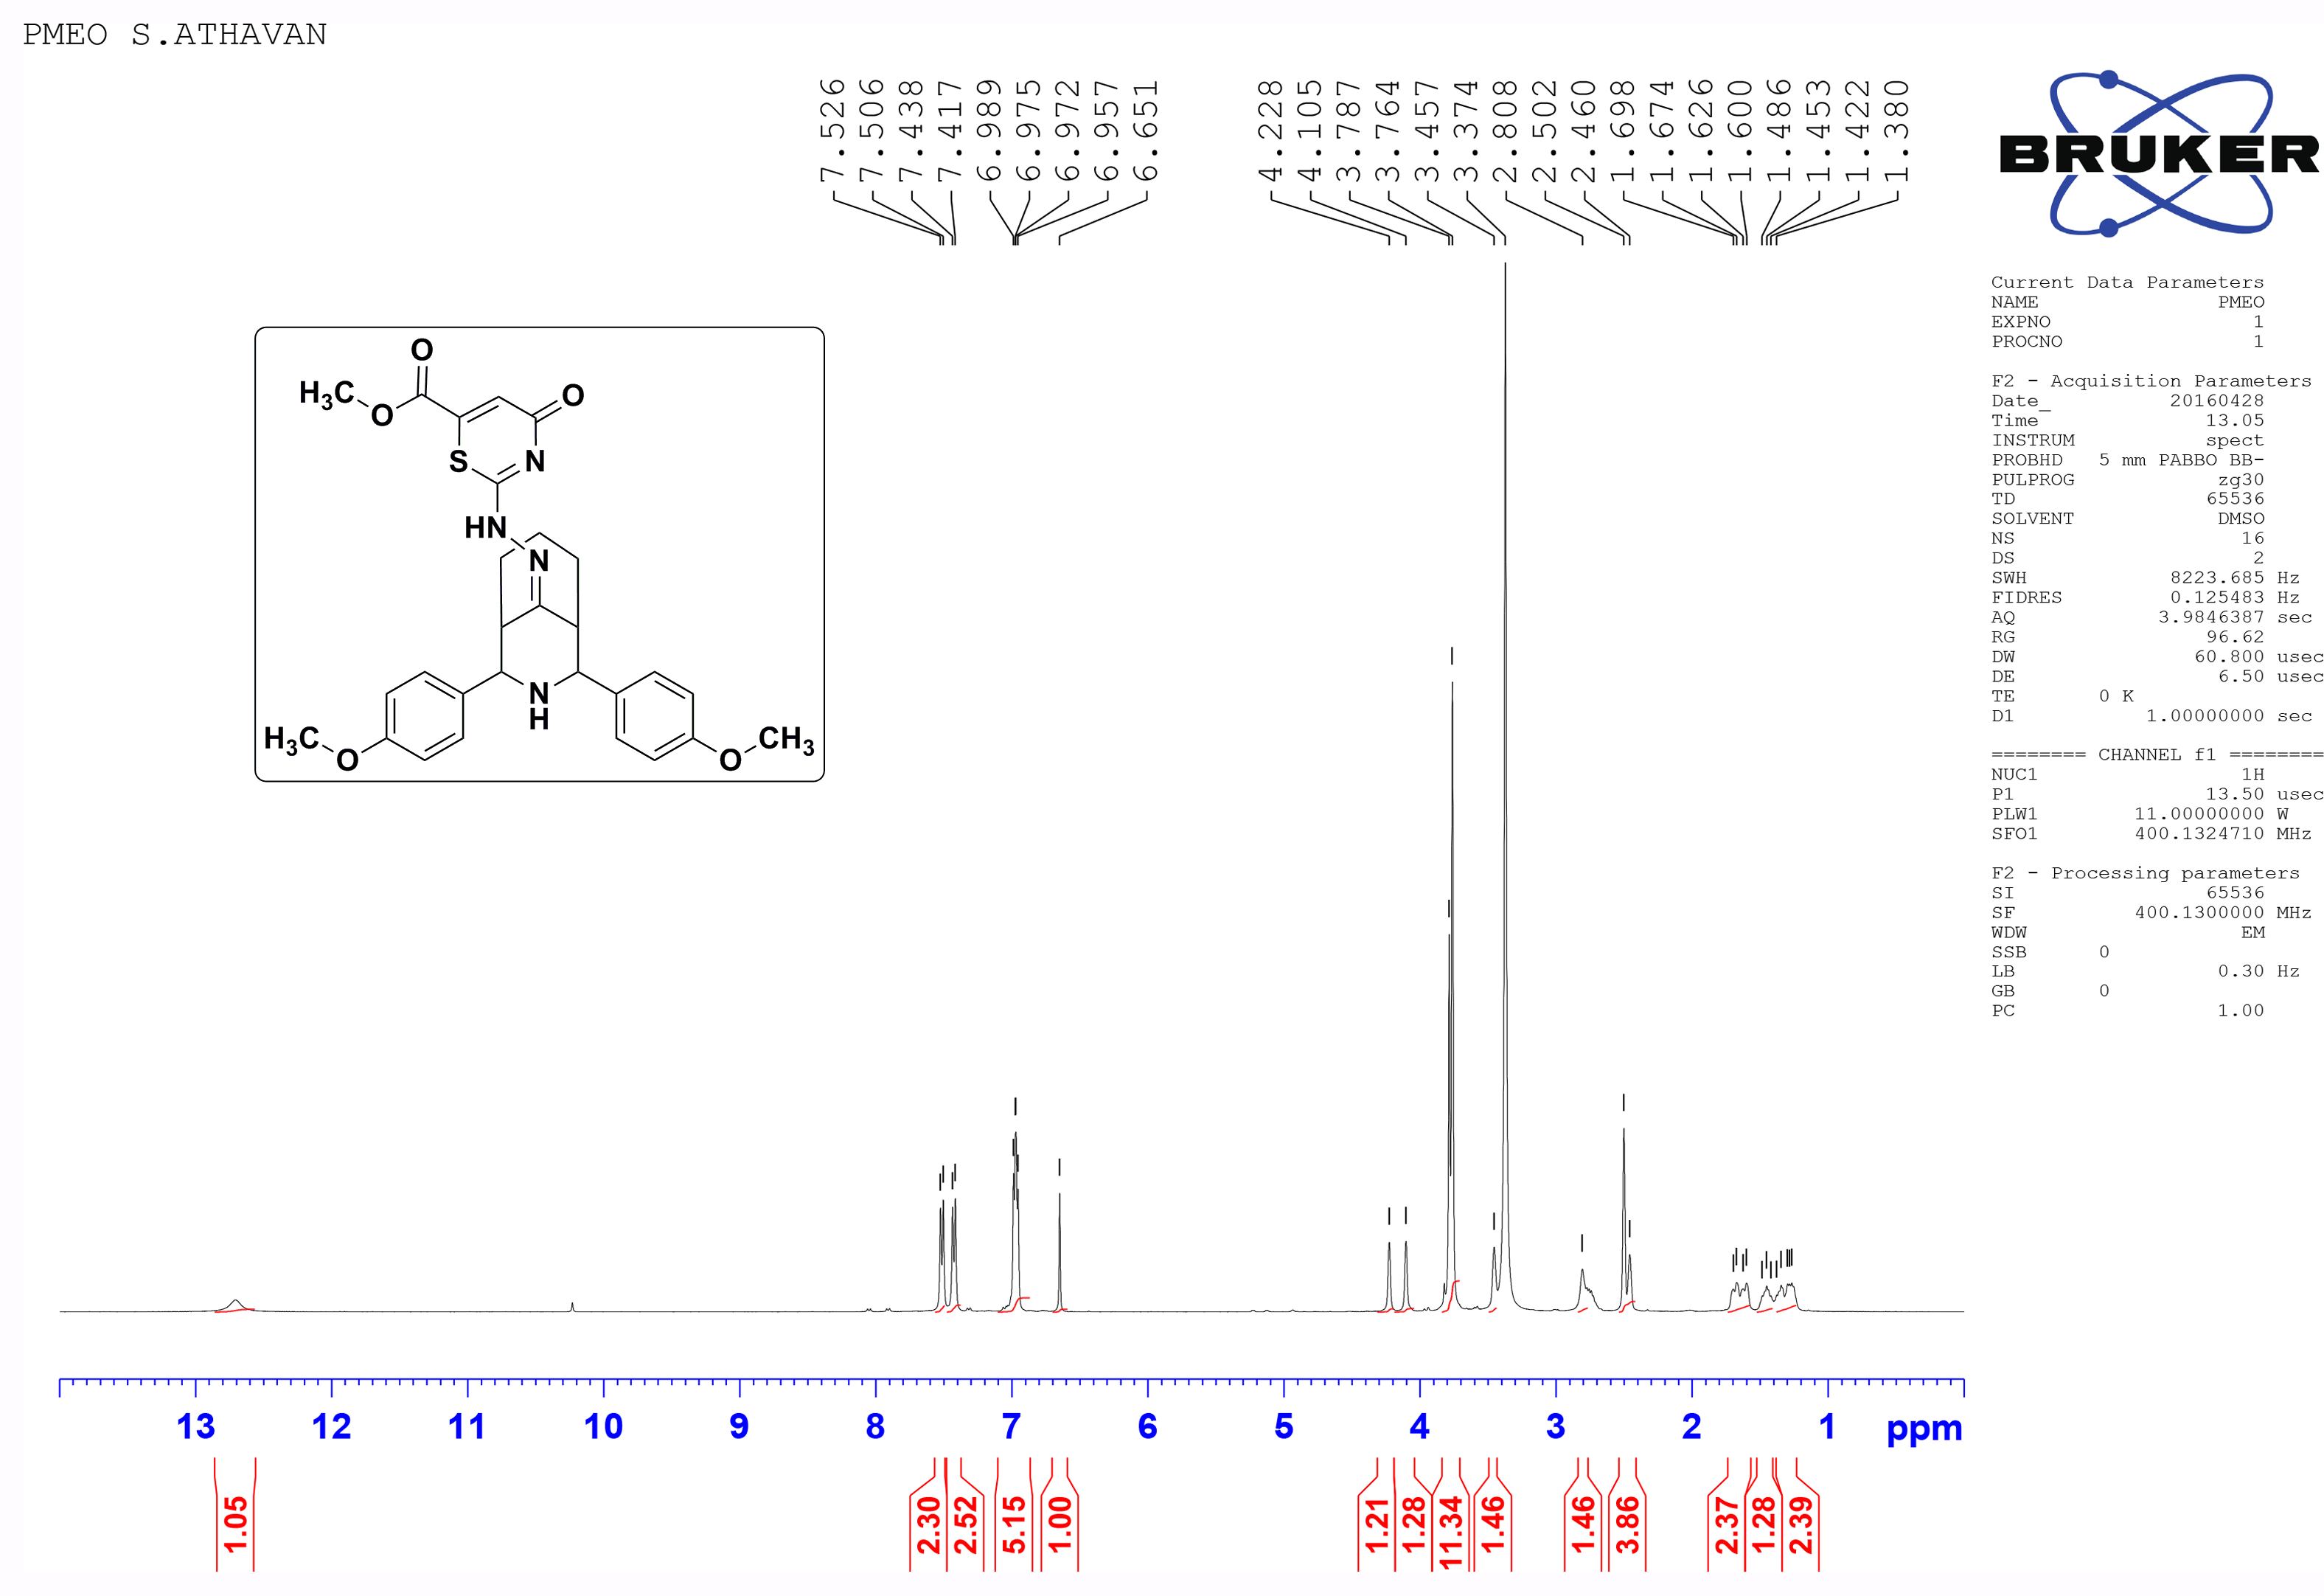


**Figure S 2:** 1H NMR of compound **1**


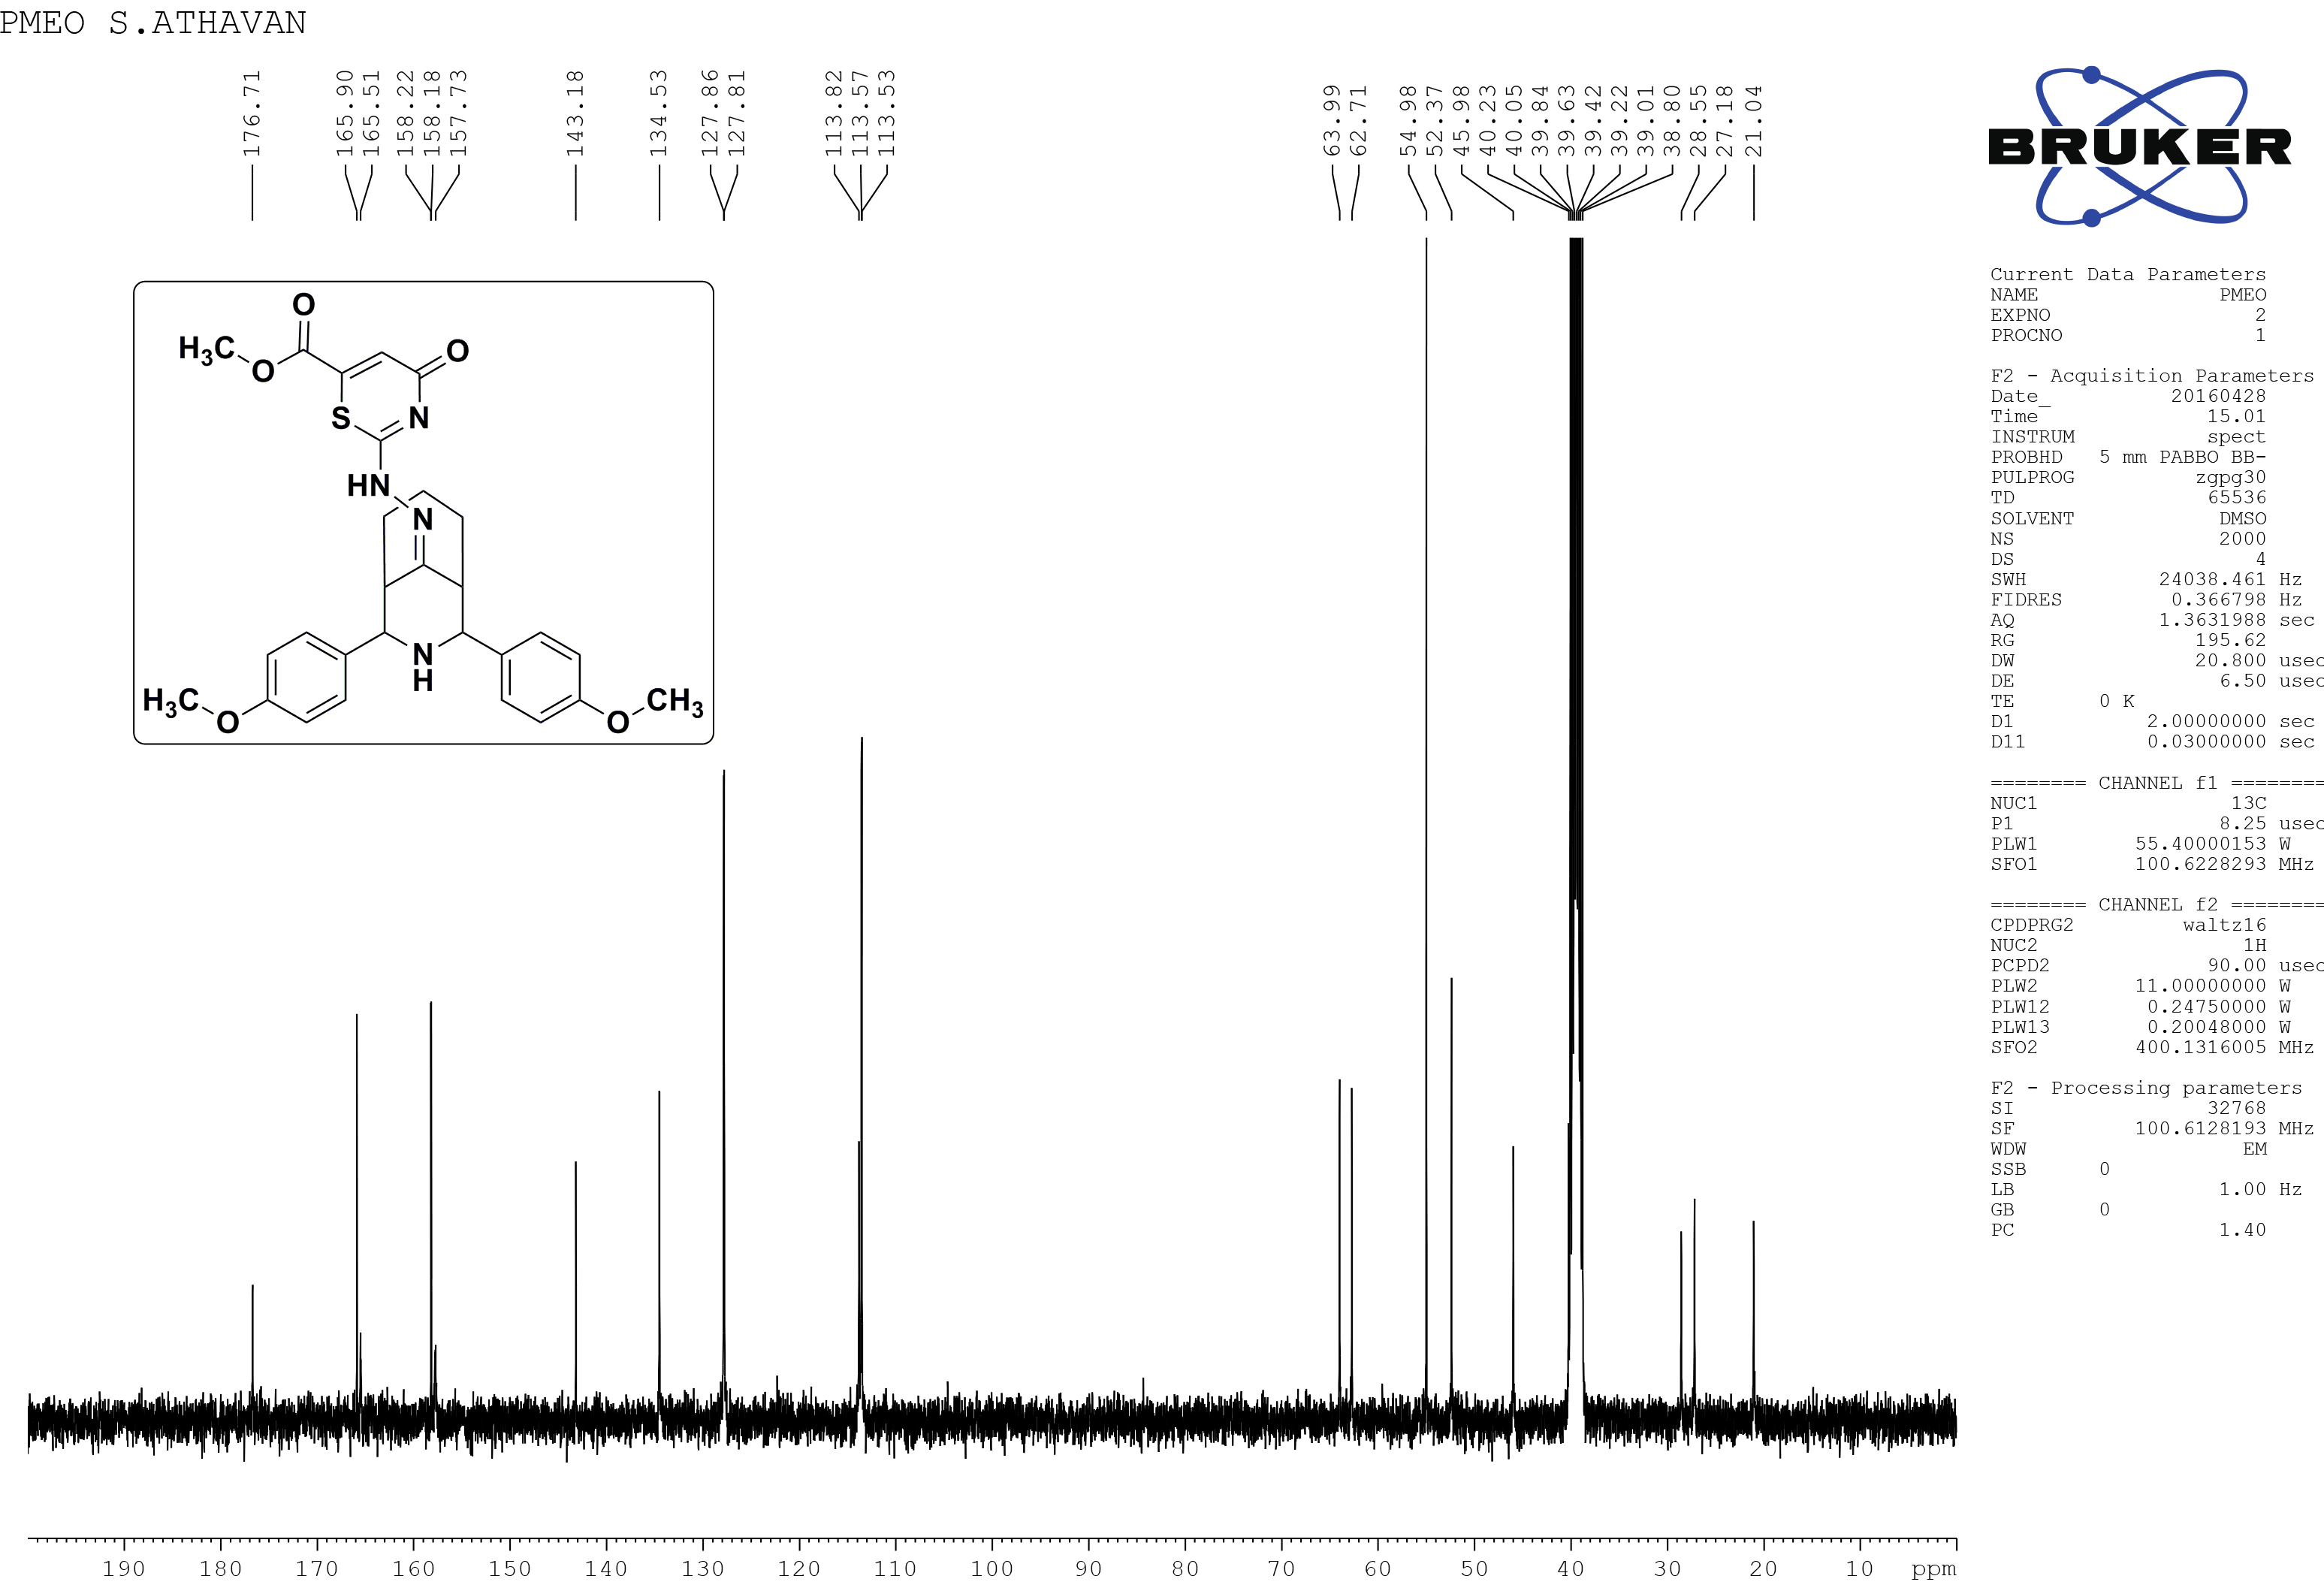


**Figure S 3:** 13C NMR of compound **1**


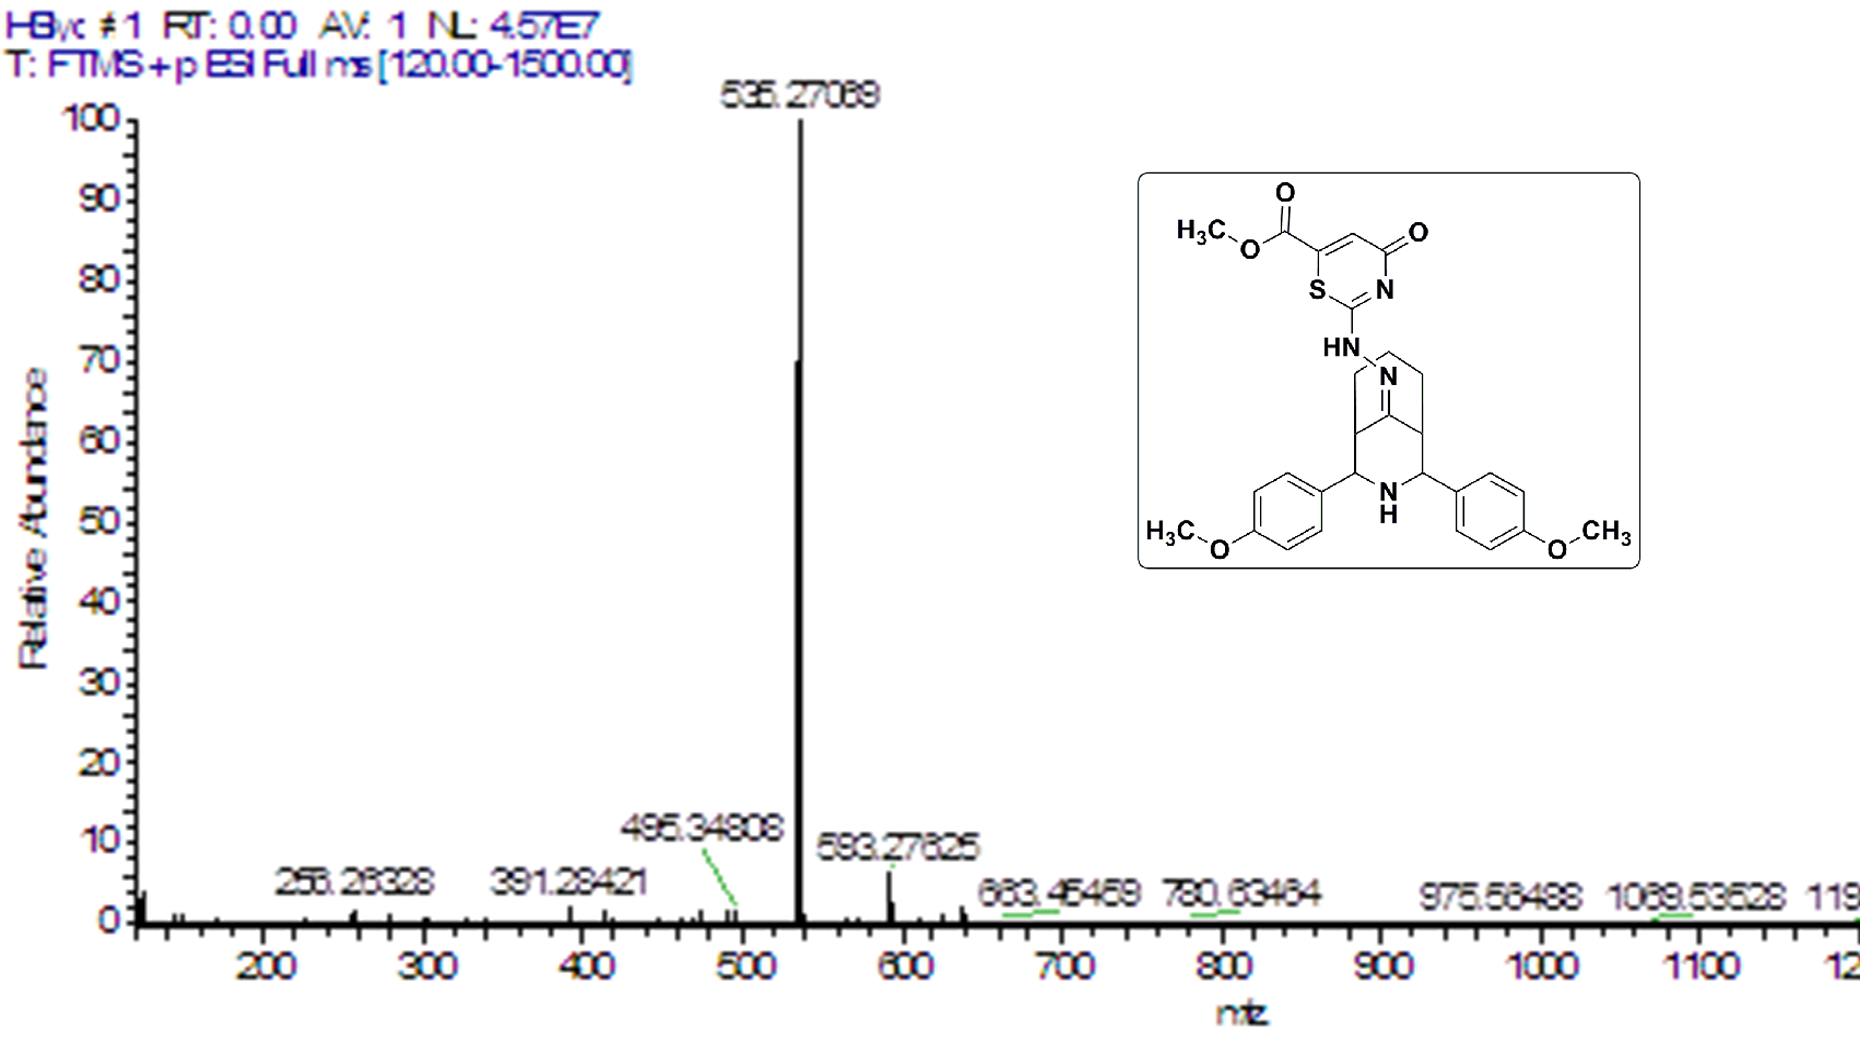


**Figure S 4:** Mass spectrum of compound **1**


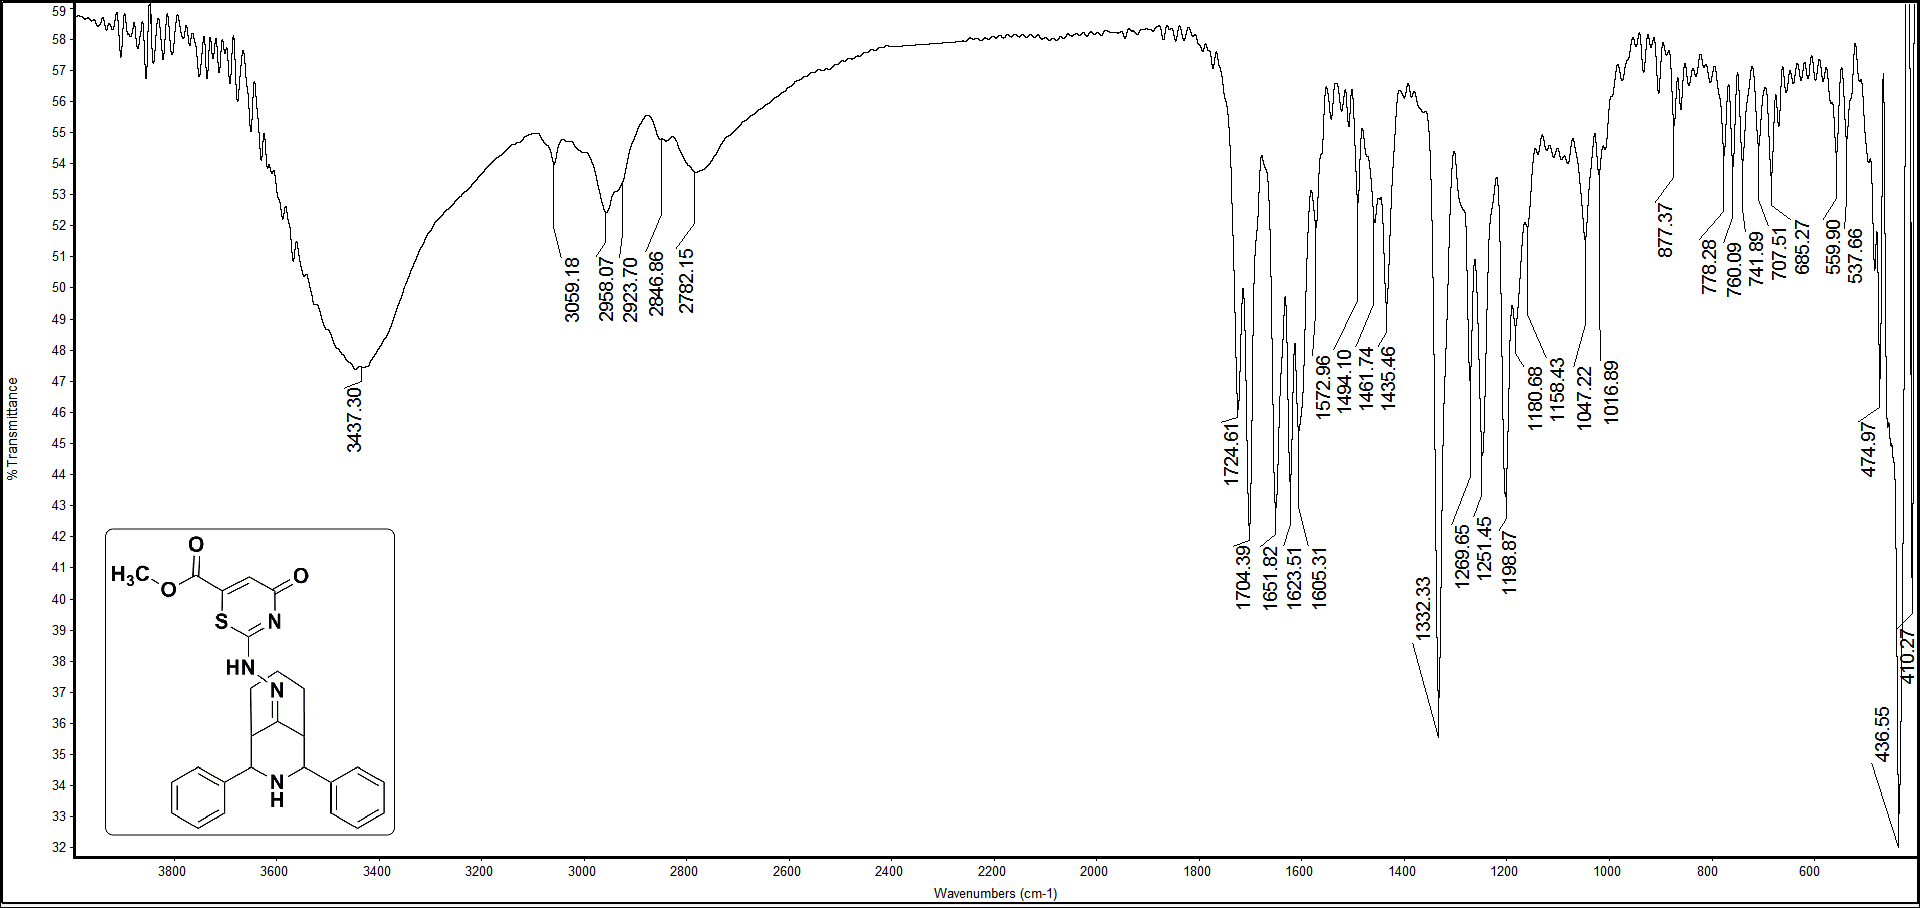


**Figure S 5:** FTIR spectrum of compound **2**


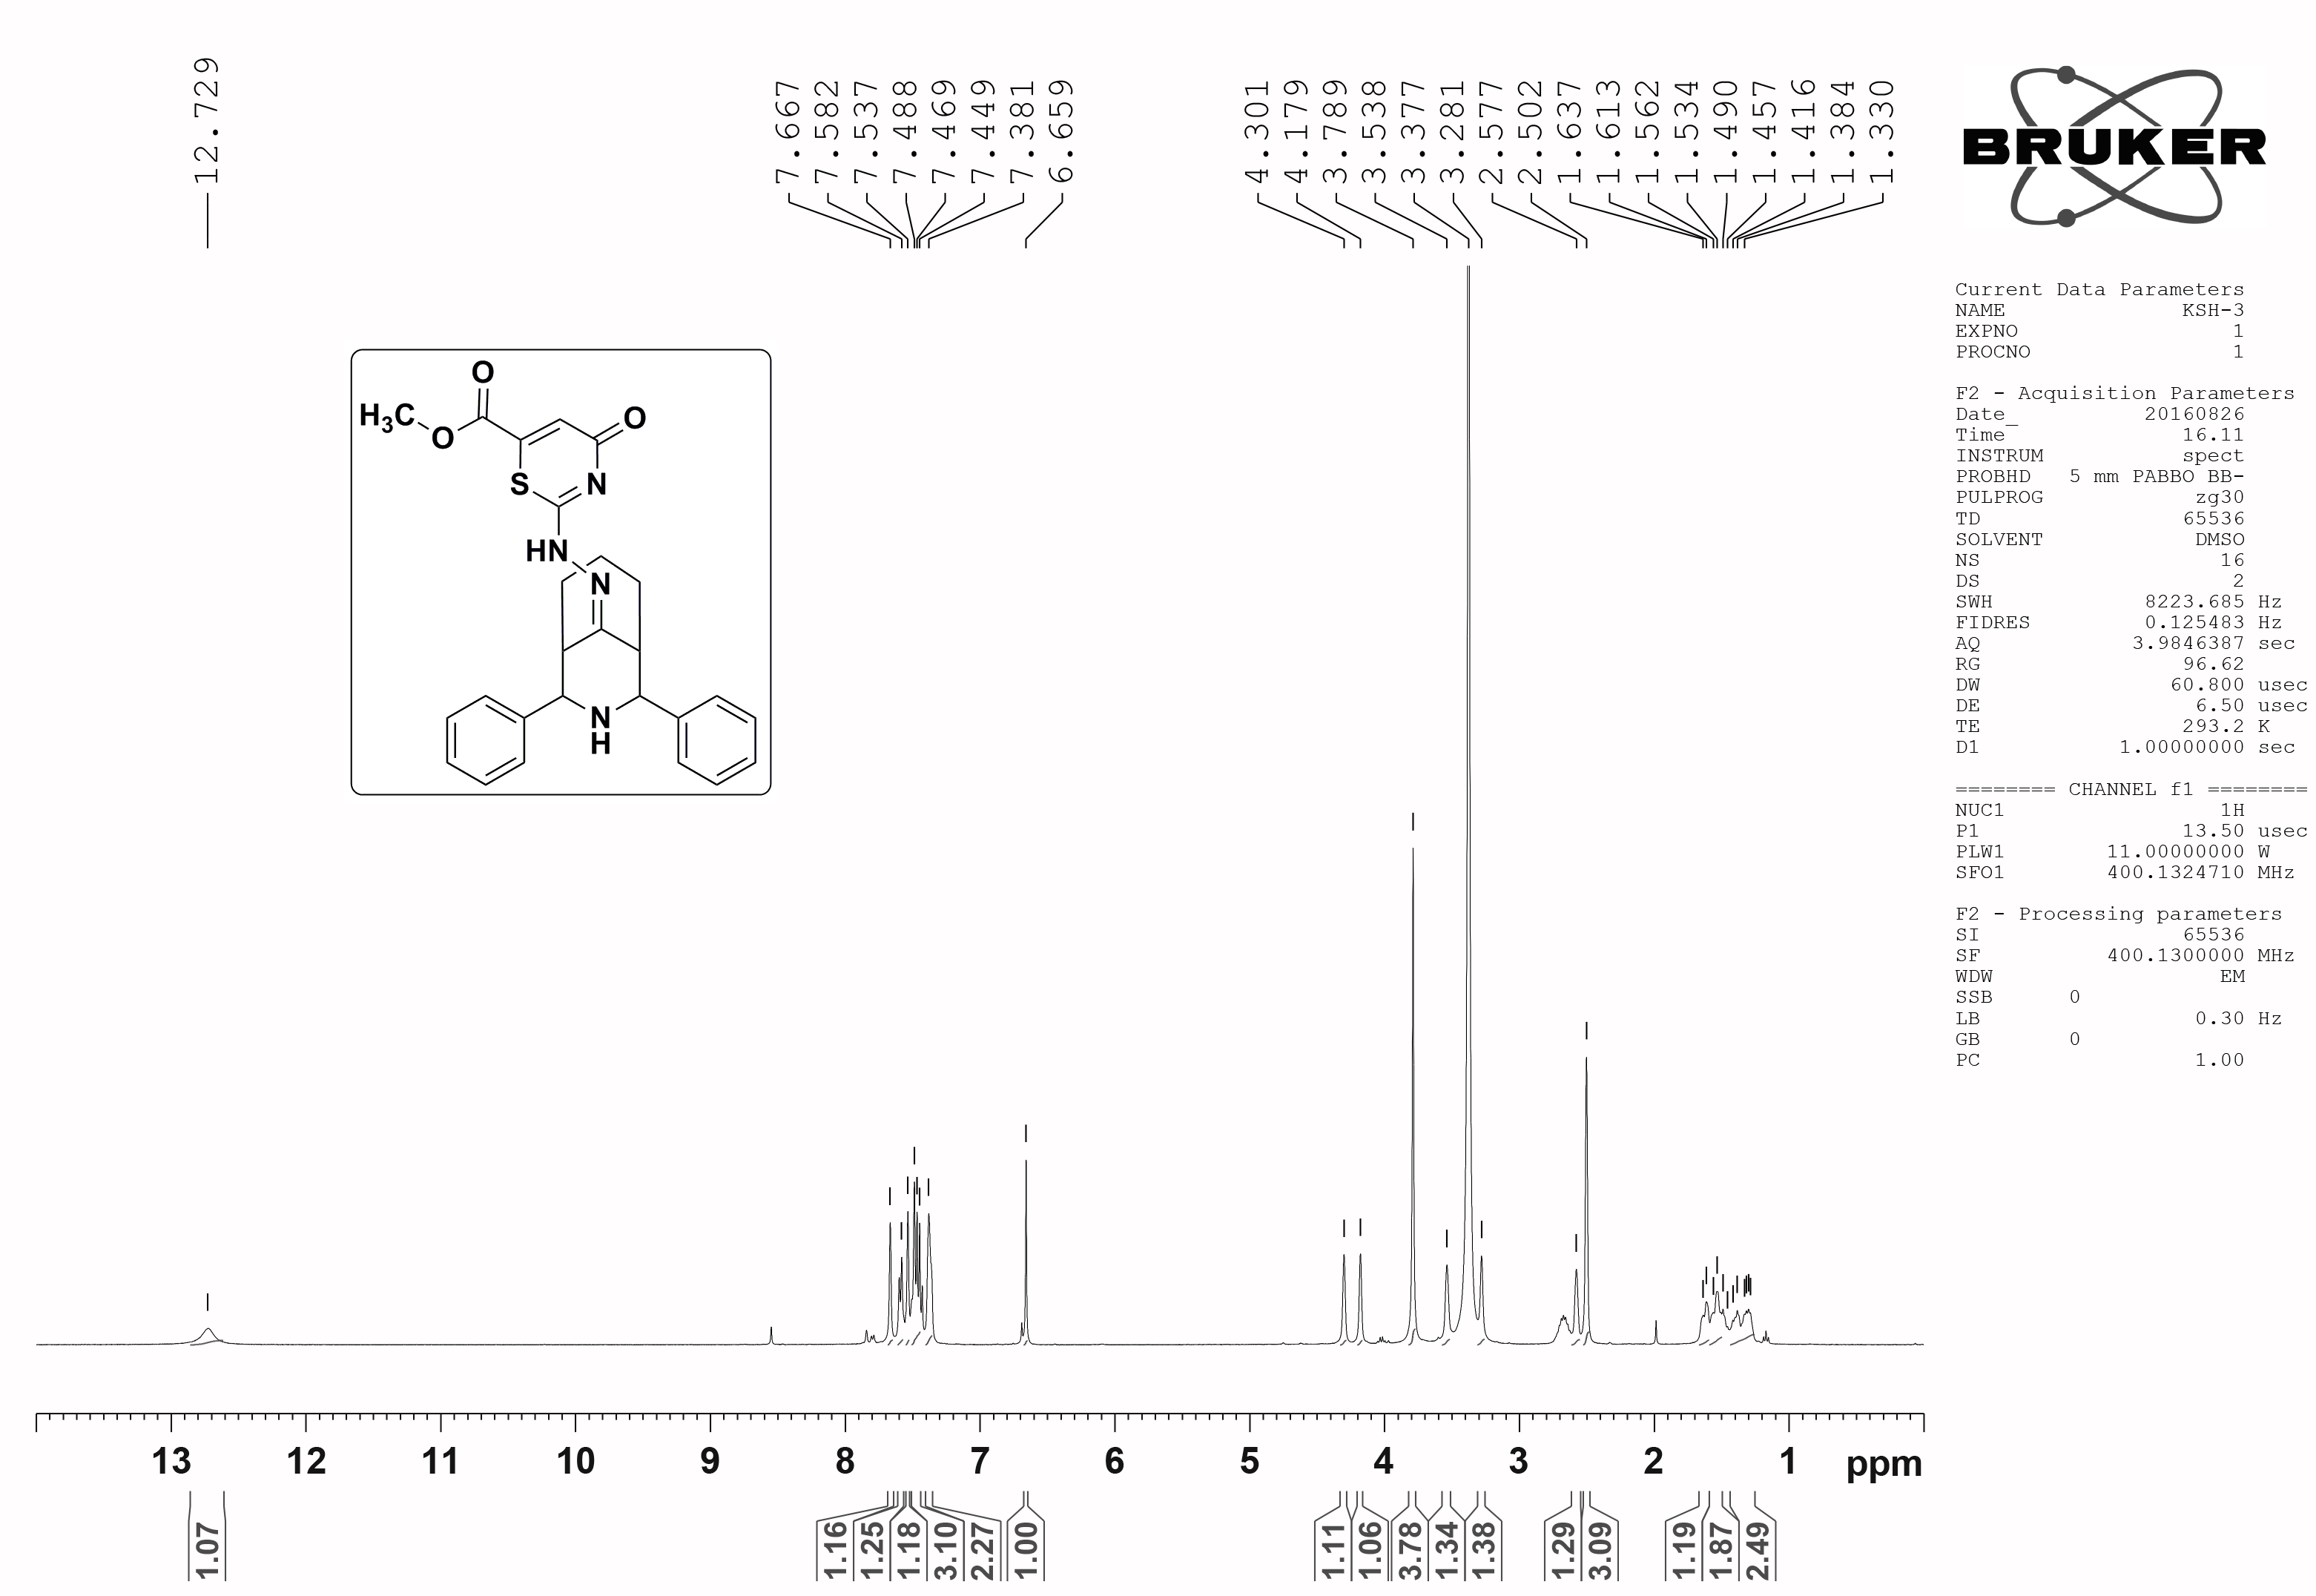


**Figure S 6:** 1H NMR of compound **2**


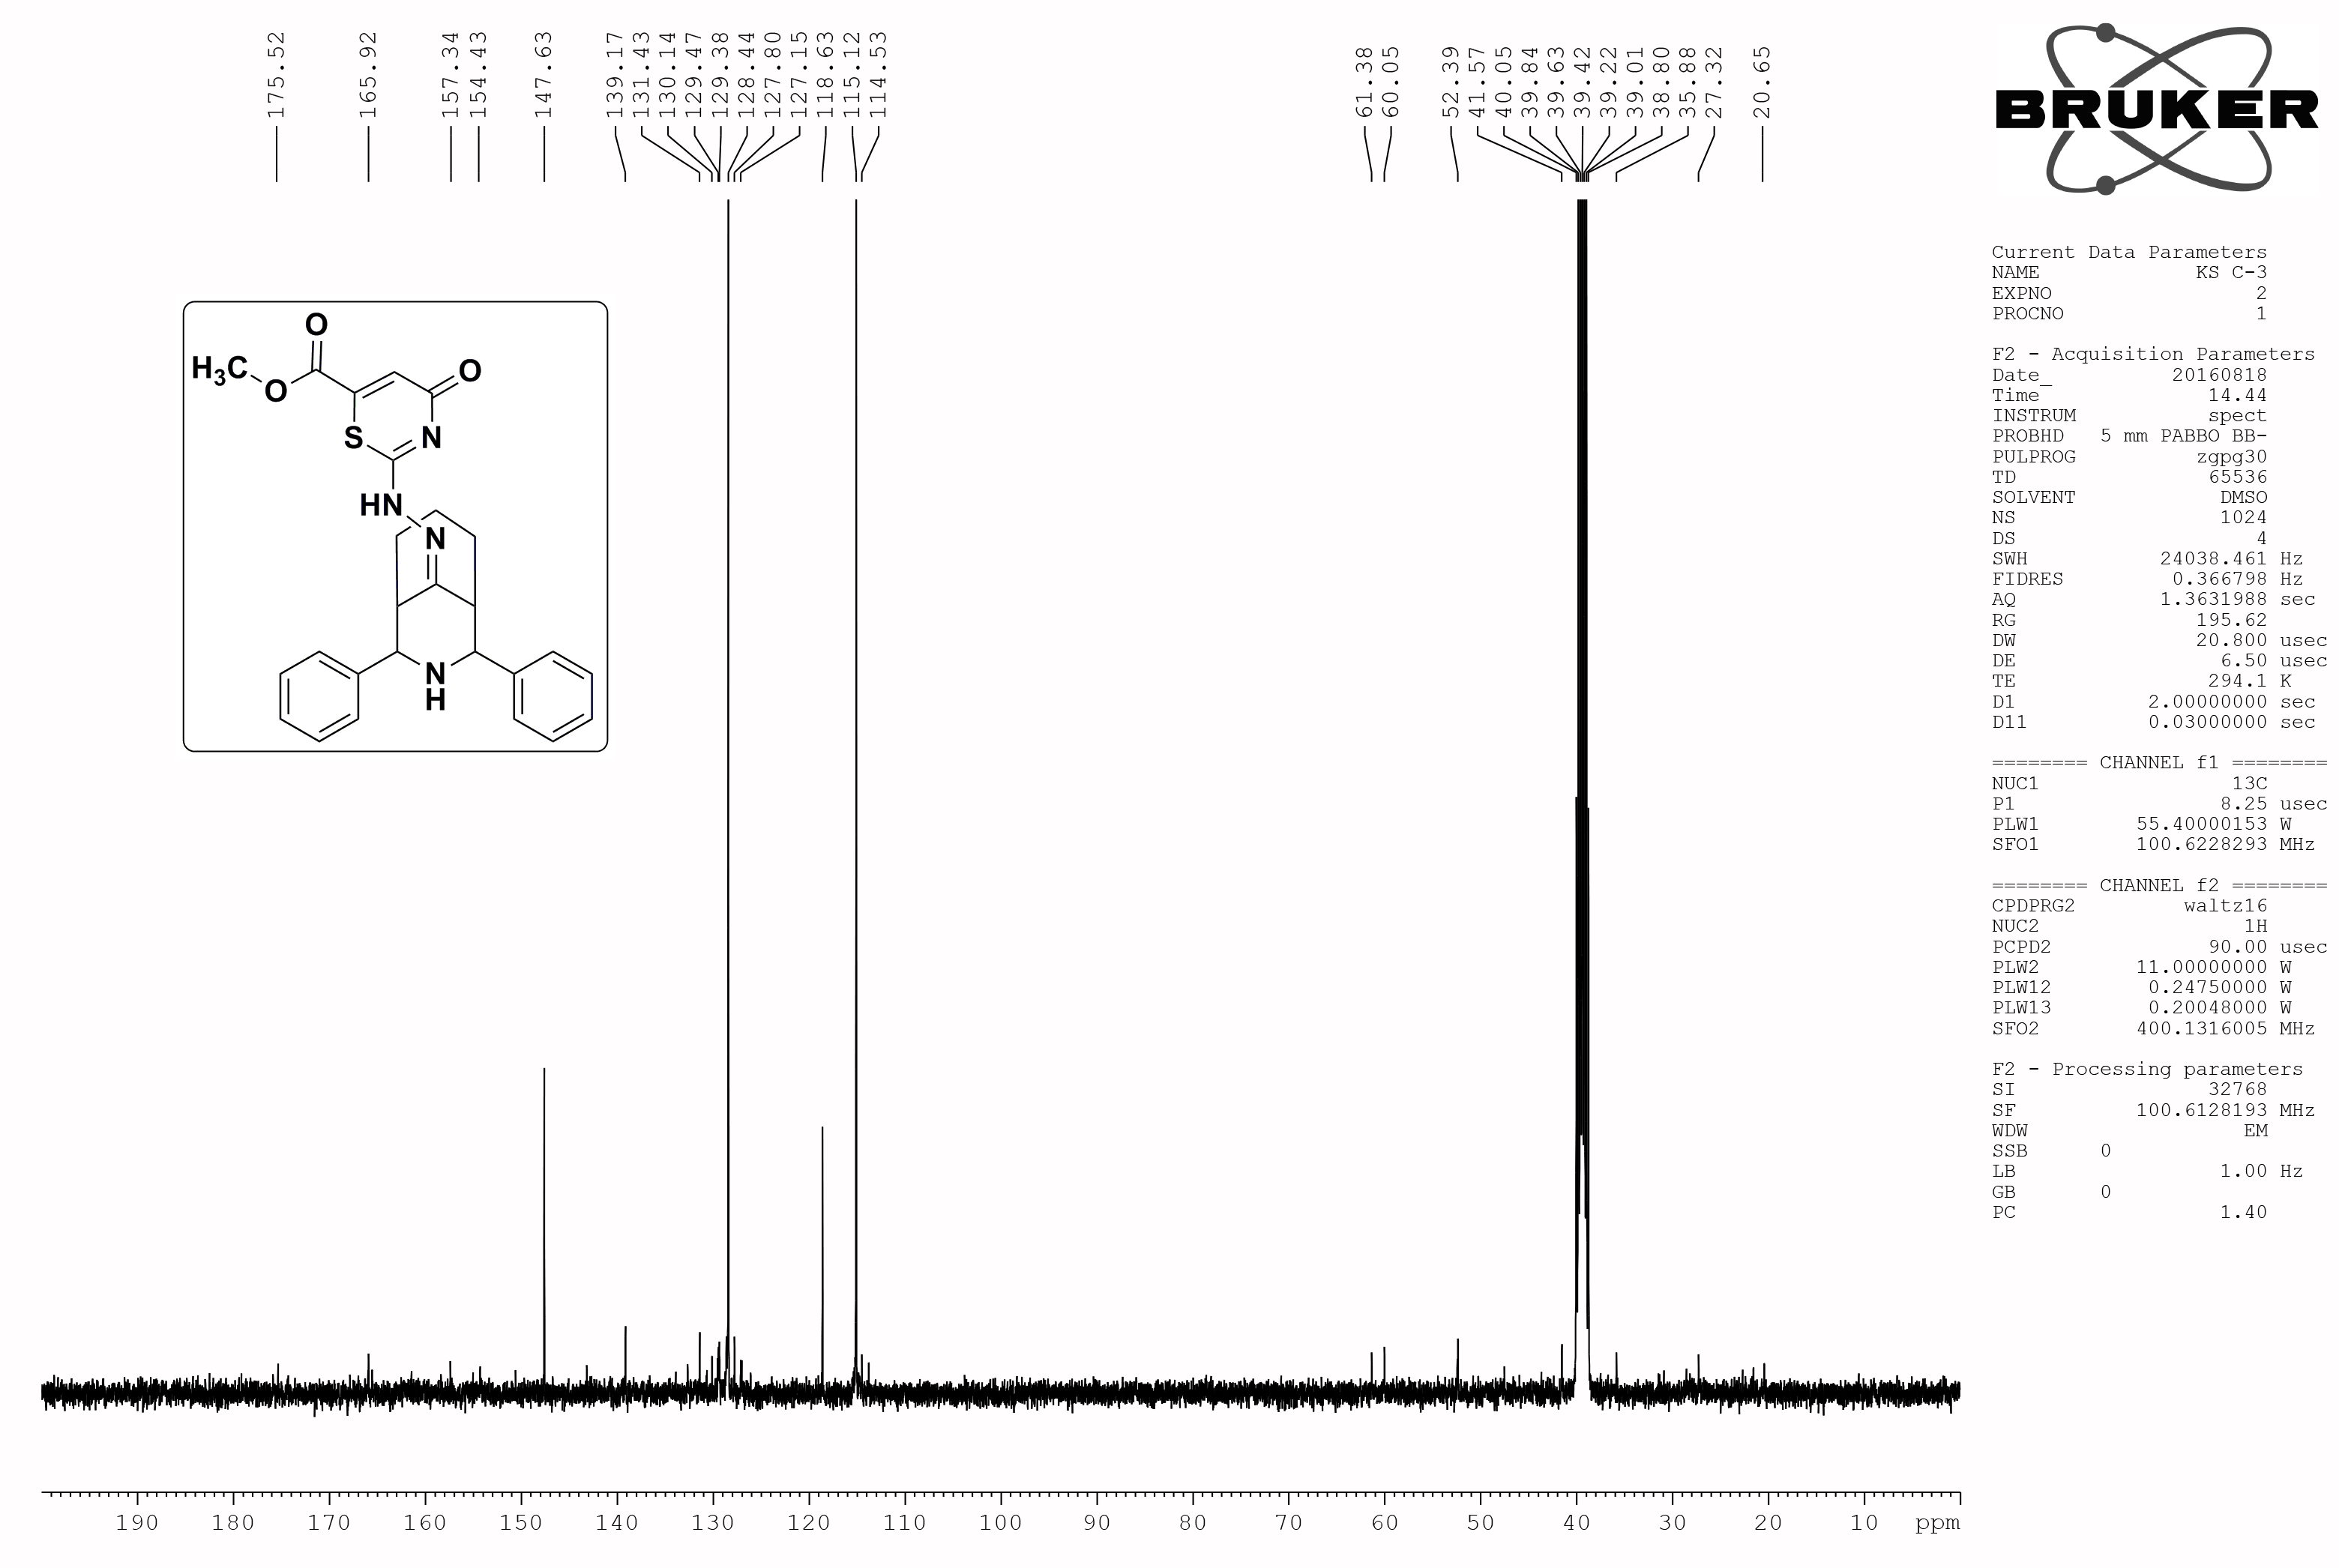


**Figure S 7:** 13C NMR of compound **2**


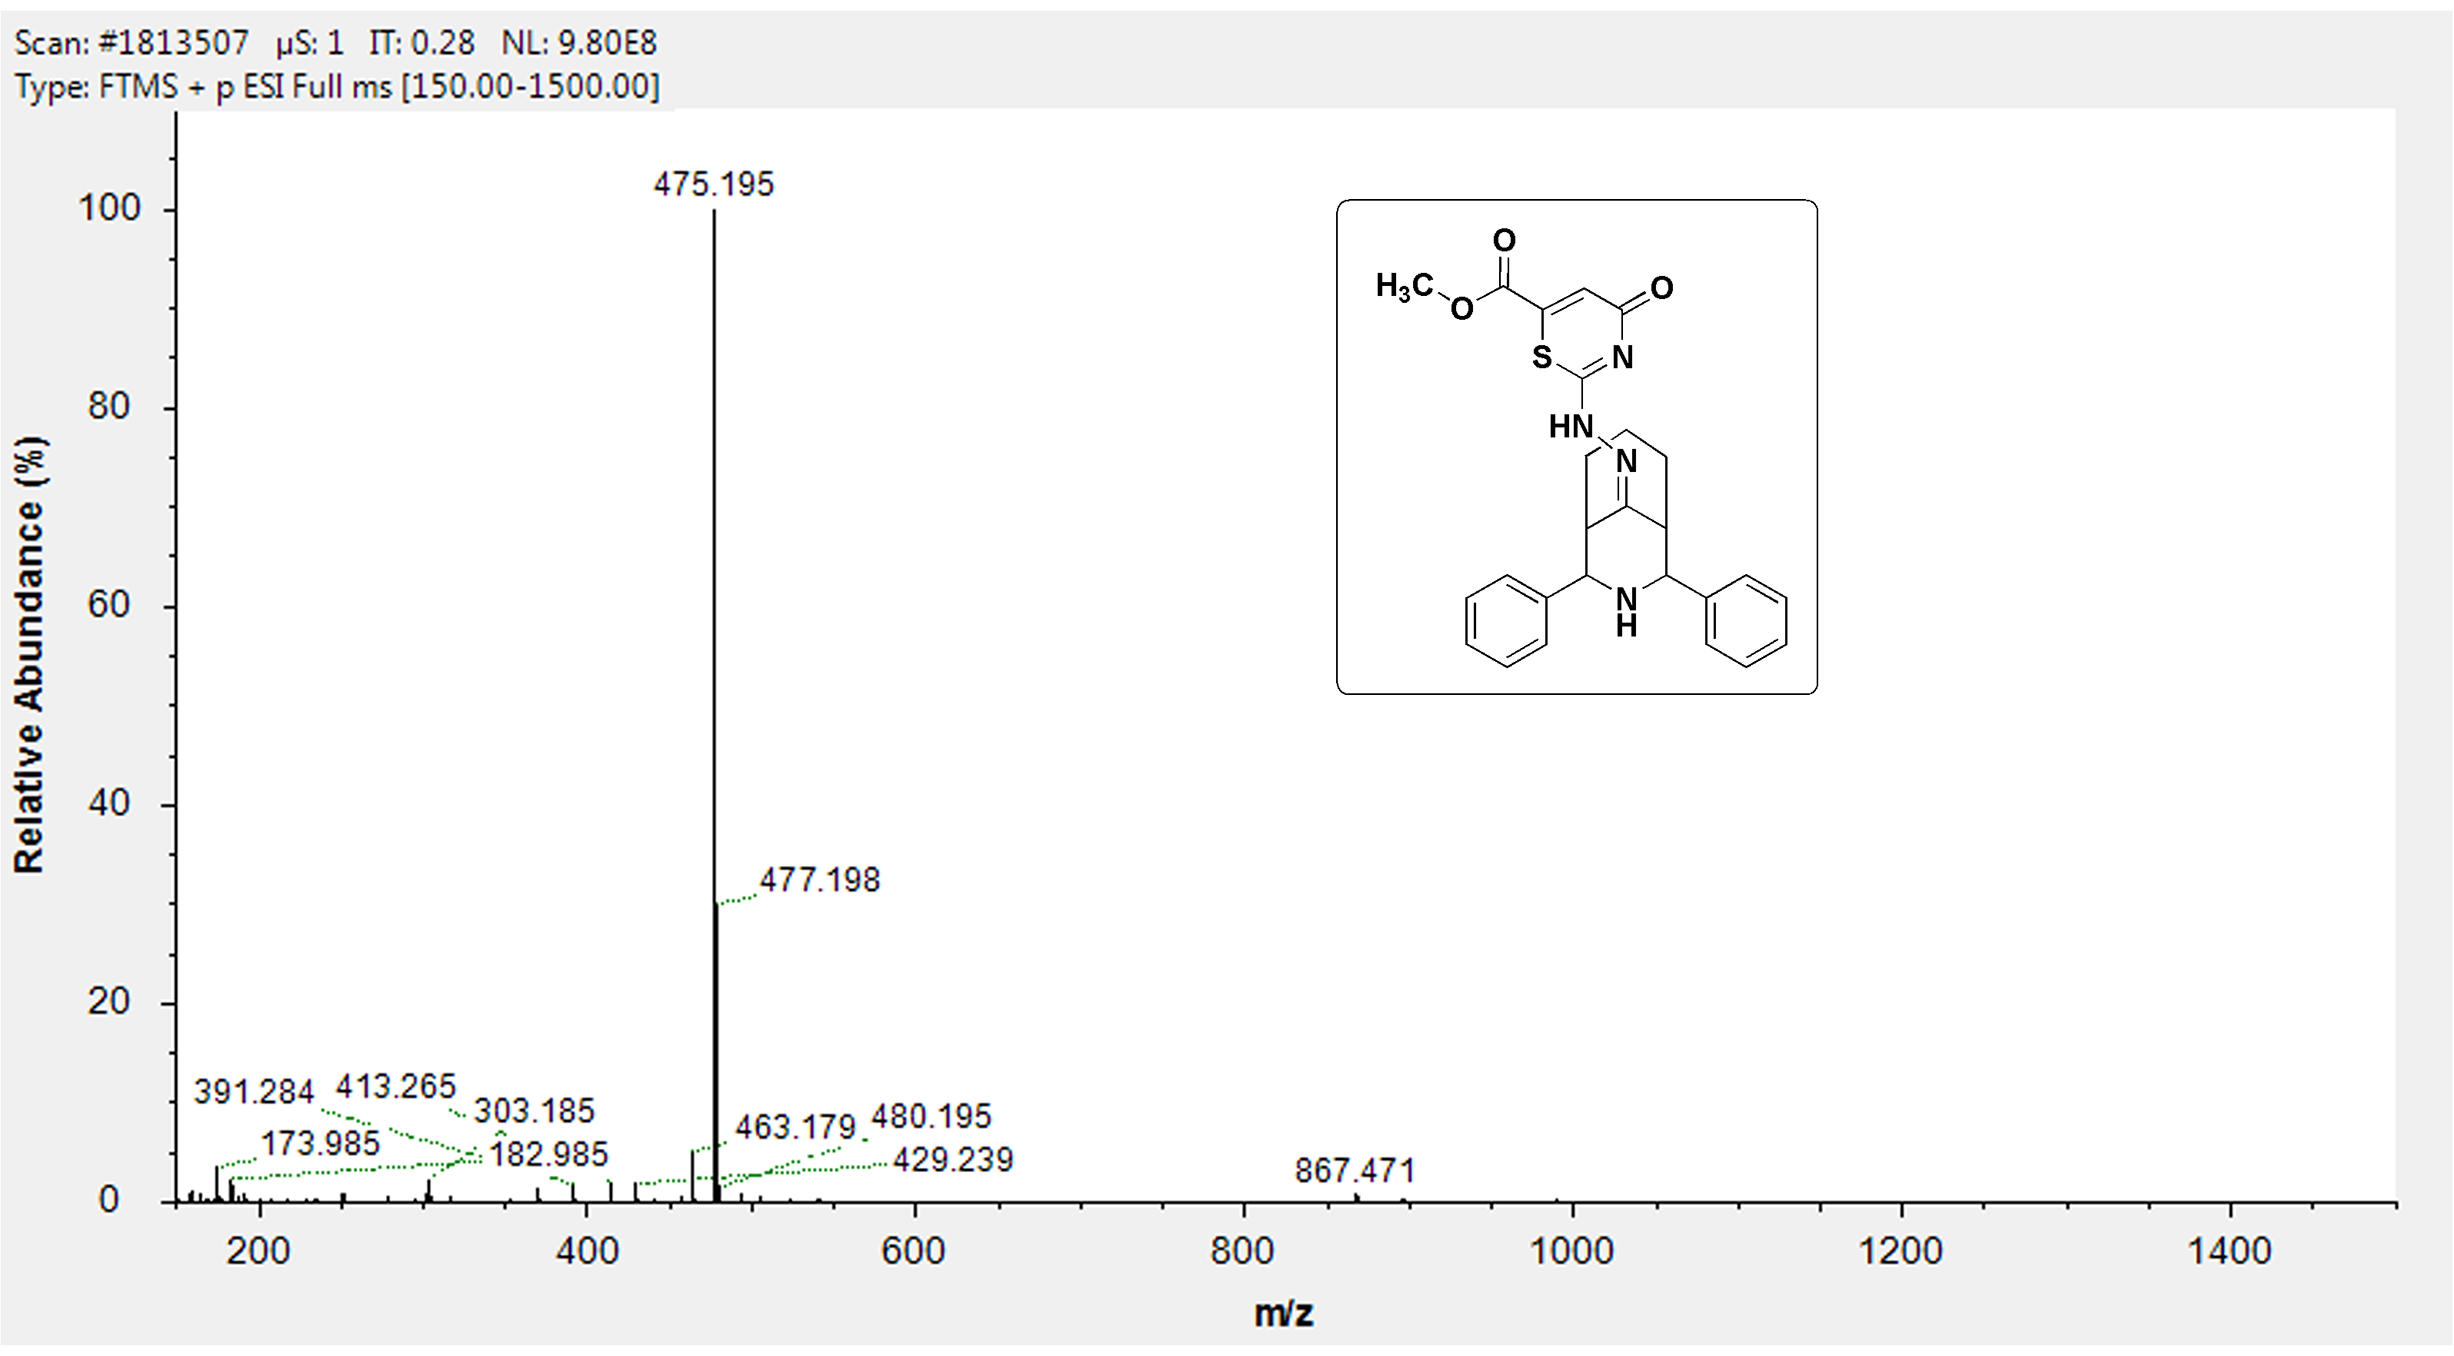


**Figure S 8:** Mass spectrum of compound **2**


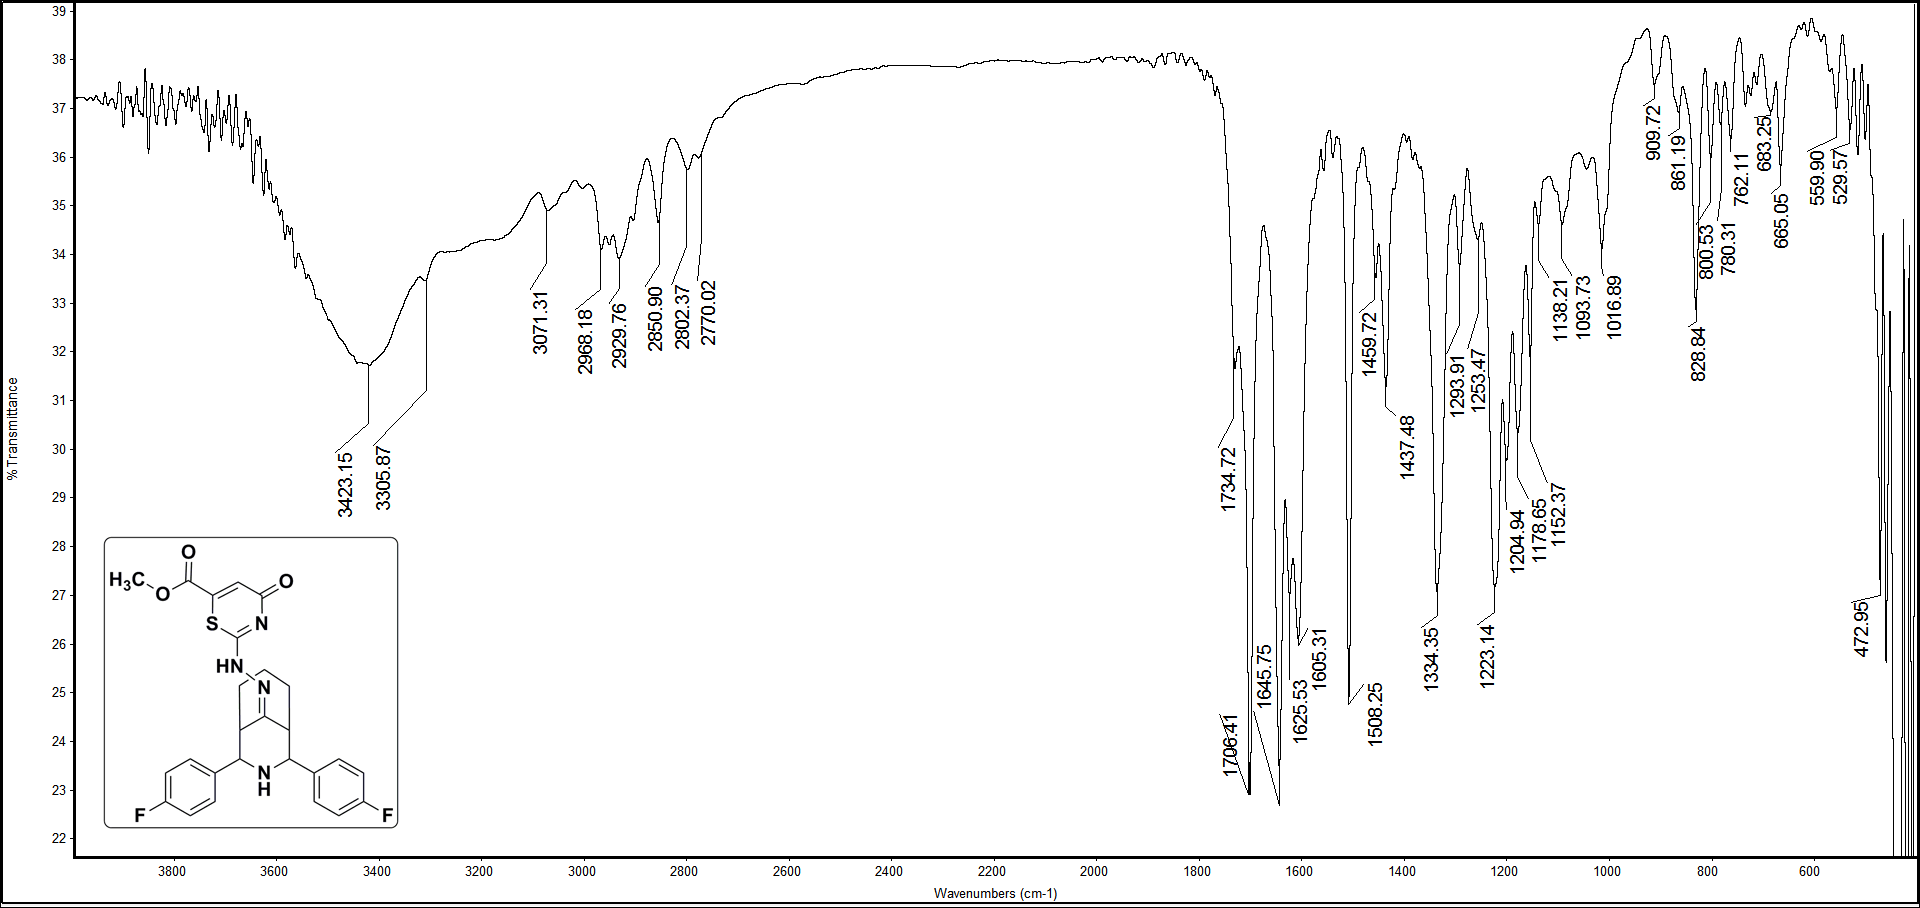


**Figure S 9:** FTIR spectrum of compound **3**


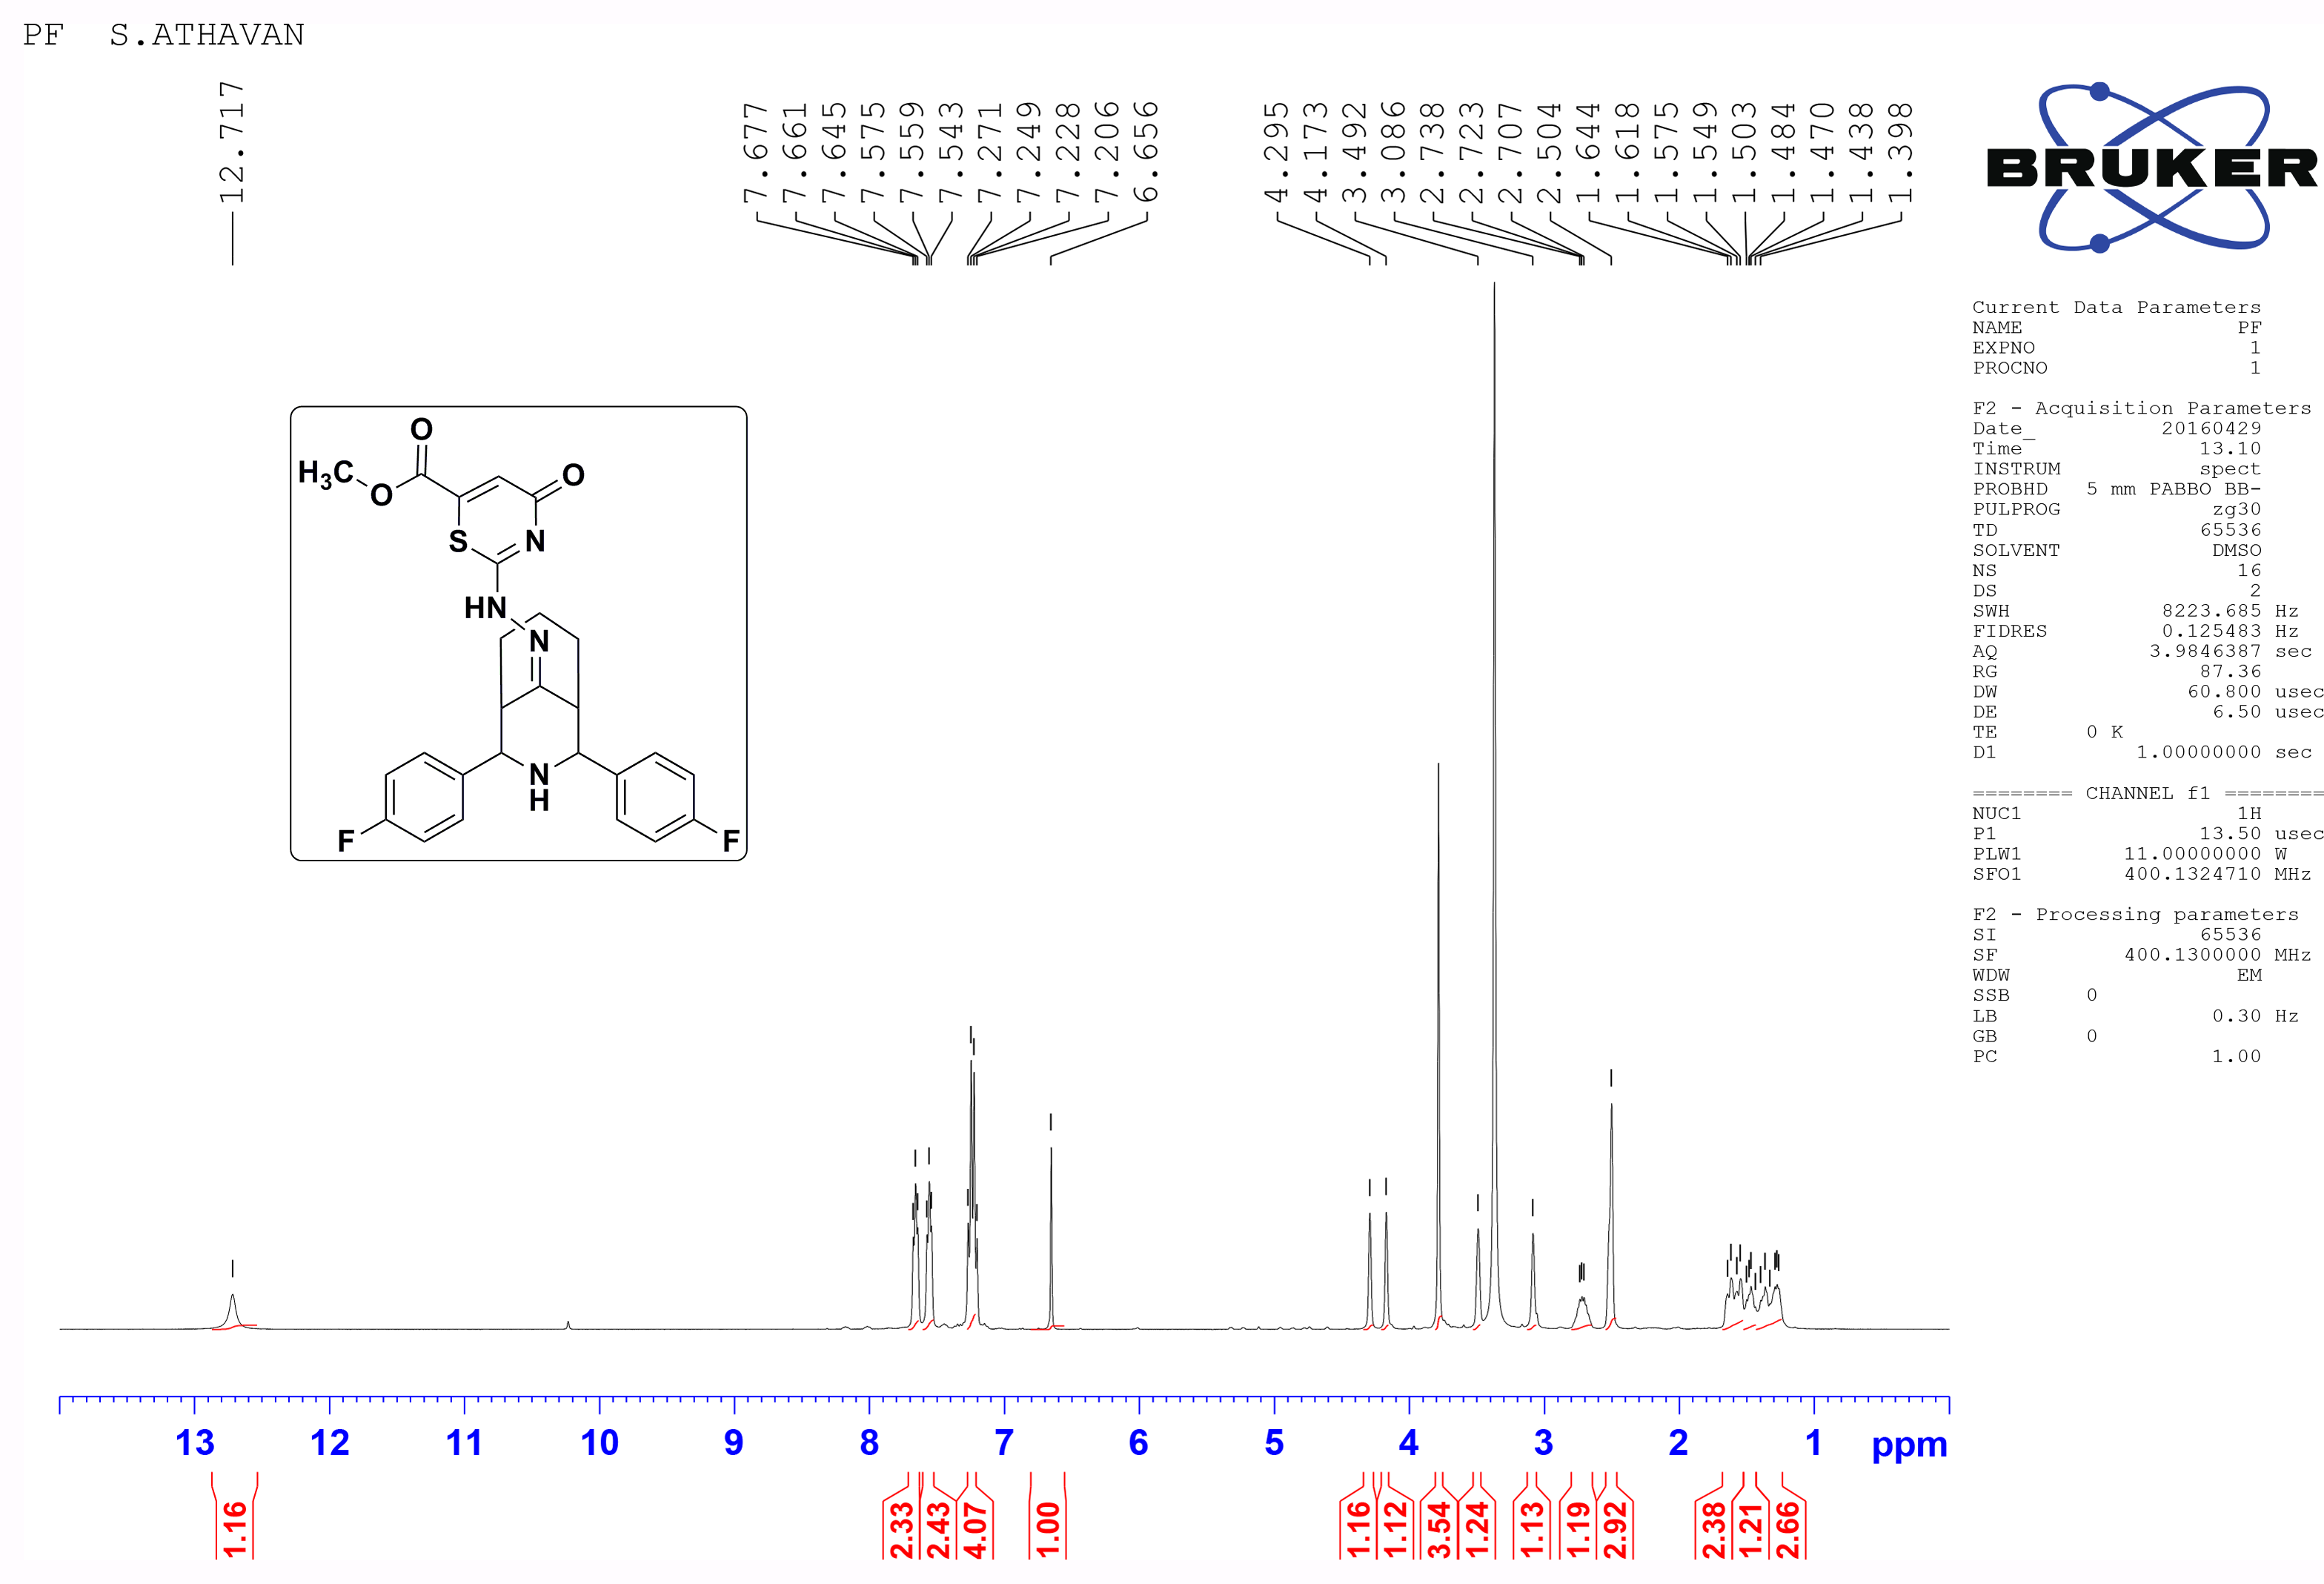


**Figure S 10:** 1H NMR of compound **3**


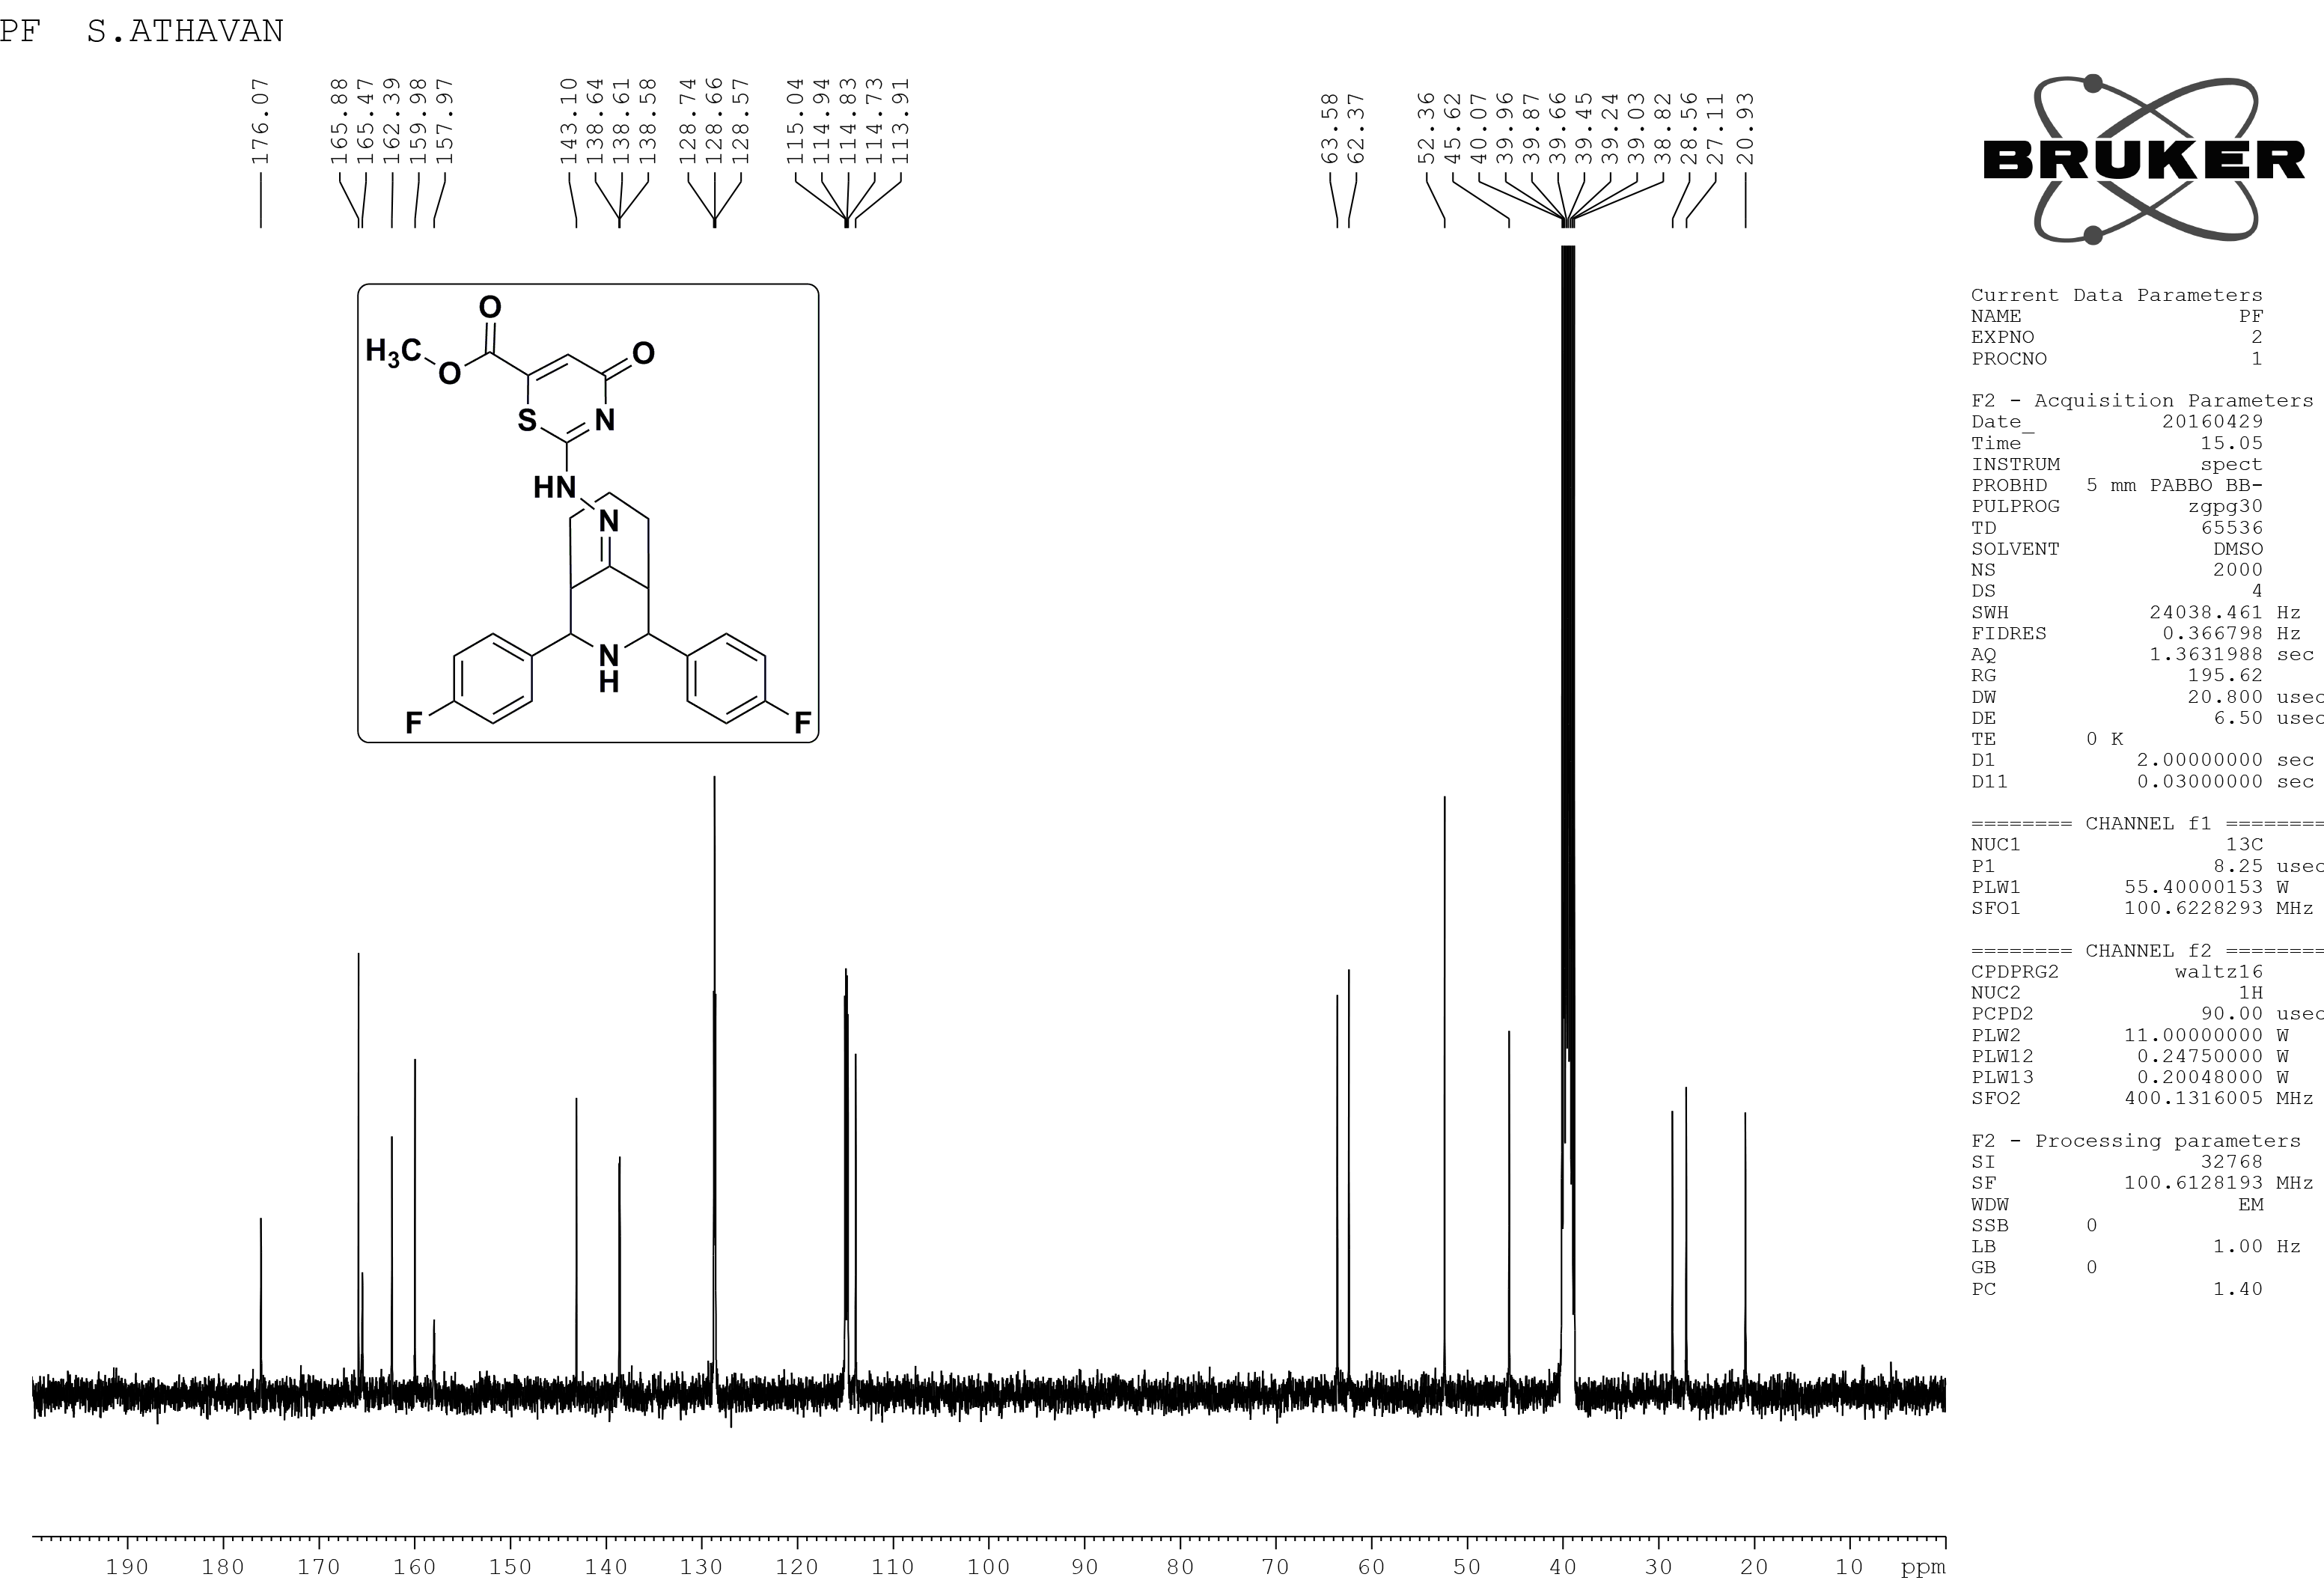


**Figure S 11:** 13C NMR of compound **3**


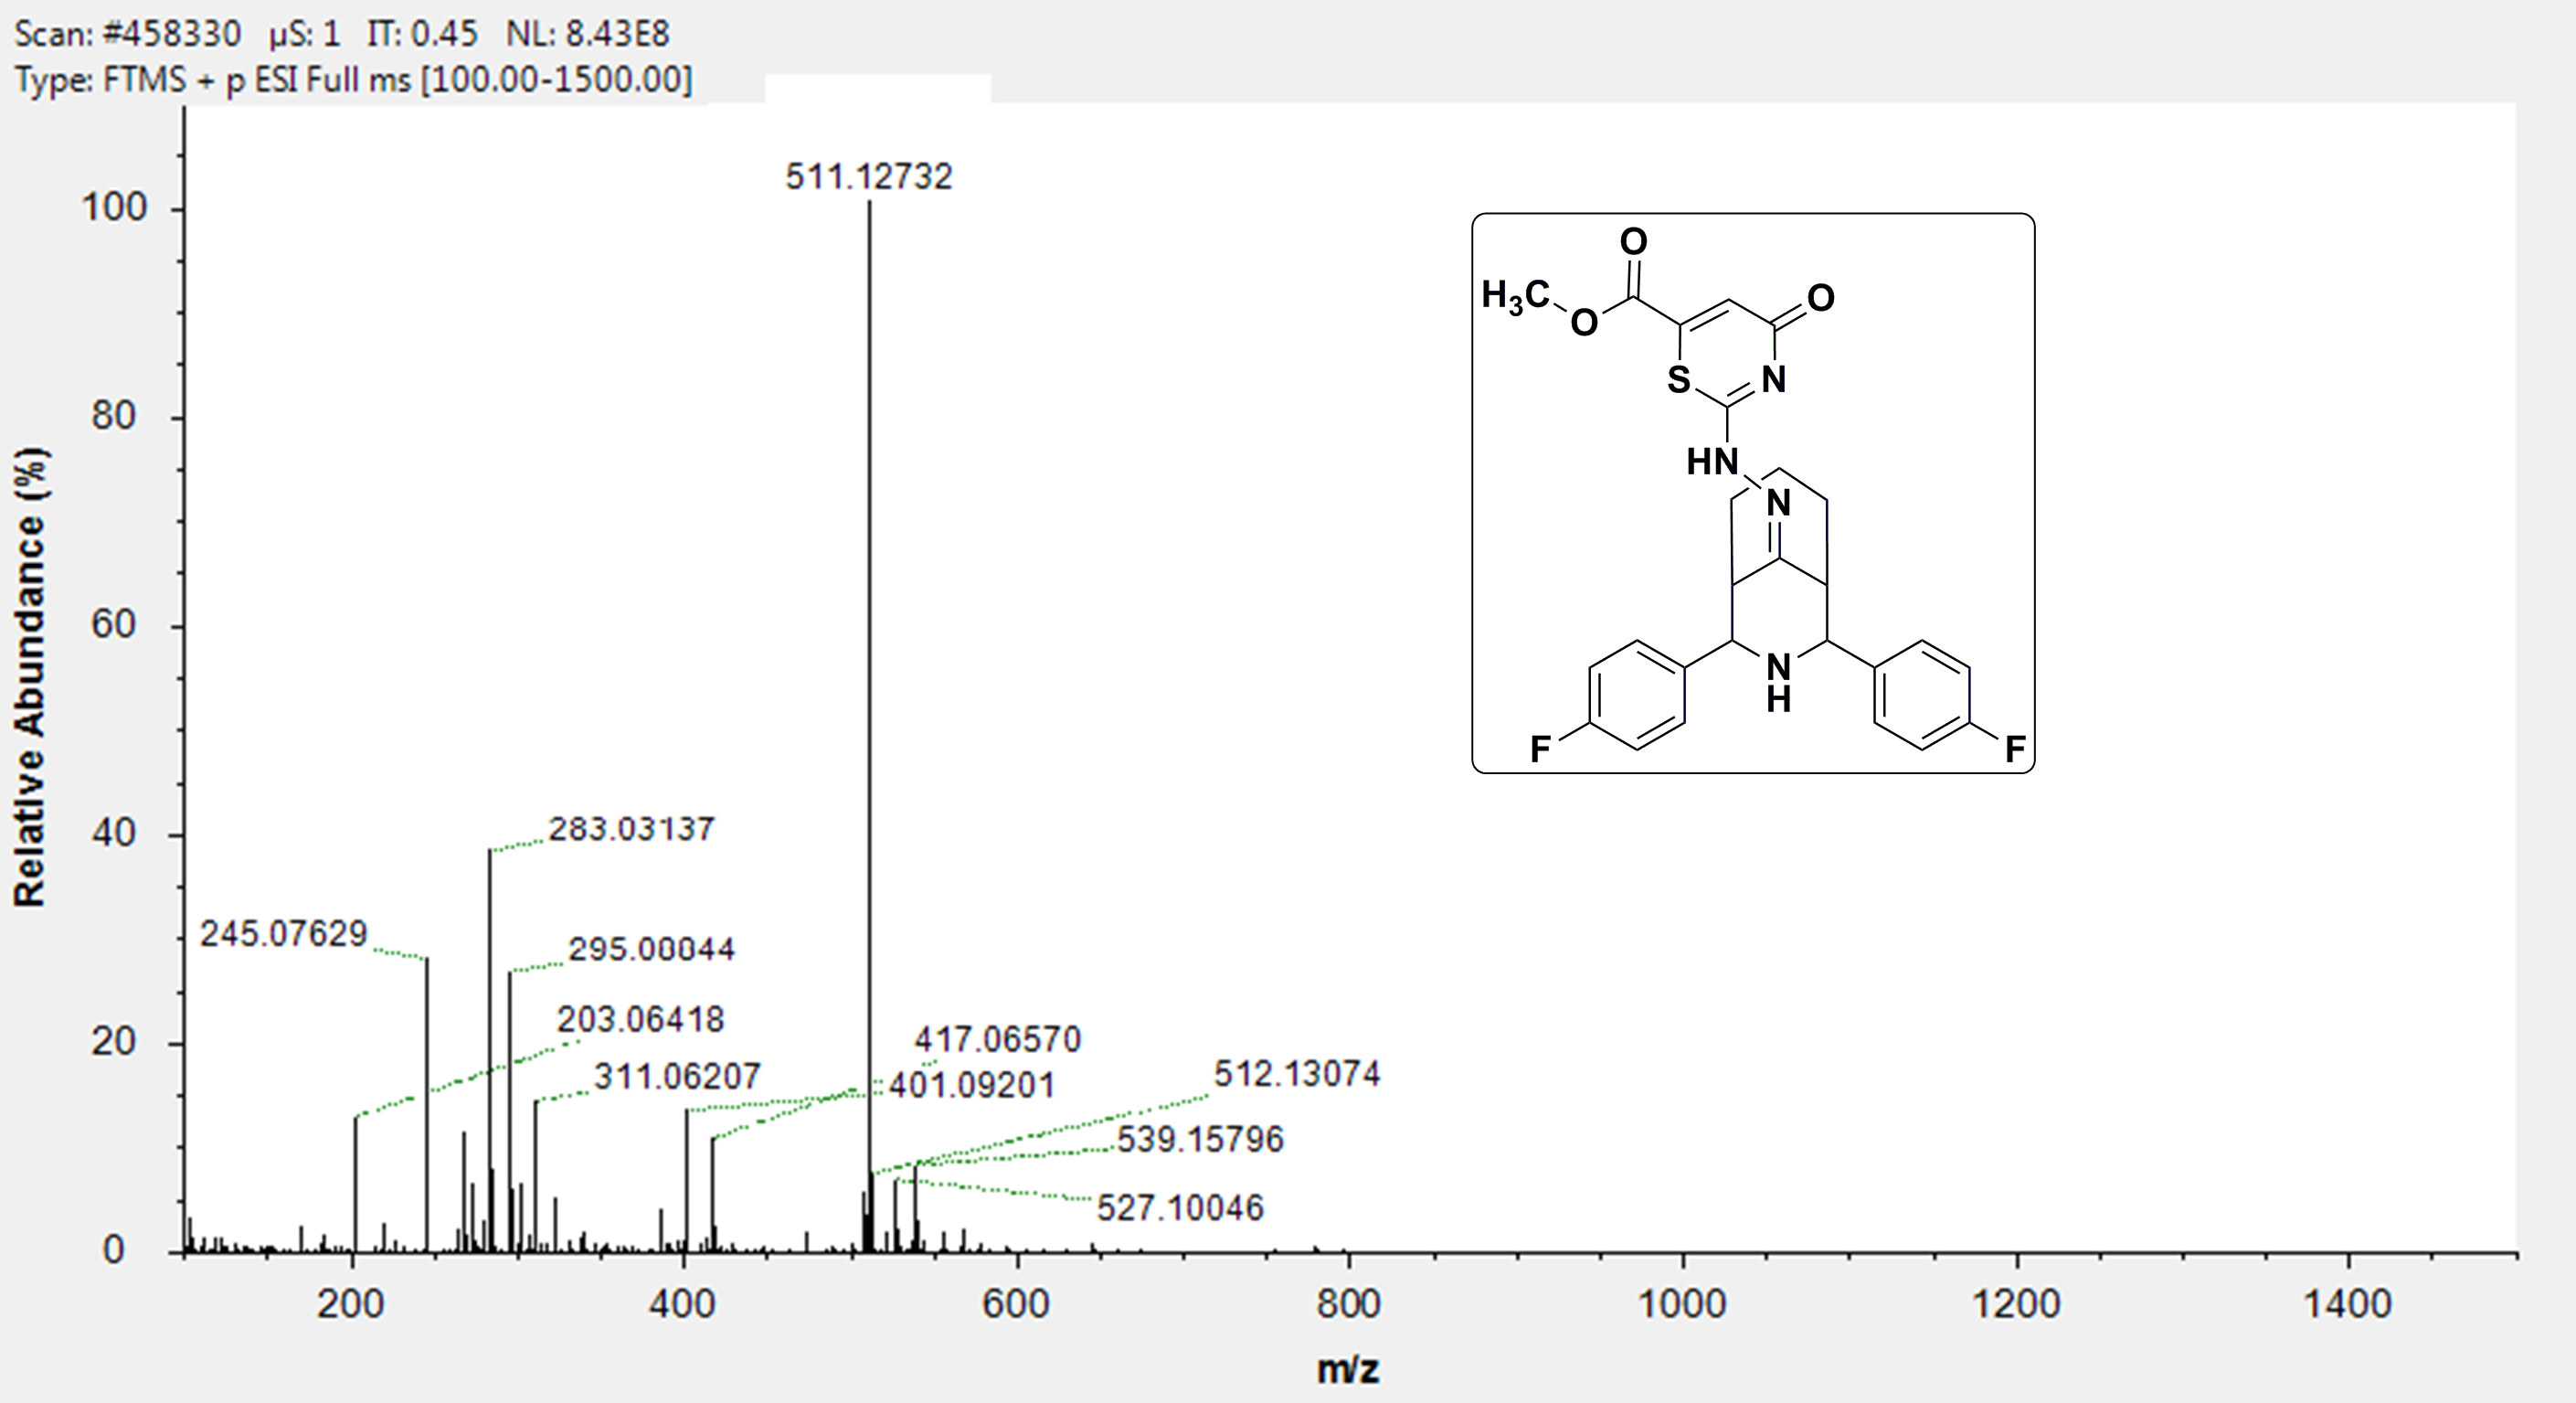


**Figure S 12:** Mass spectrum of compound **3**


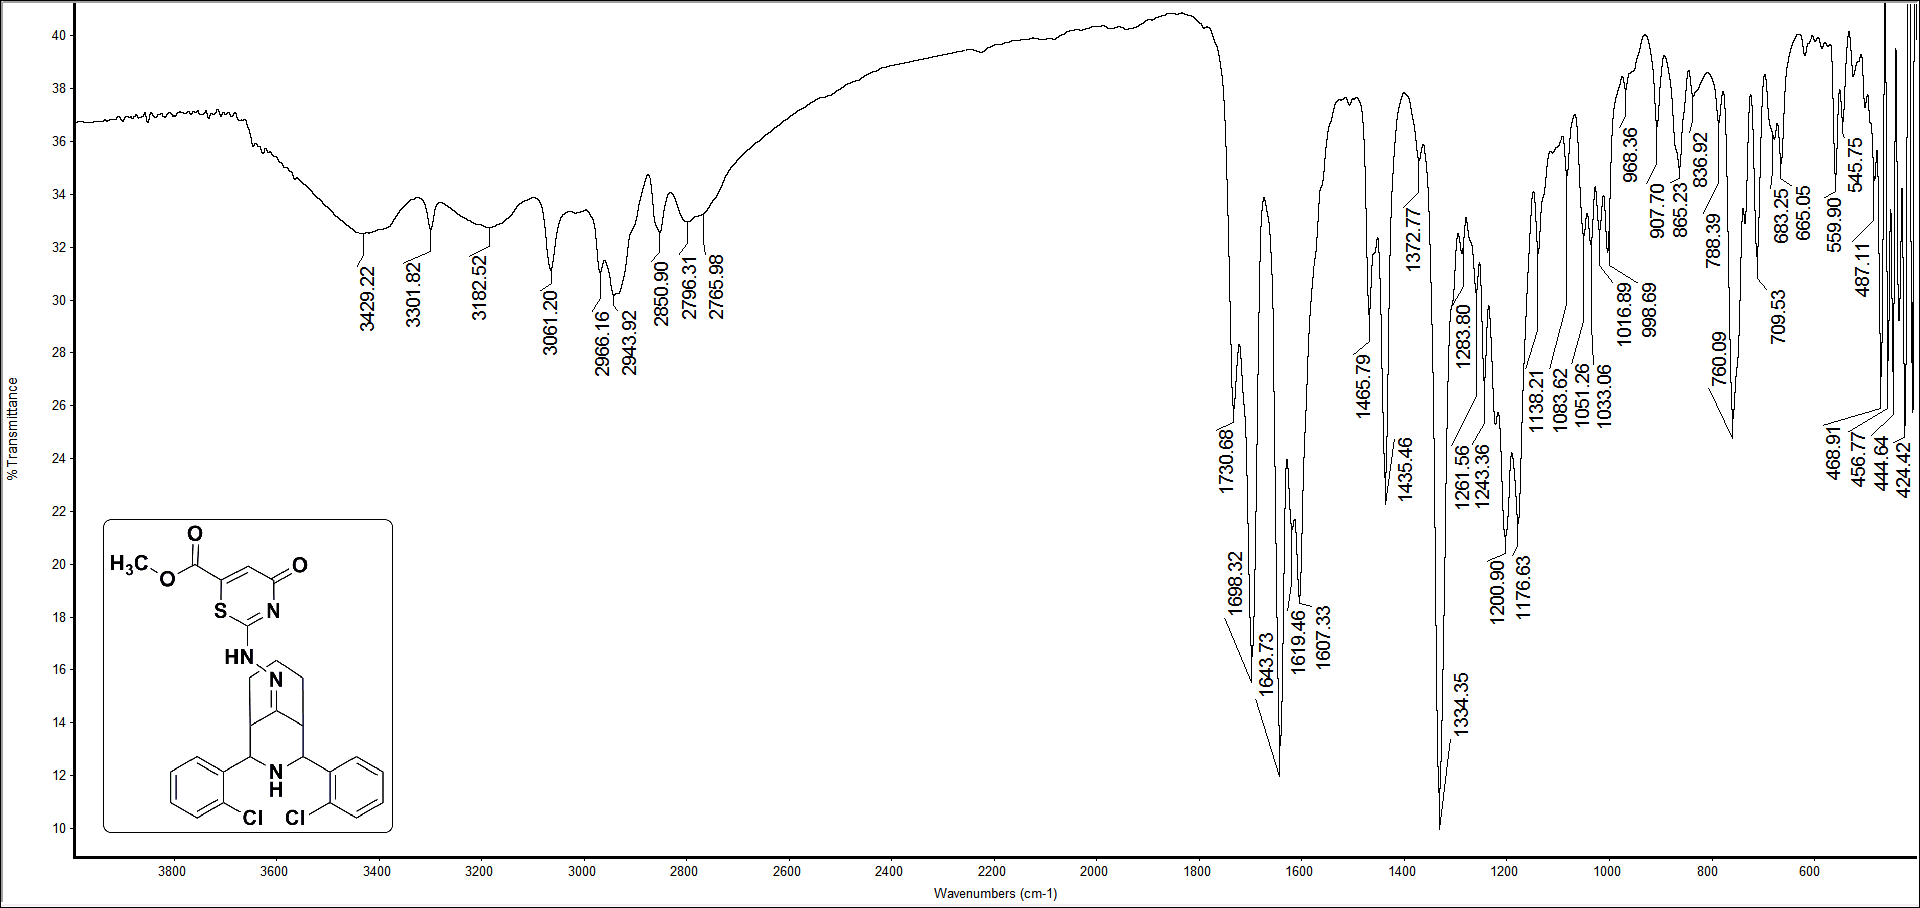


**Figure S 13:** FTIR spectrum of compound **4**


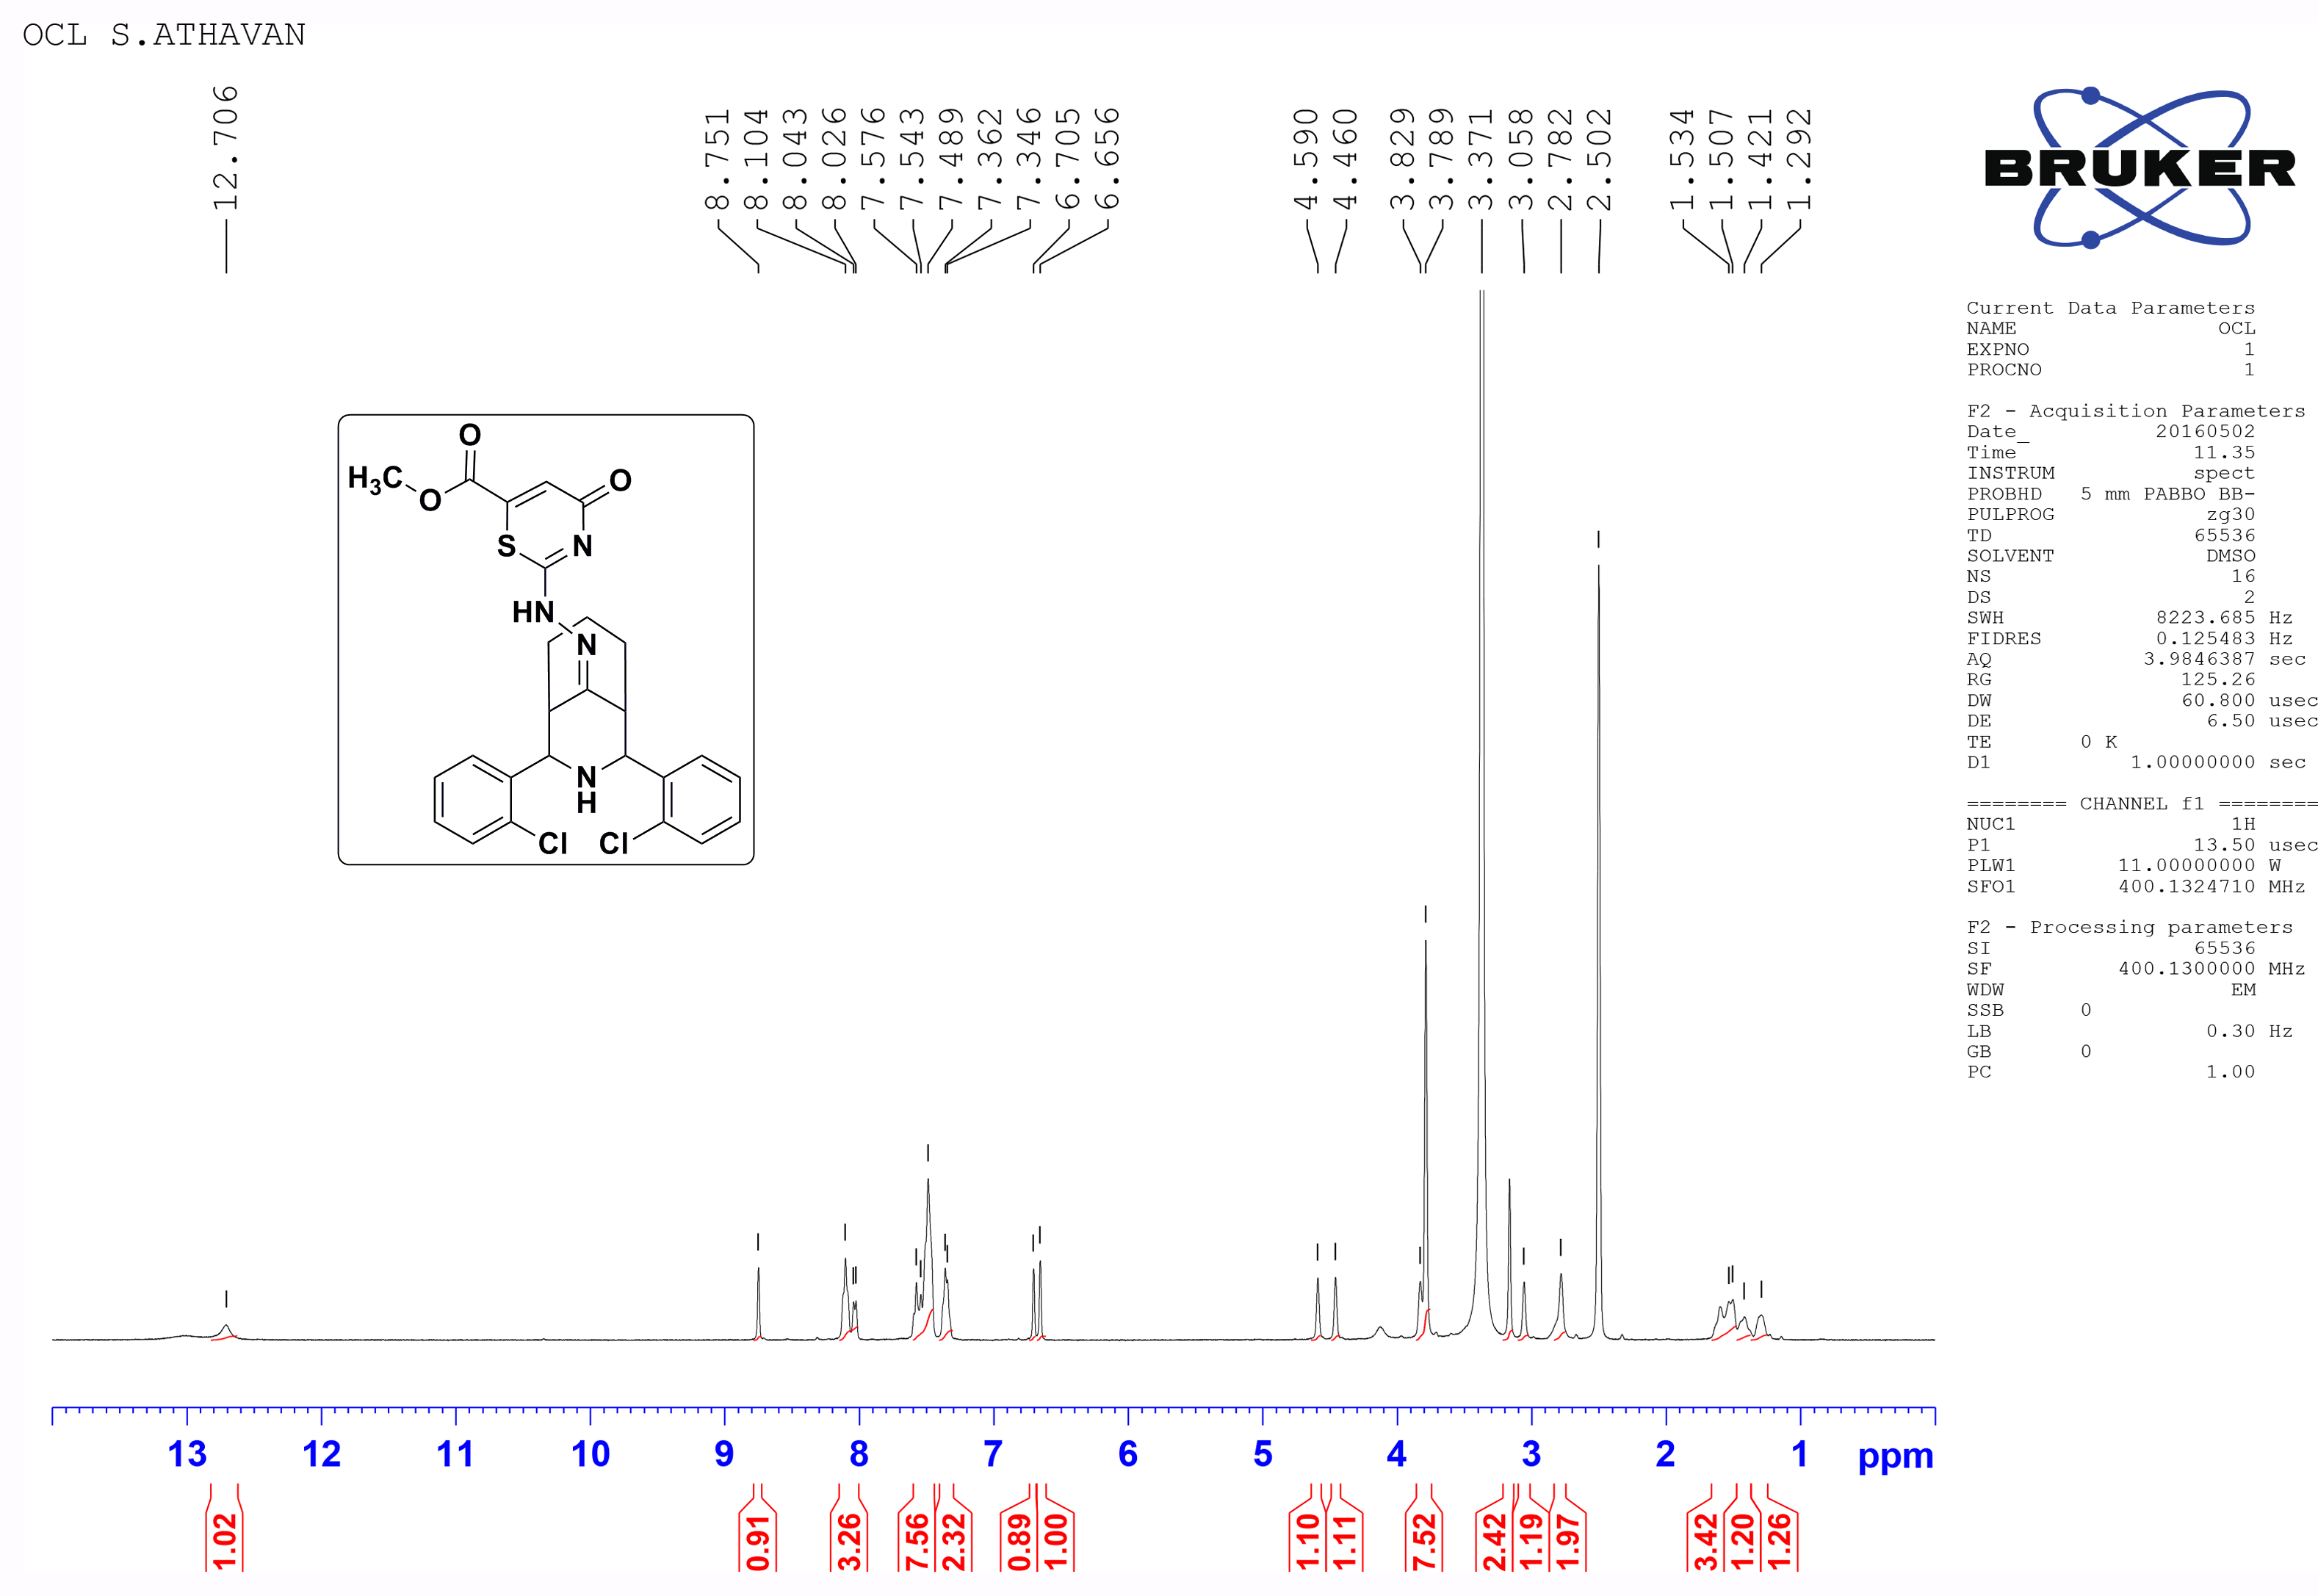


**Figure S 14:** 1H NMR of compound **4**


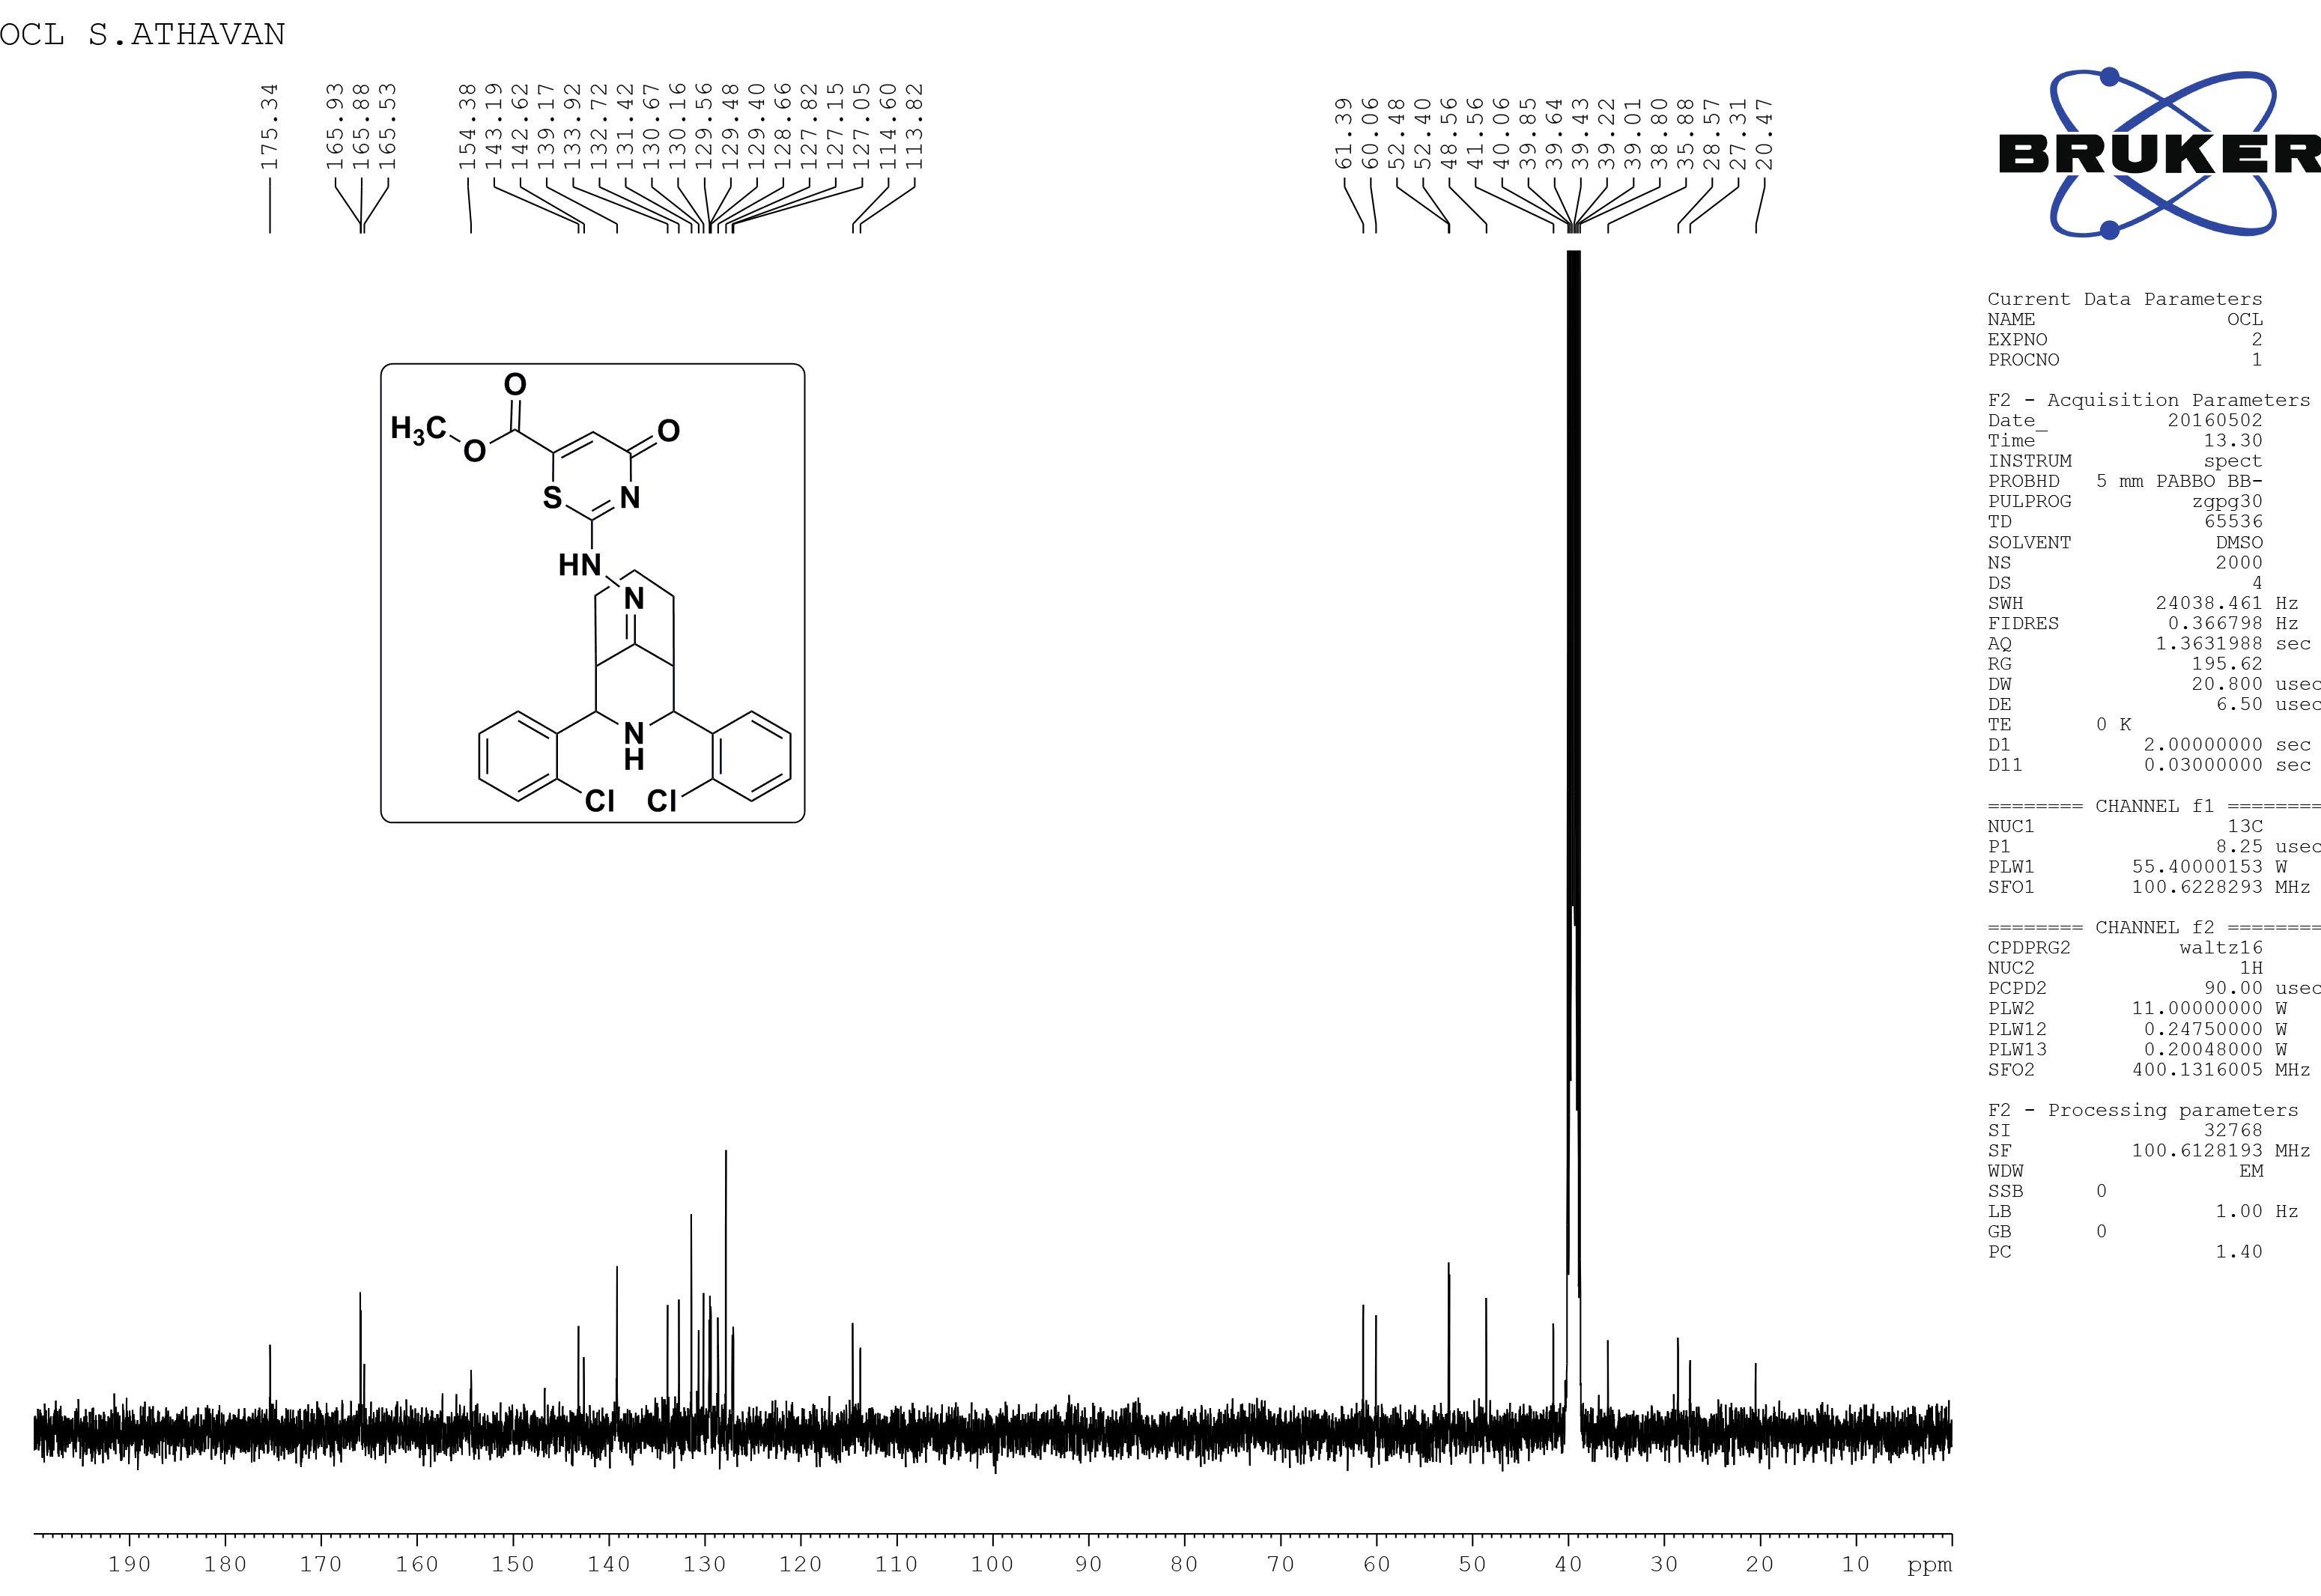


**Figure S 15:** 13C NMR of compound **4**


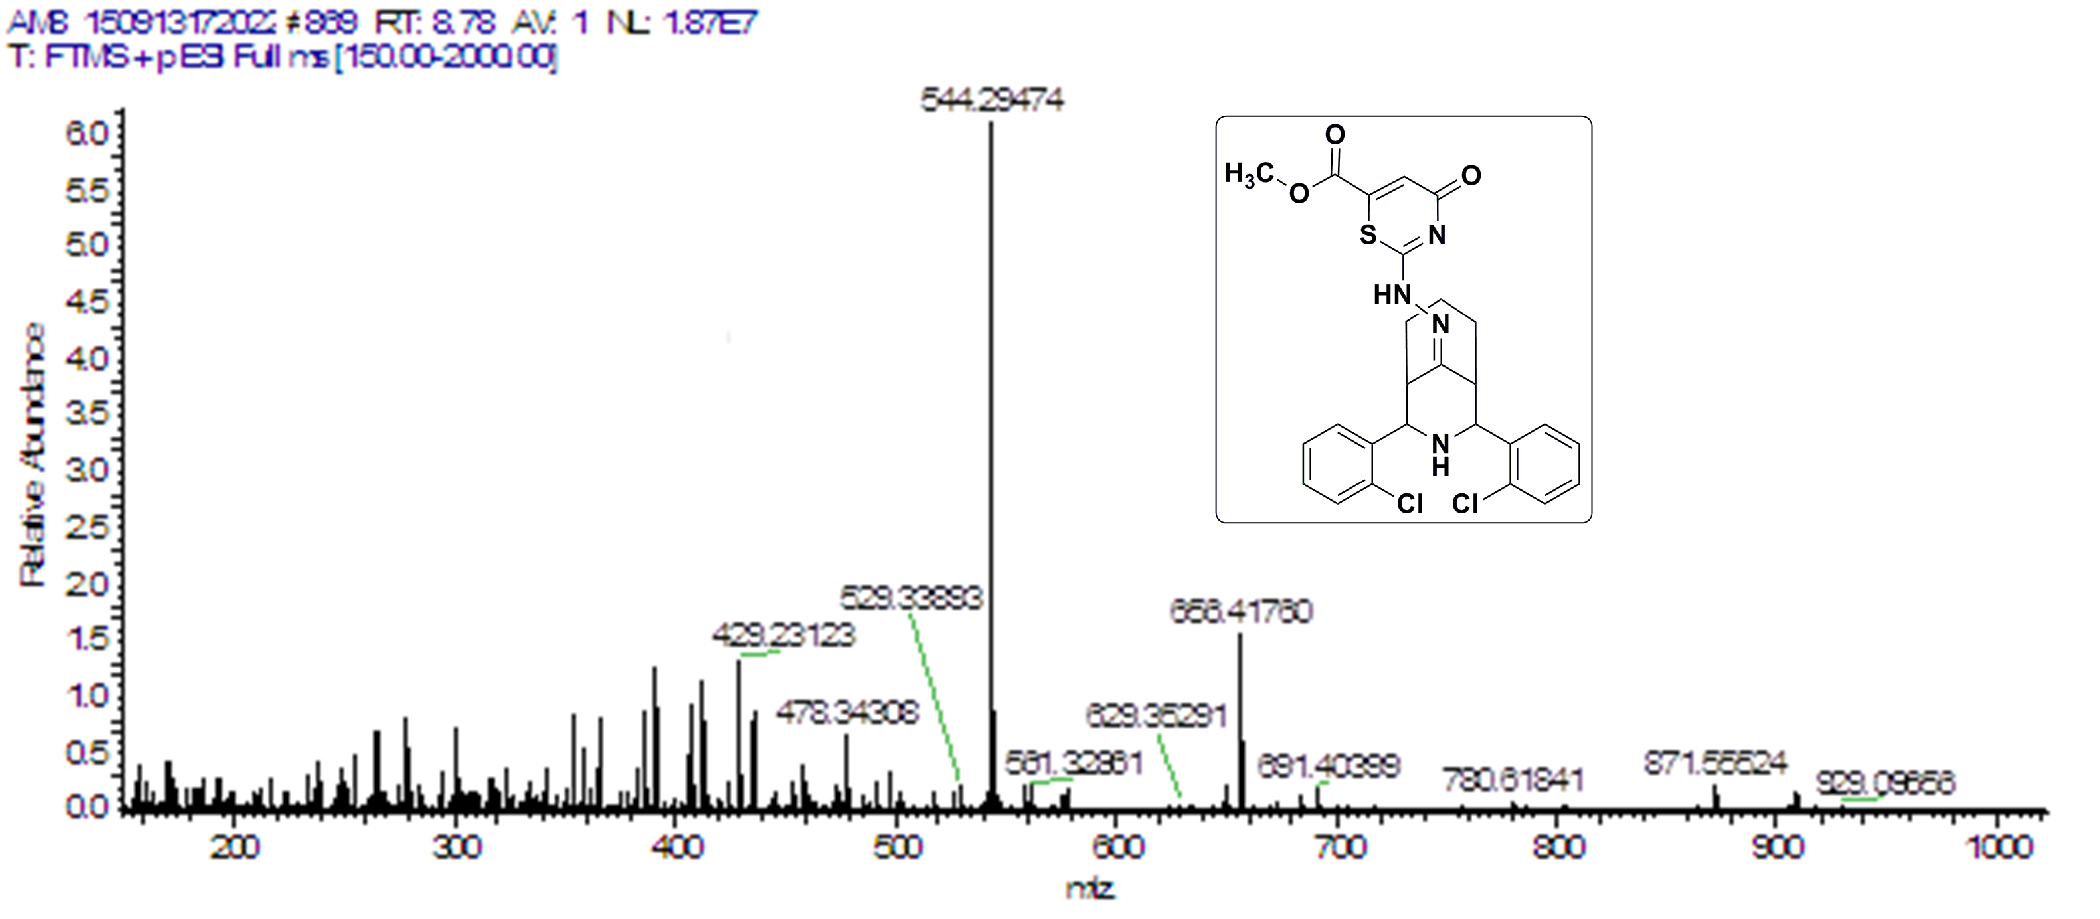


**Figure S 16:** Mass spectrum of compound **4**


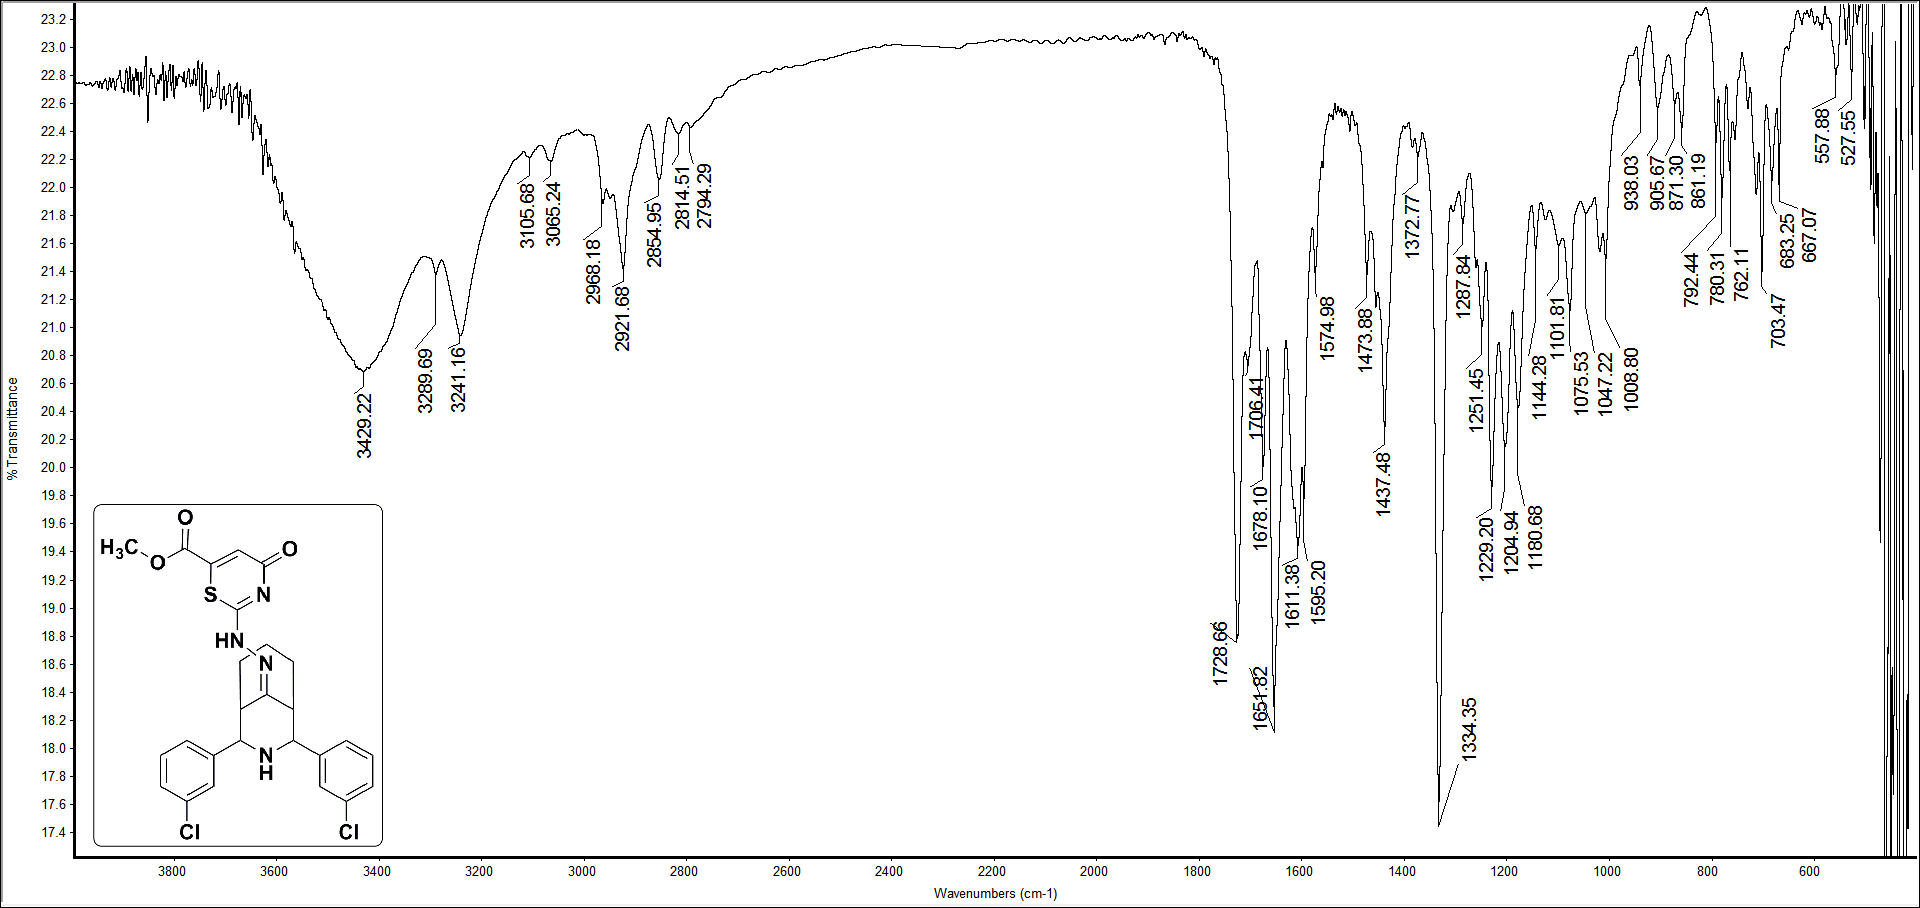


**Figure S 17:** FTIR spectrum of compound **5**


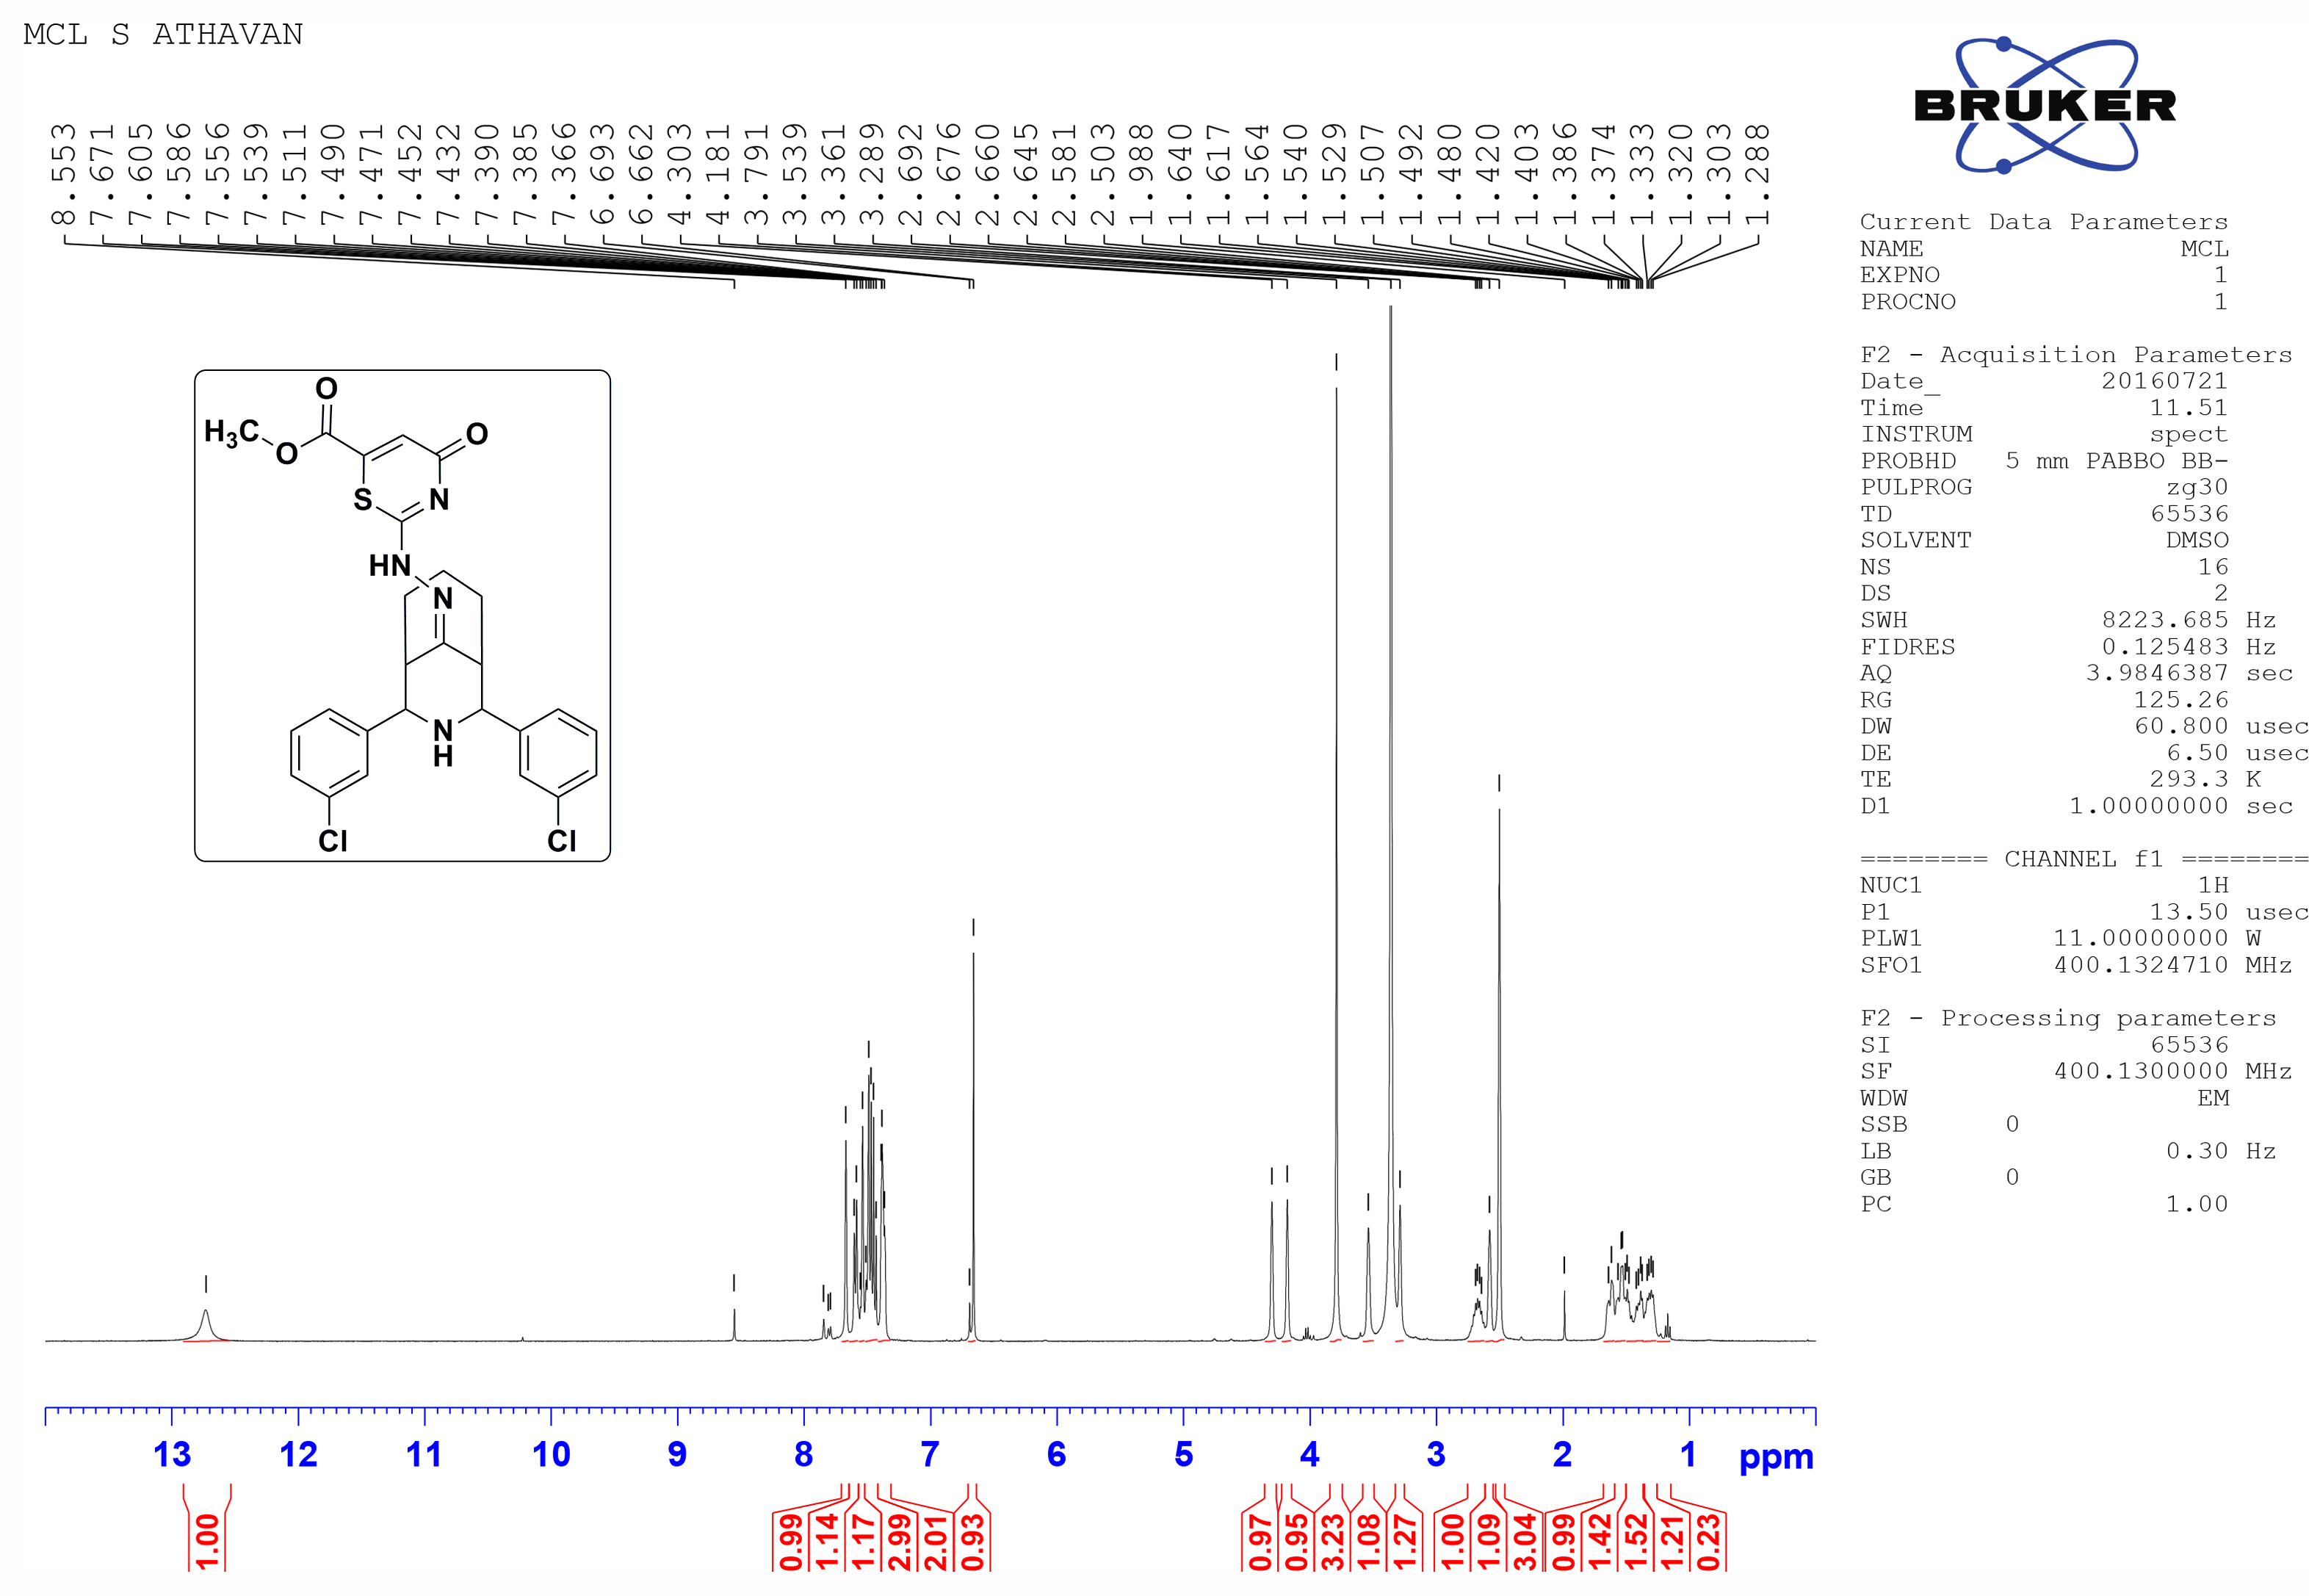


**Figure S 18:** 1H NMR of compound **5**


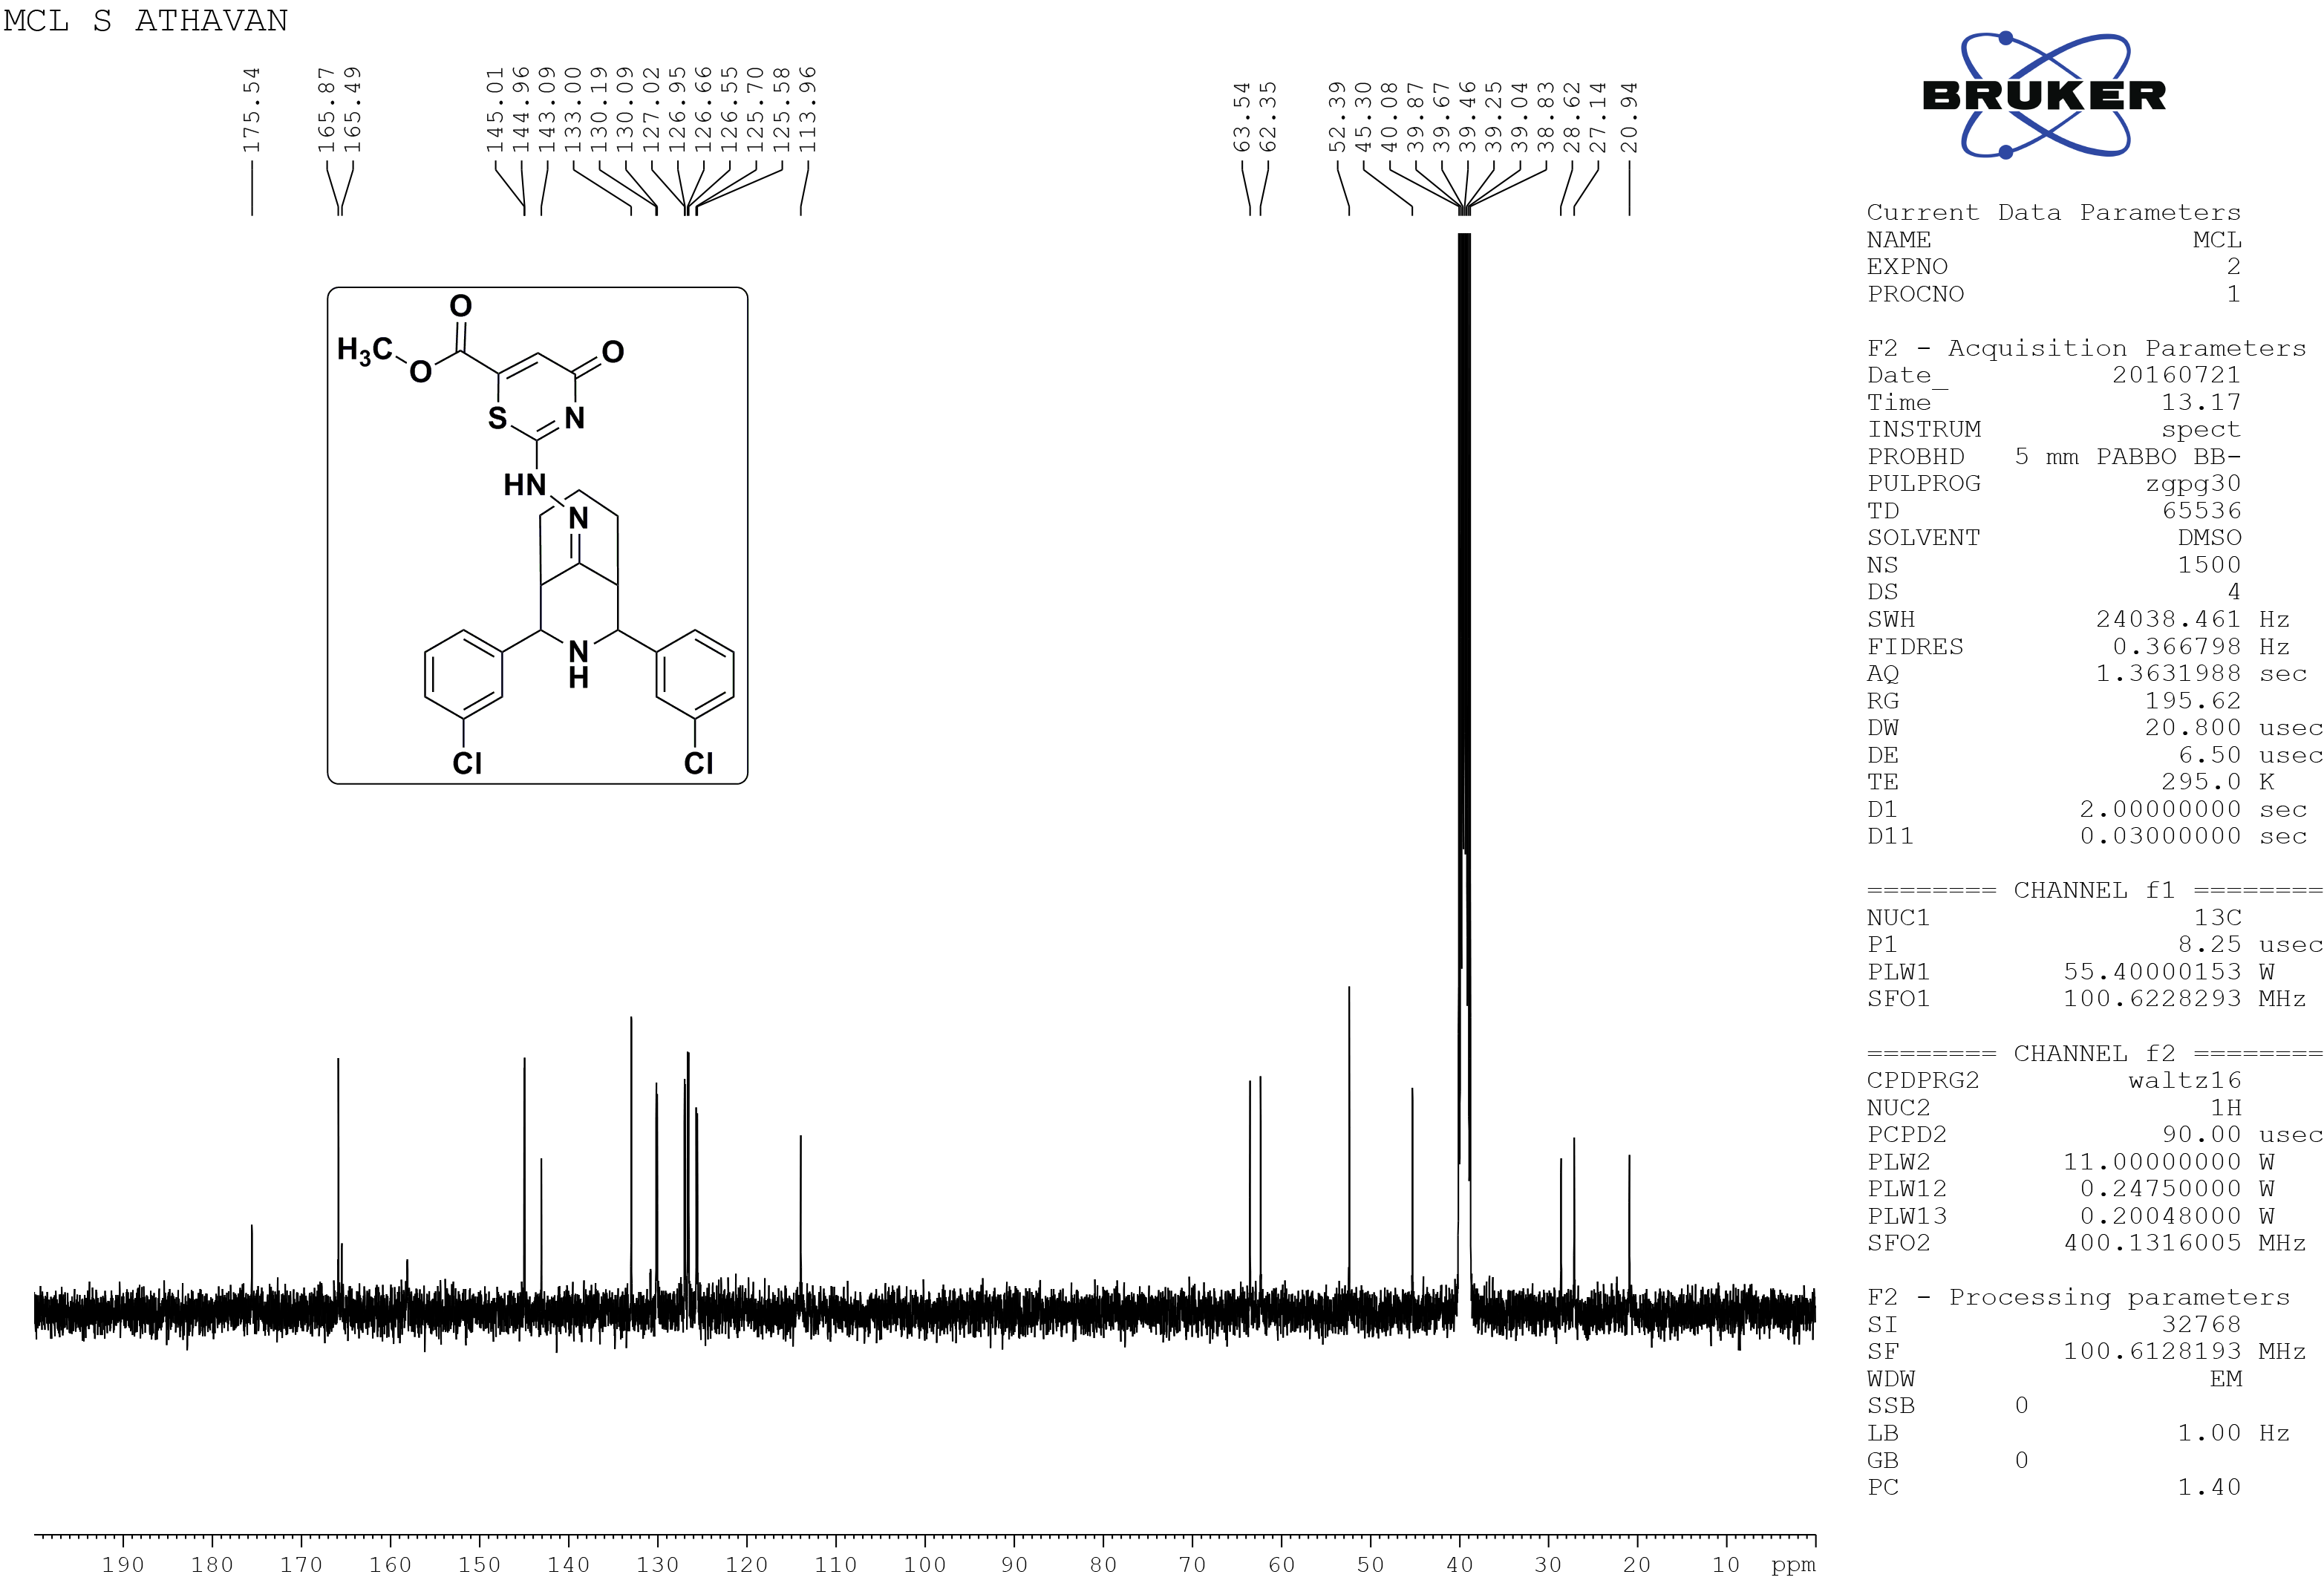


**Figure S 19:** 13C NMR of compound **5**

**
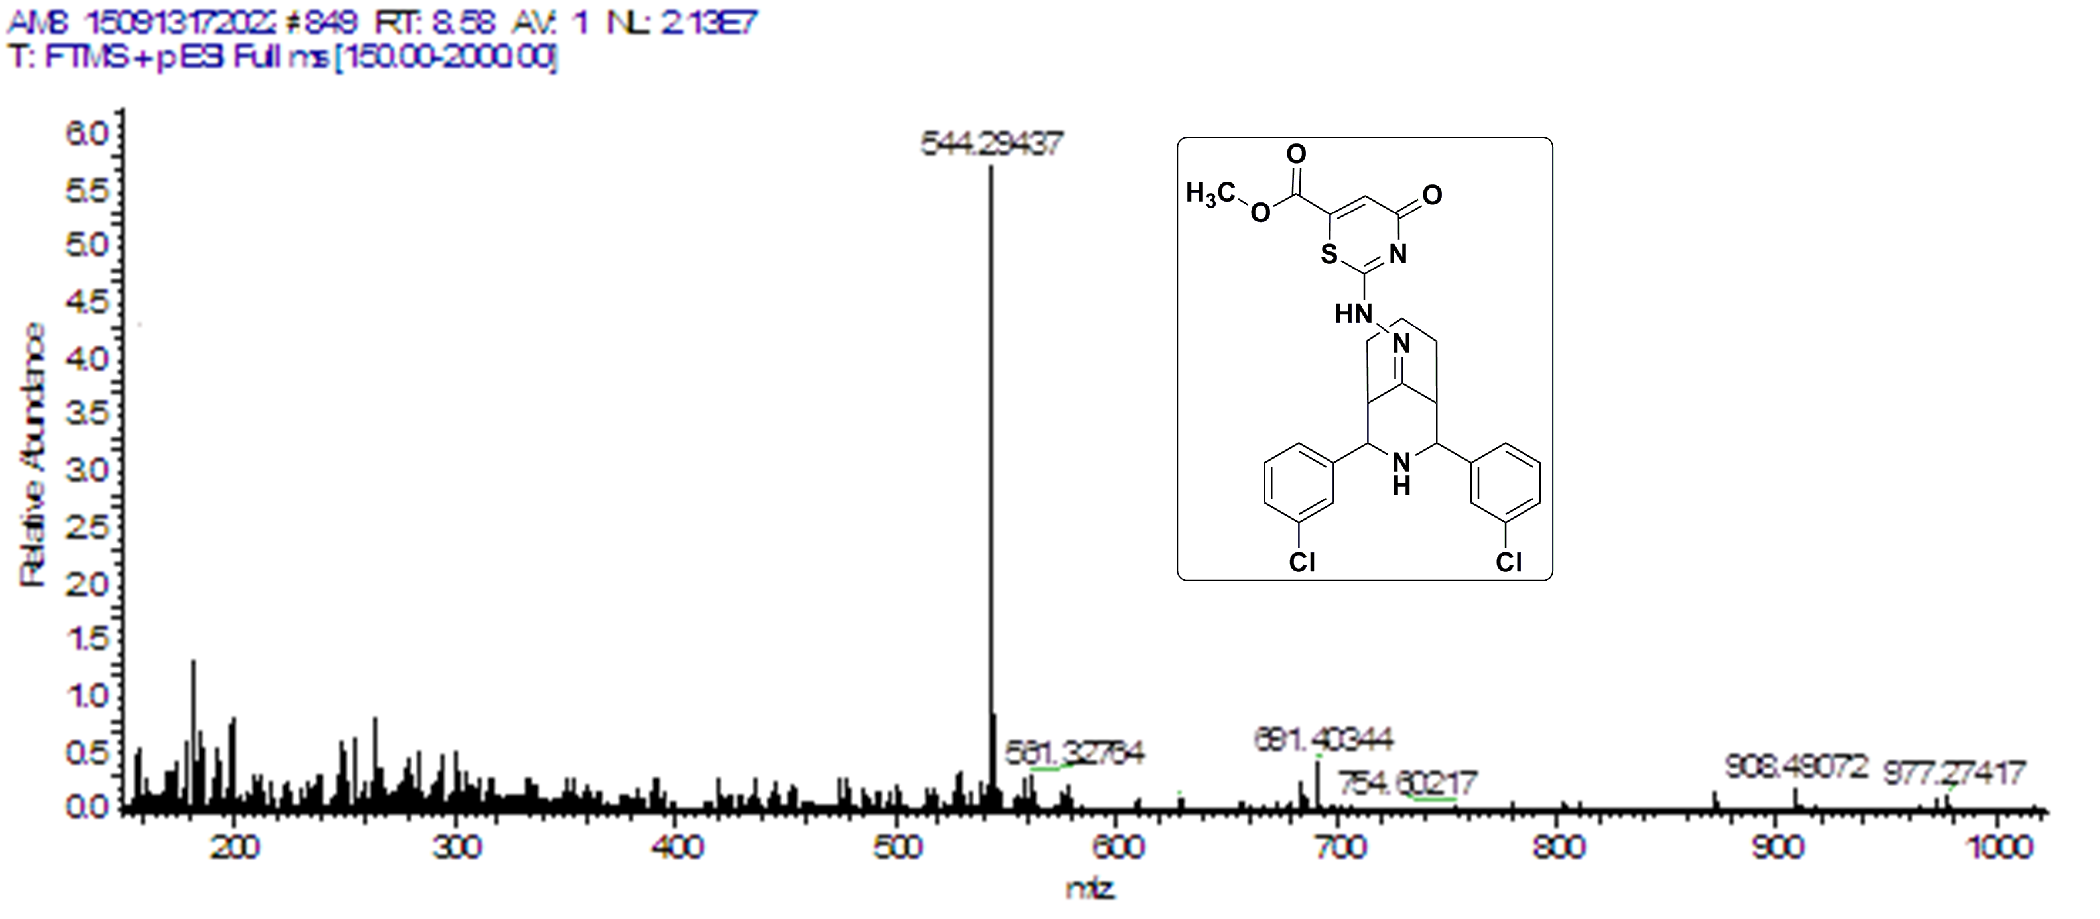
**

**Figure S 20:** Mass spectrum of compound **5**


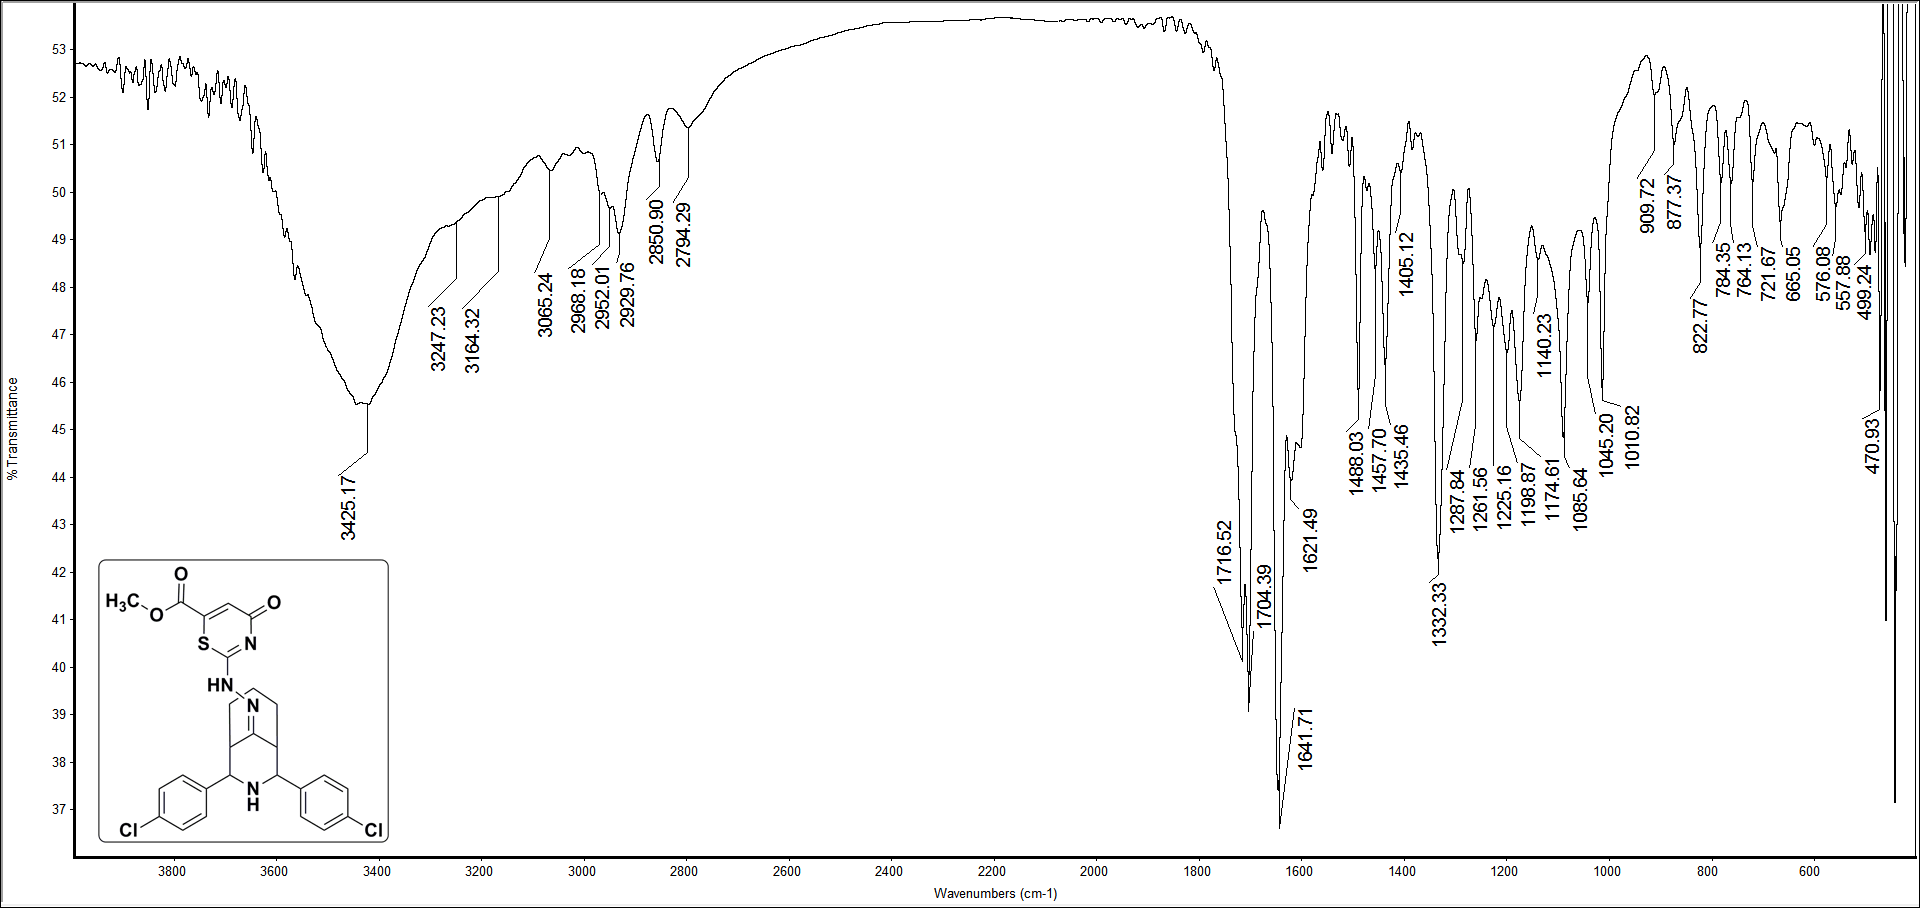


**Figure S 21:** FTIR spectrum of compound **6**


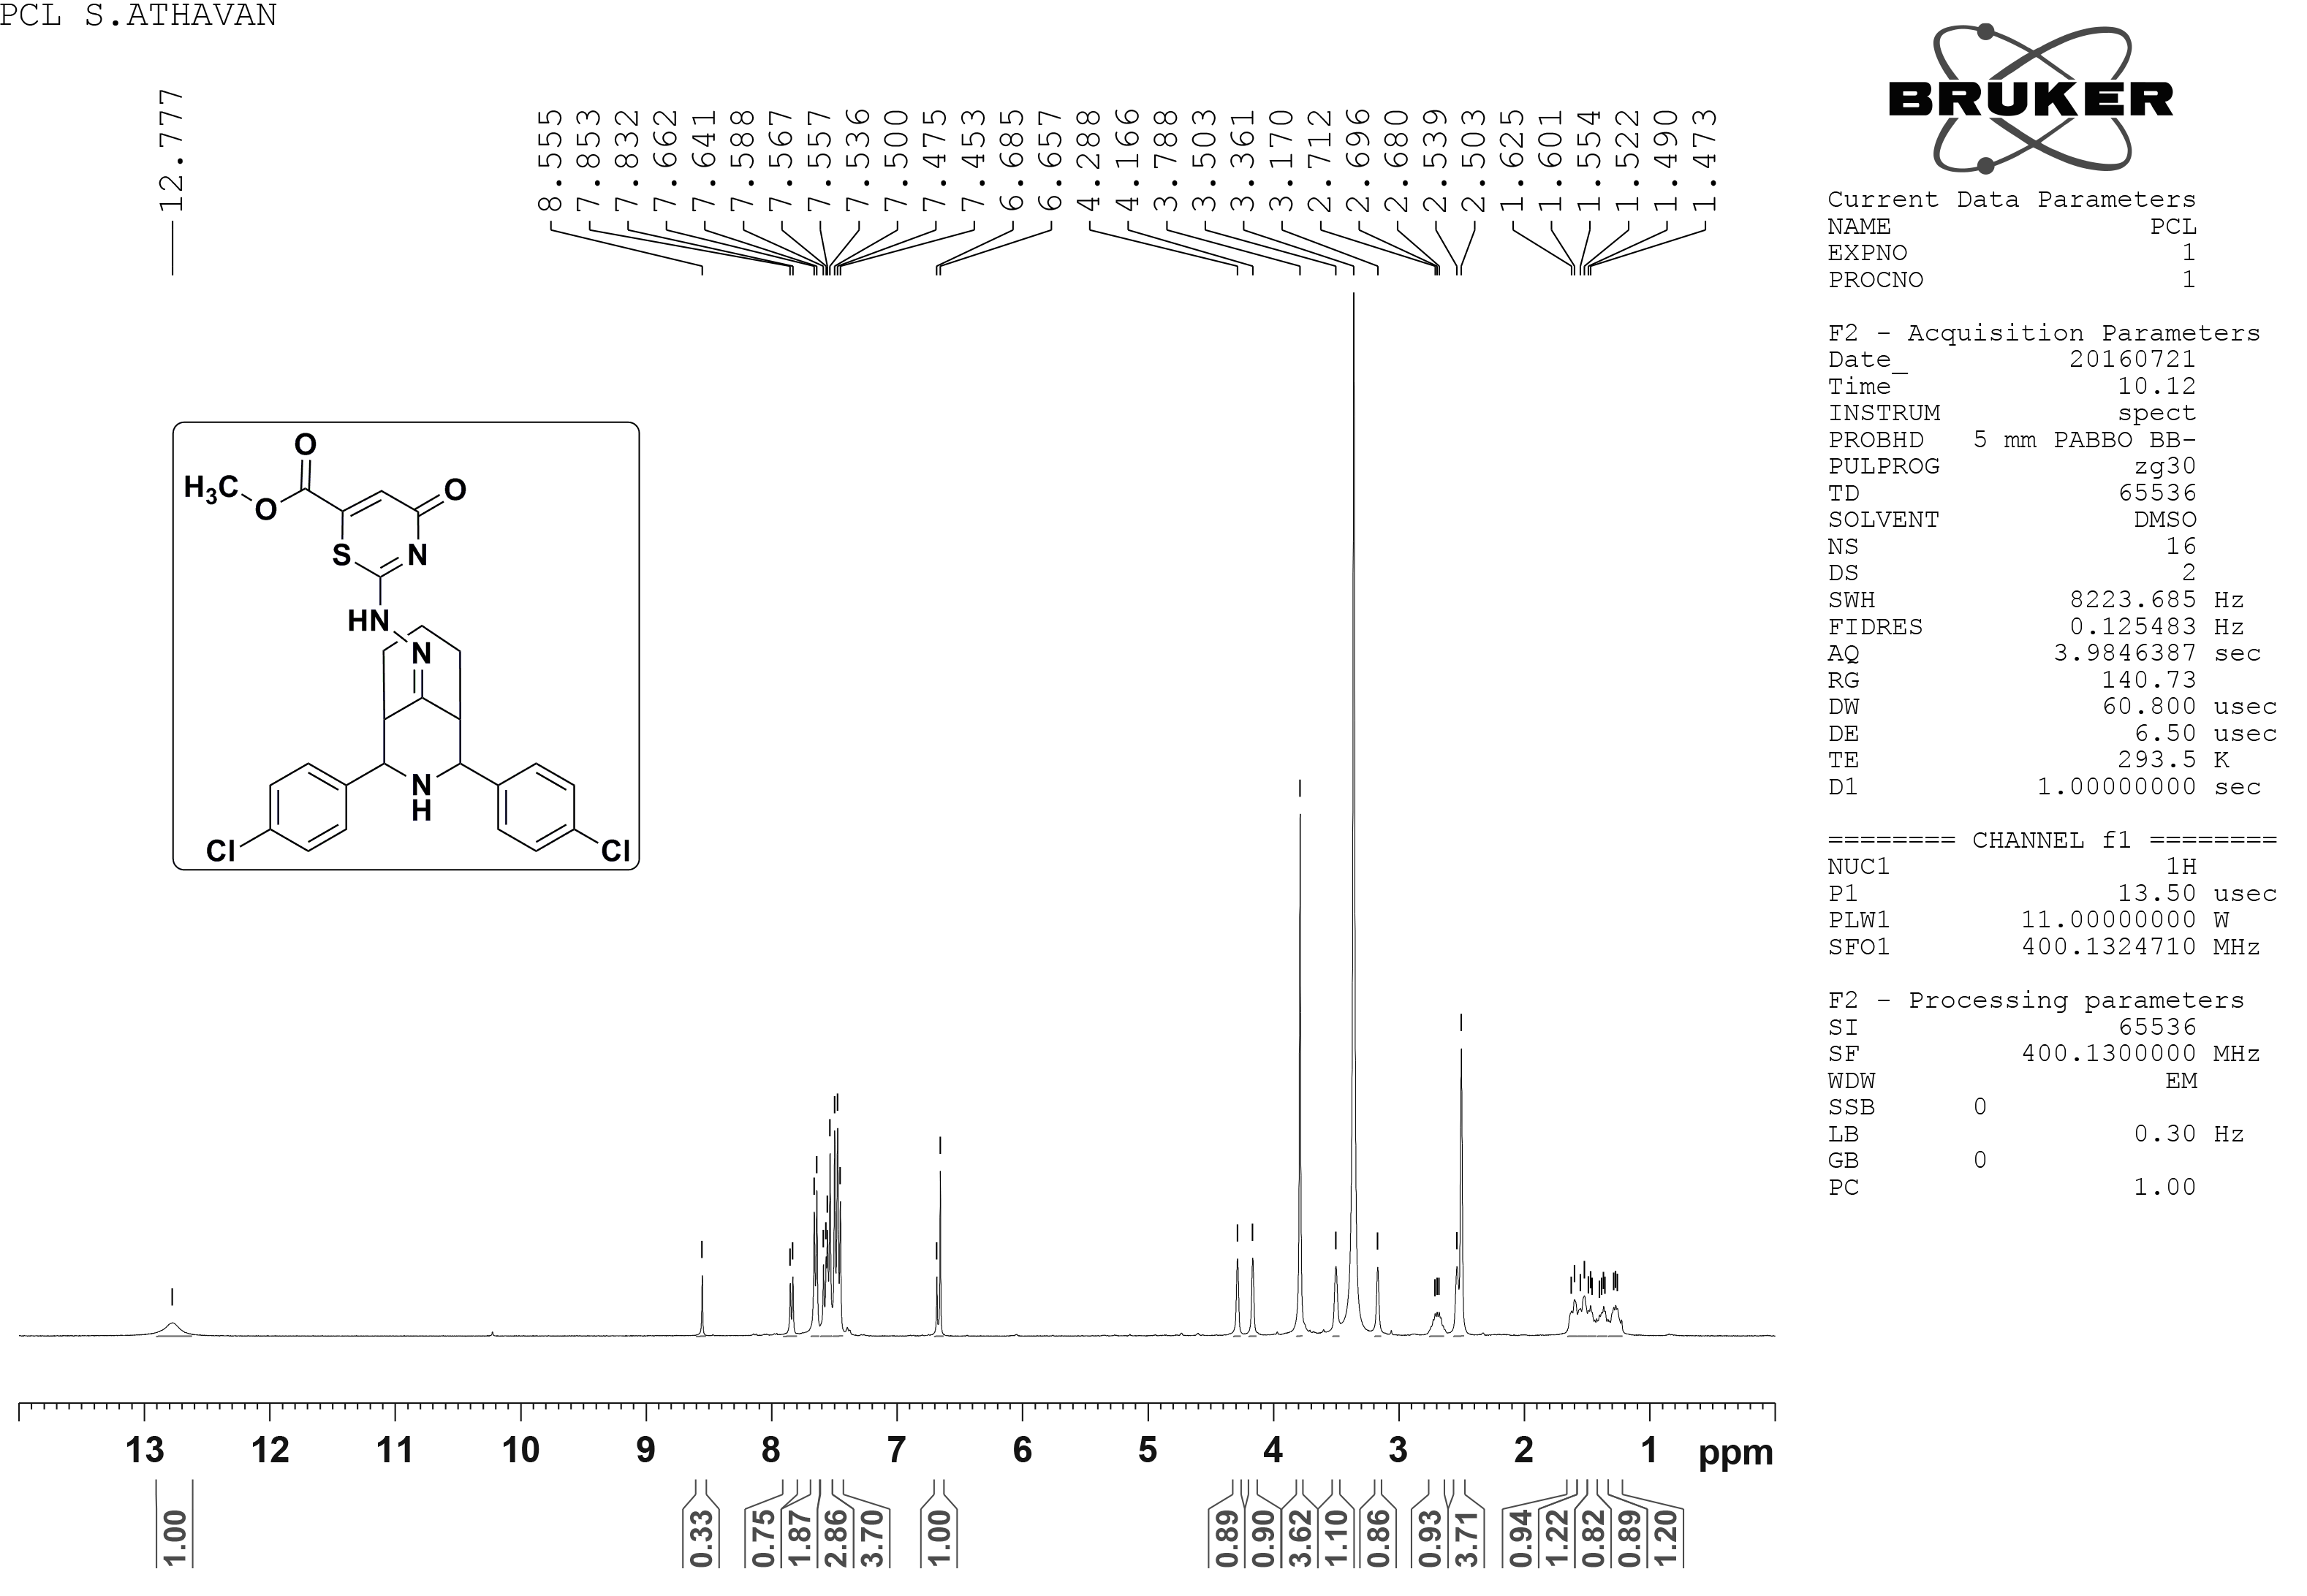


**Figure S 22:** 1H NMR of compound **6**


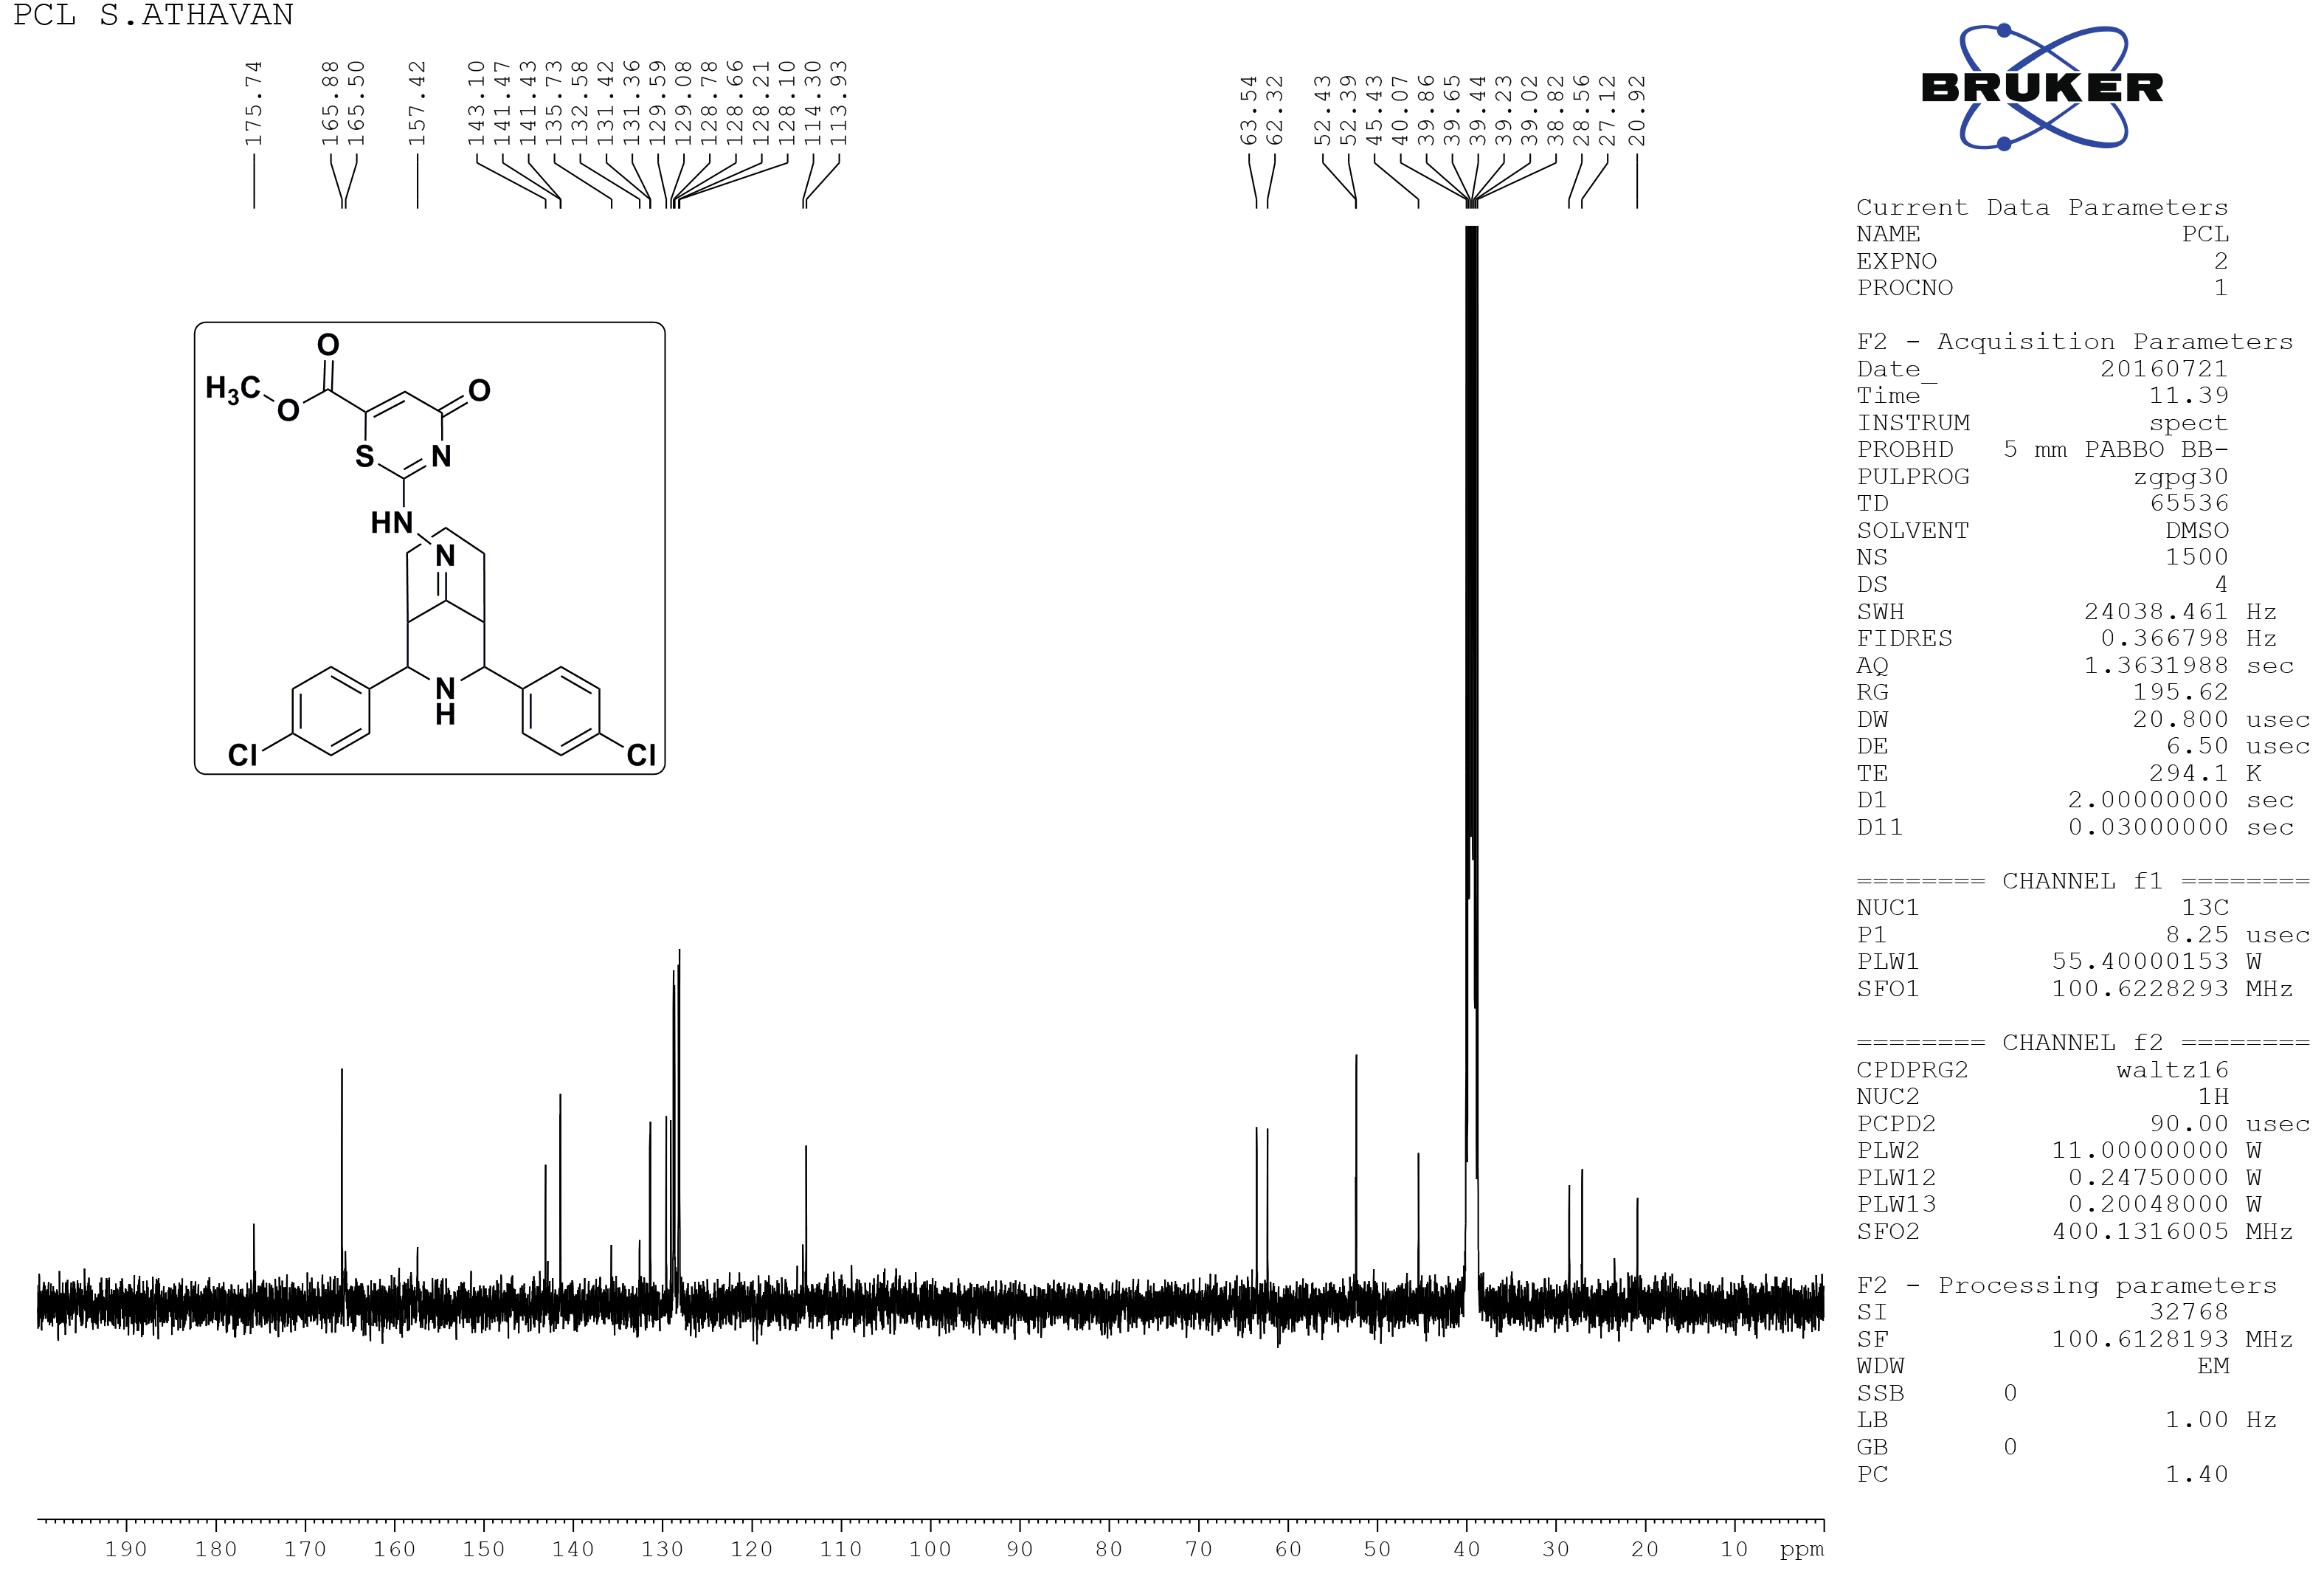


**Figure S 23:** 13C NMR of compound **6**

**
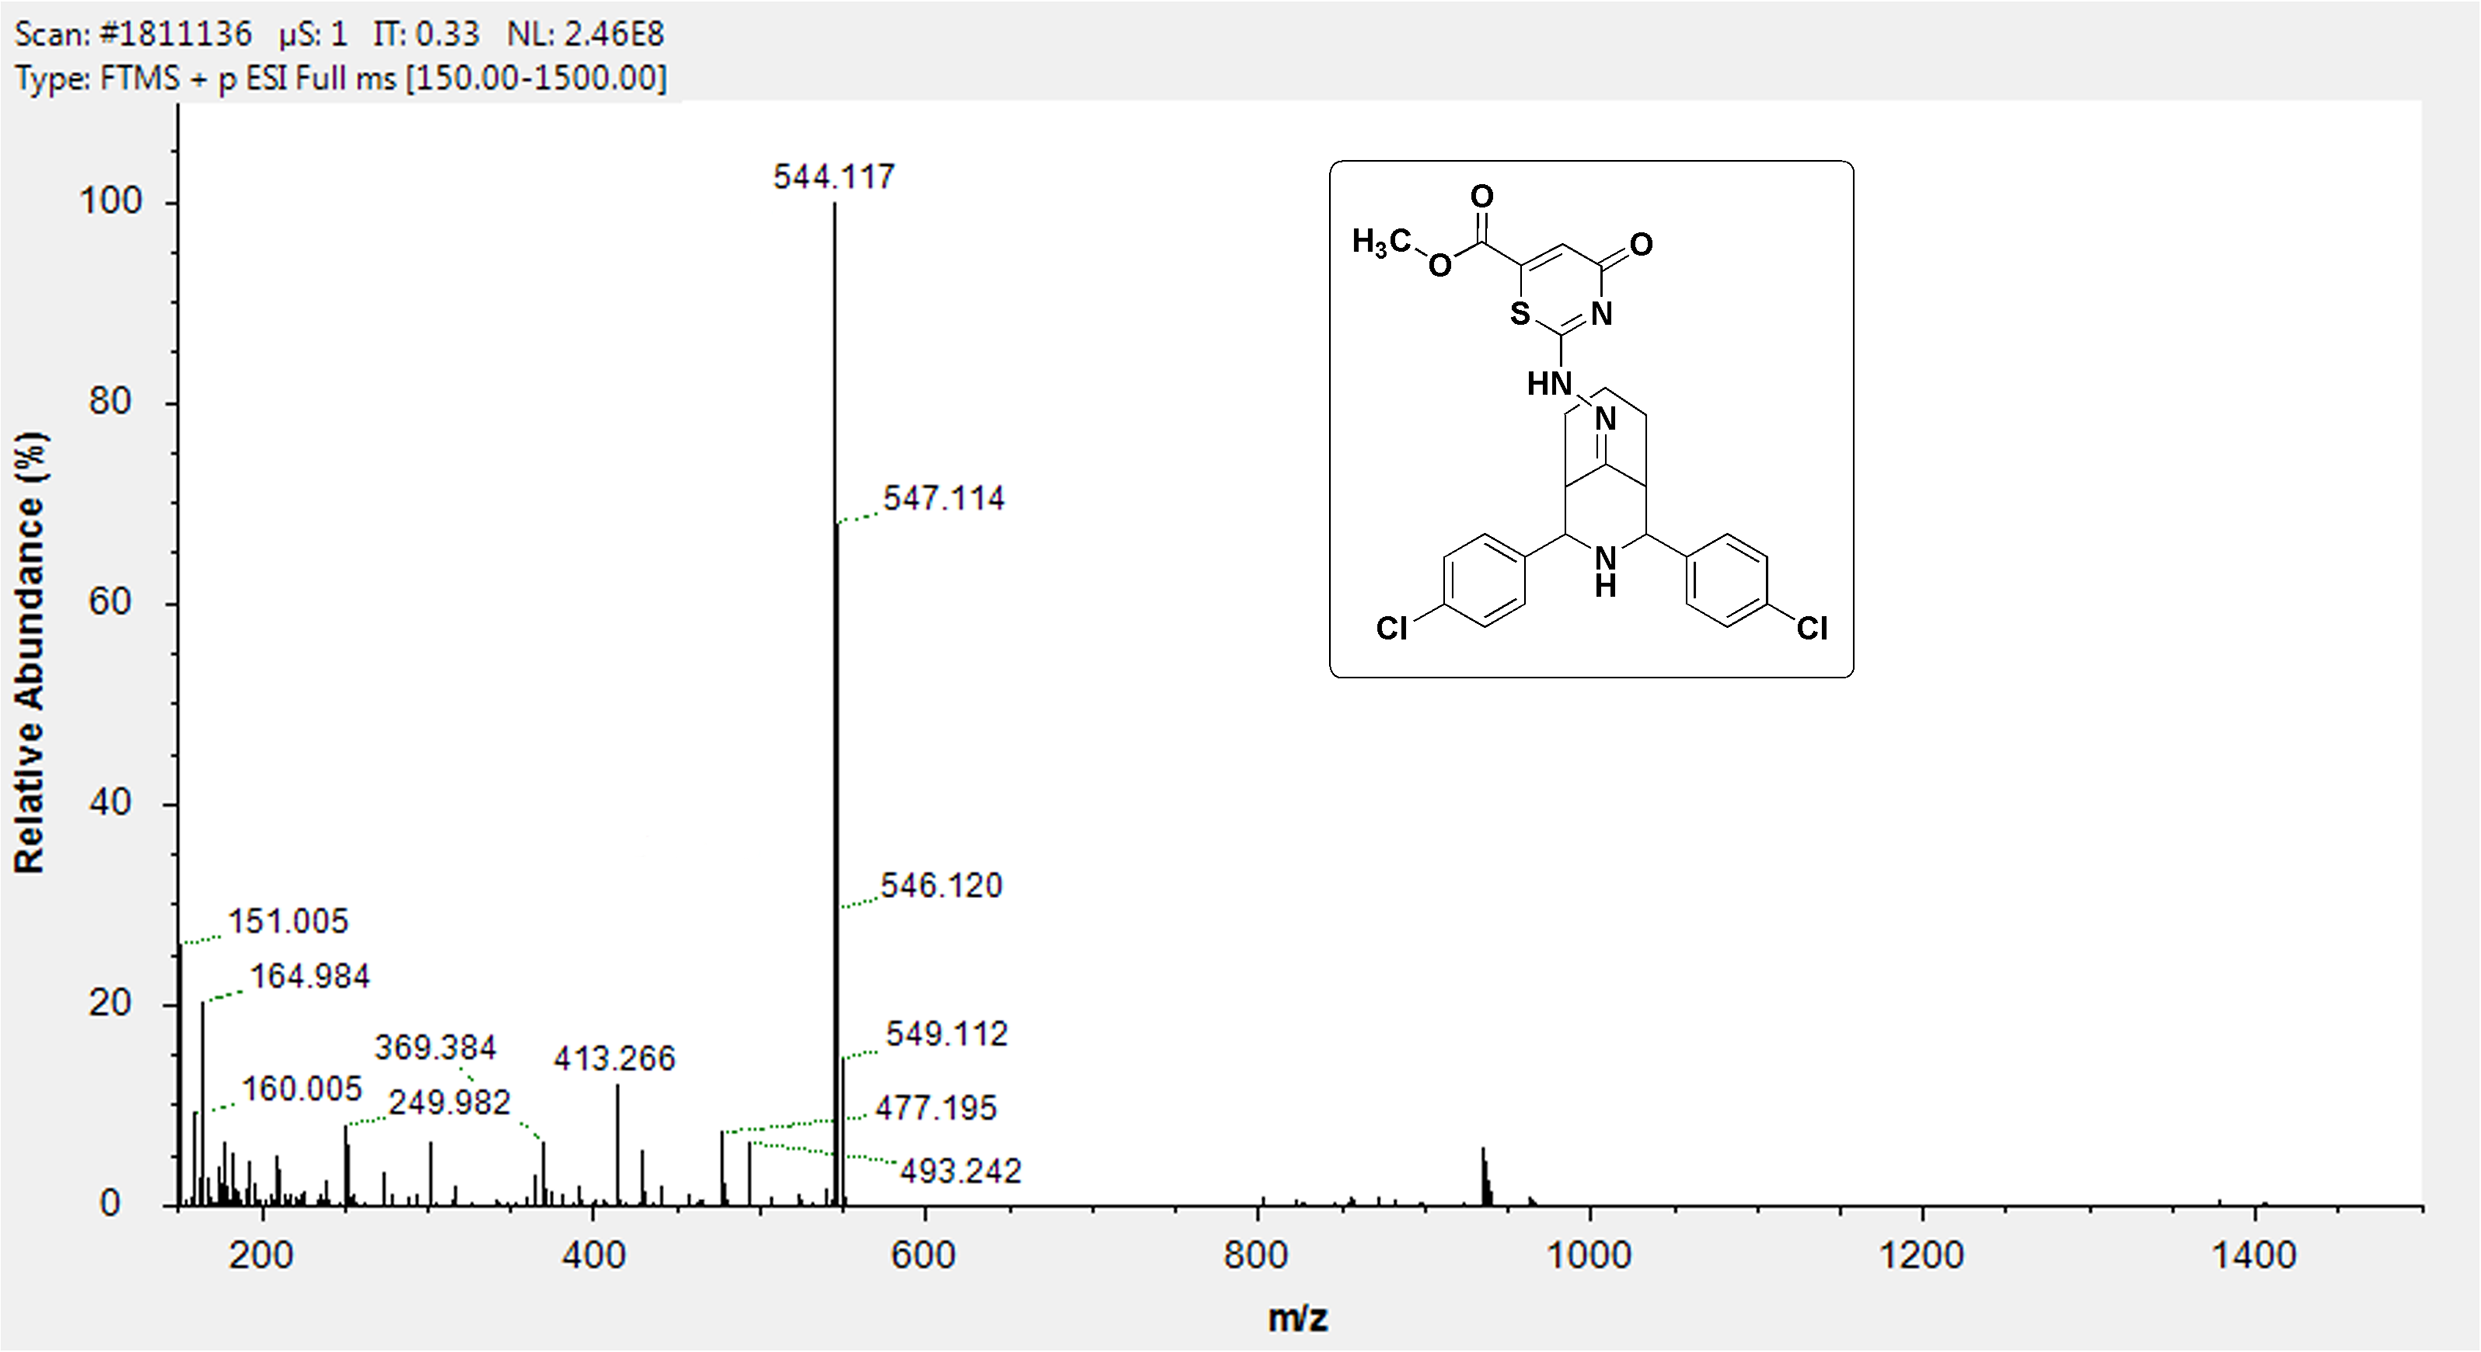
**

**Figure S 24:** Mass spectrum of compound **6**


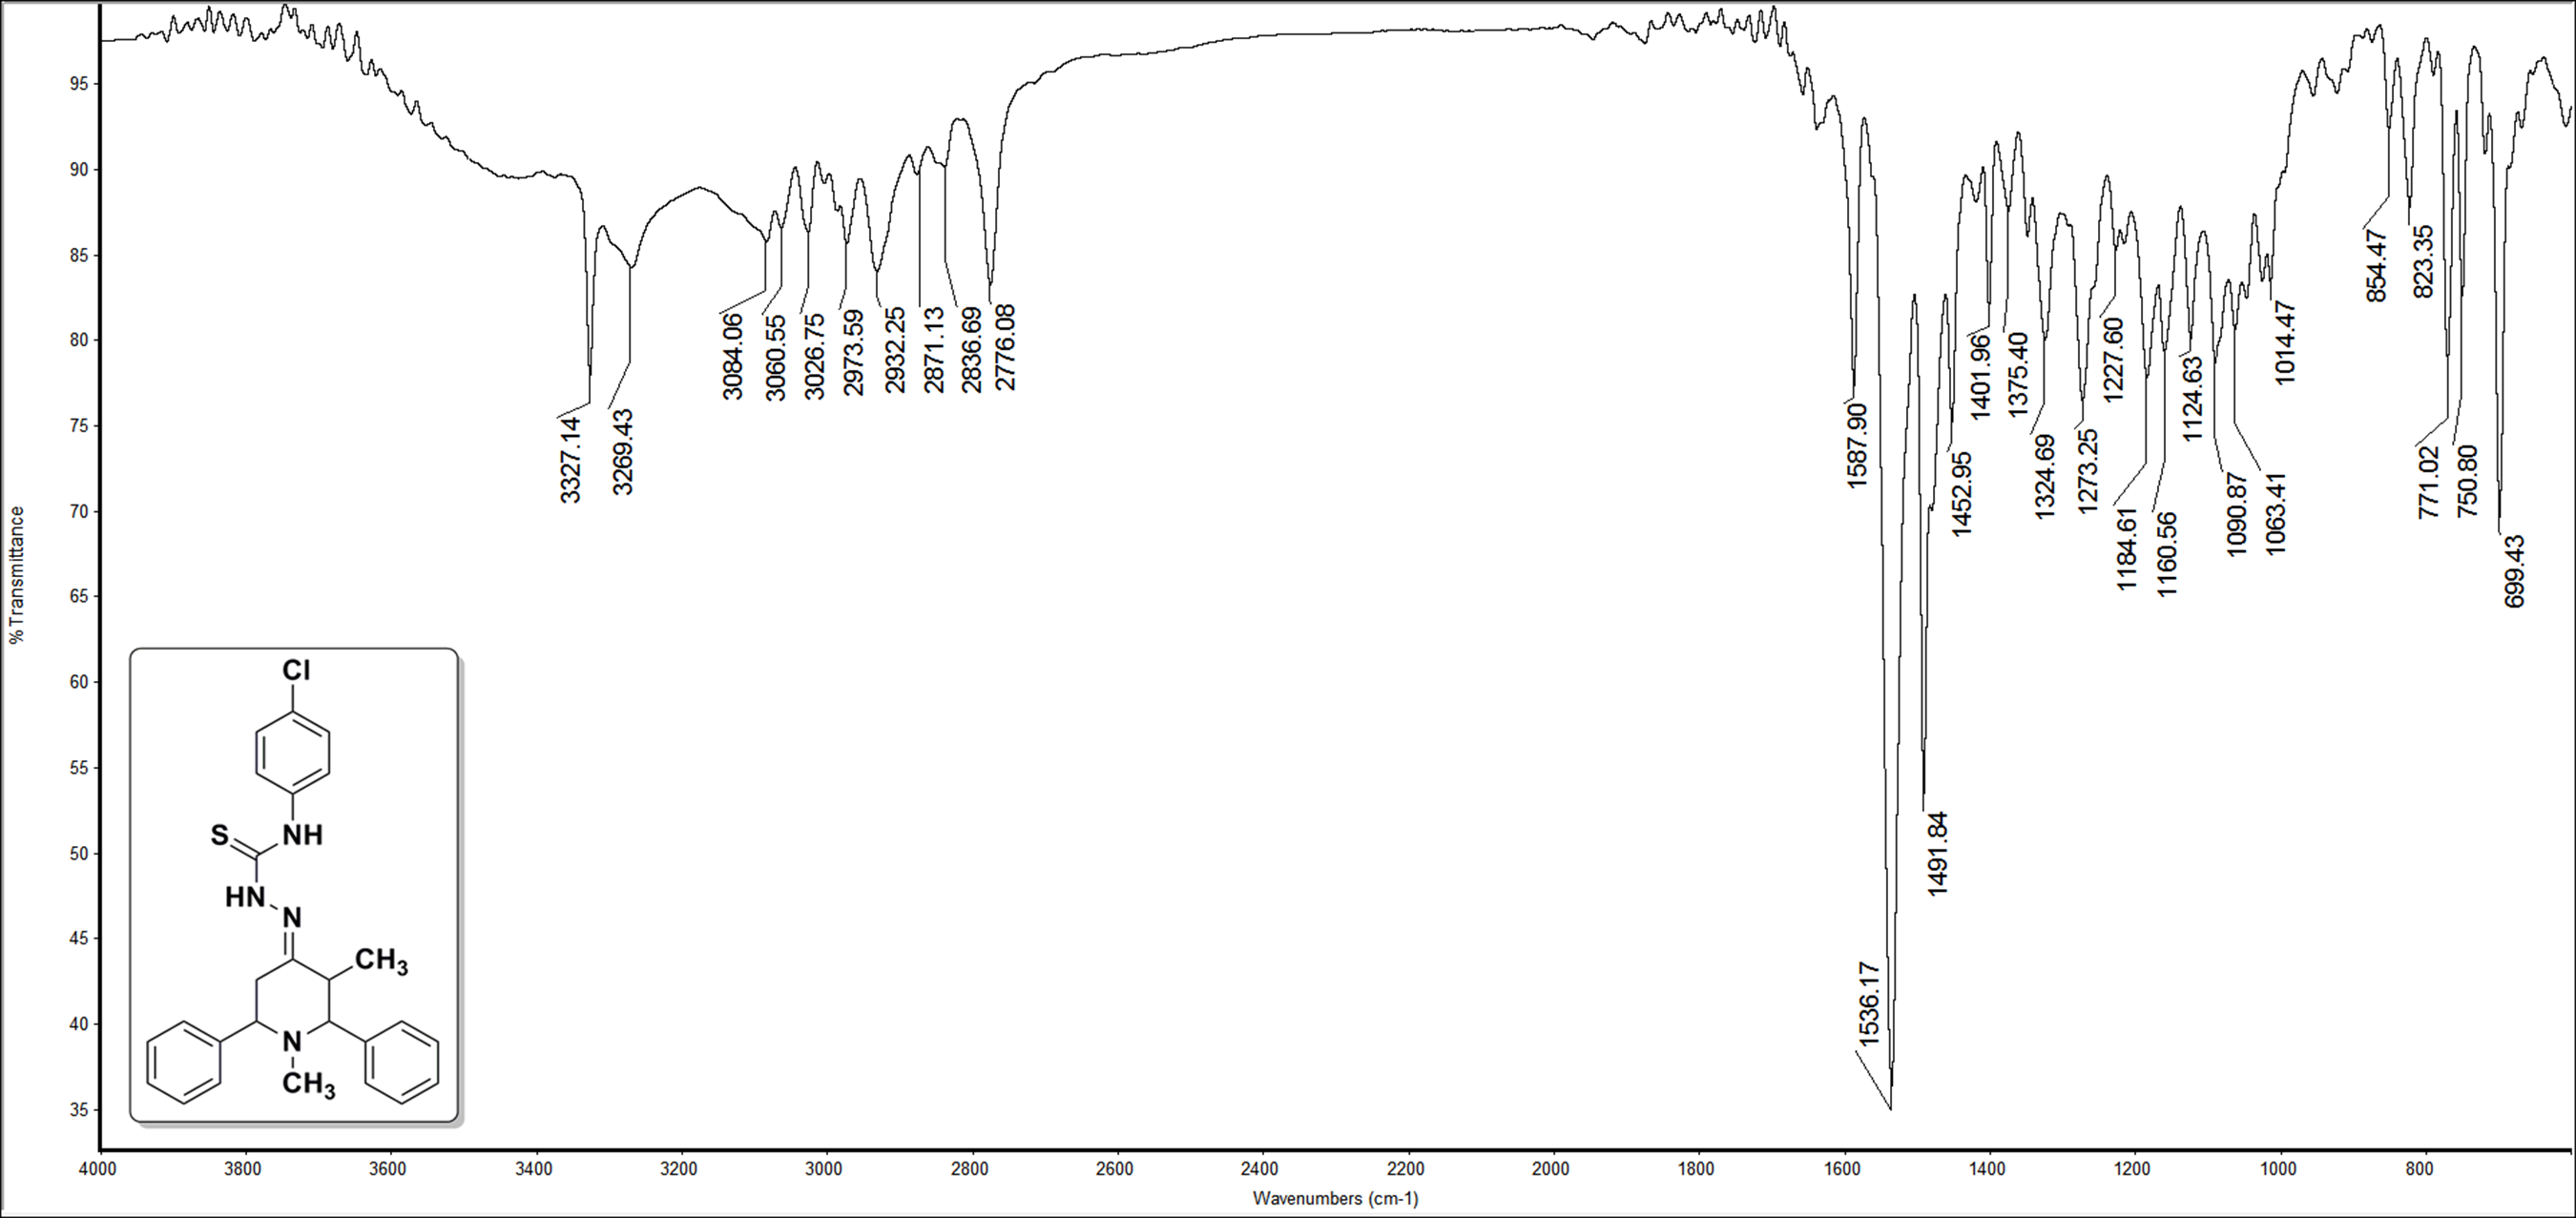


**Figure S 25:** FTIR spectrum of compound **7**


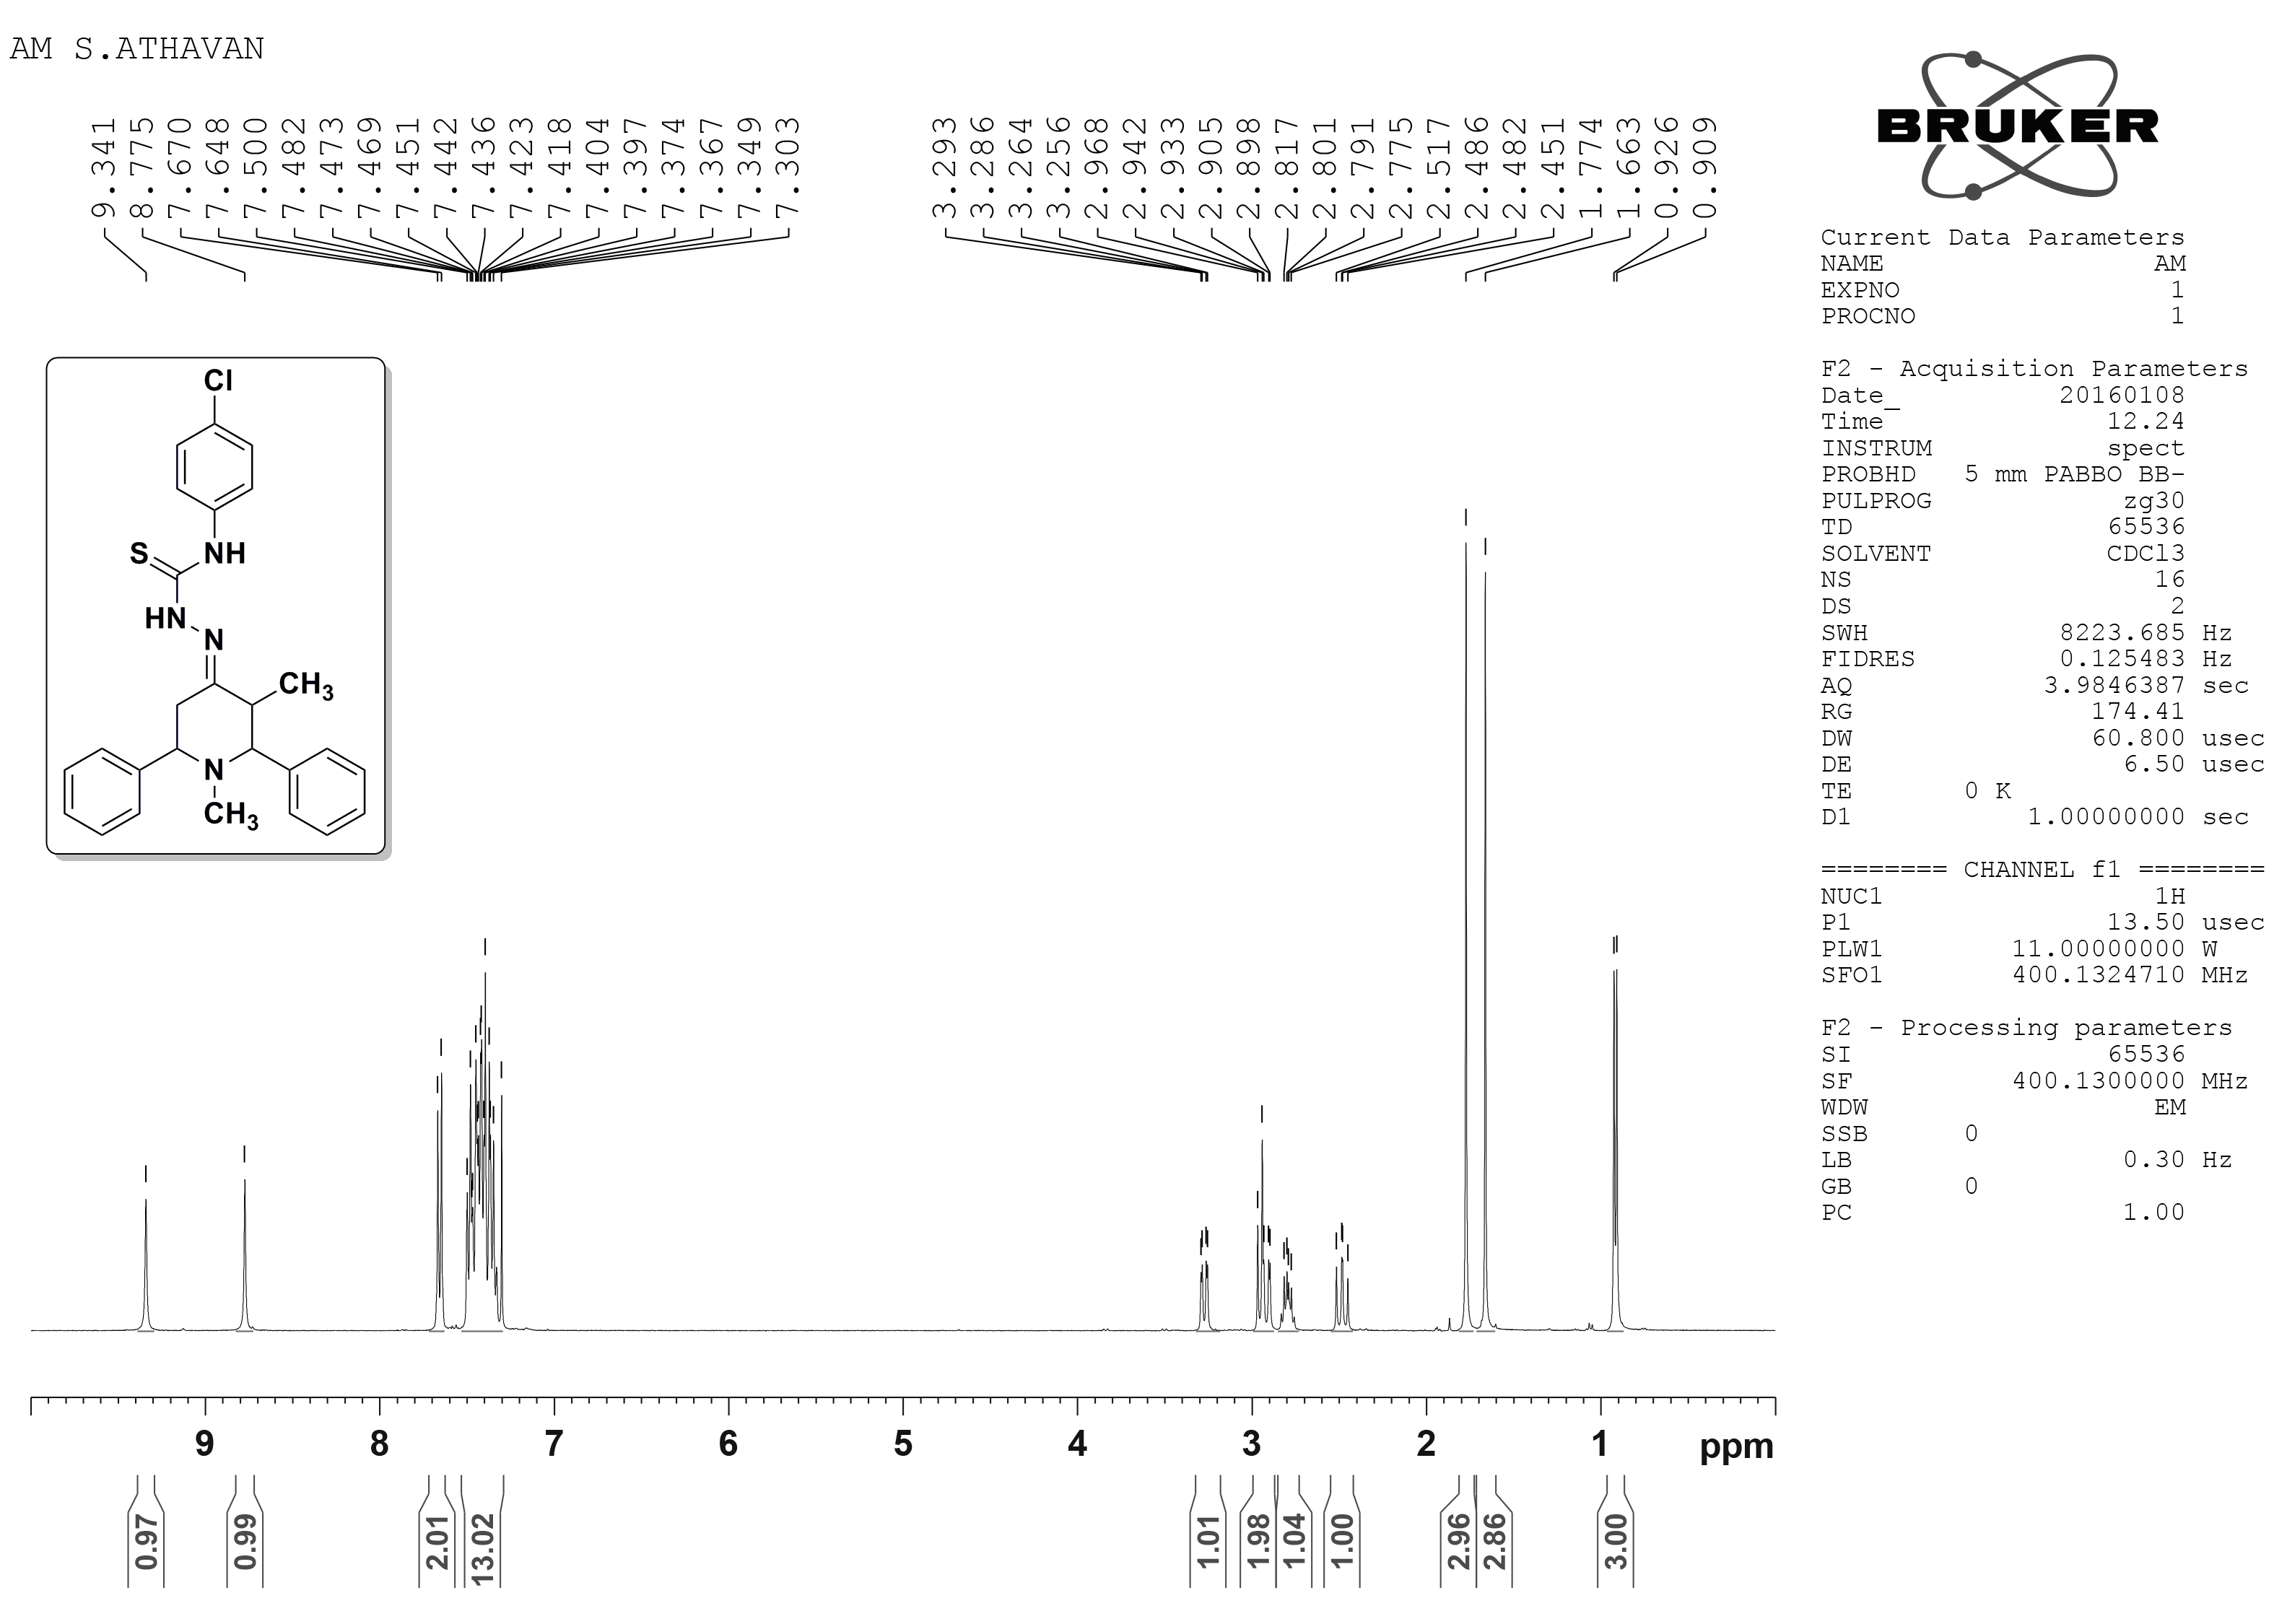


**Figure S 26:** 1H NMR of compound **7**


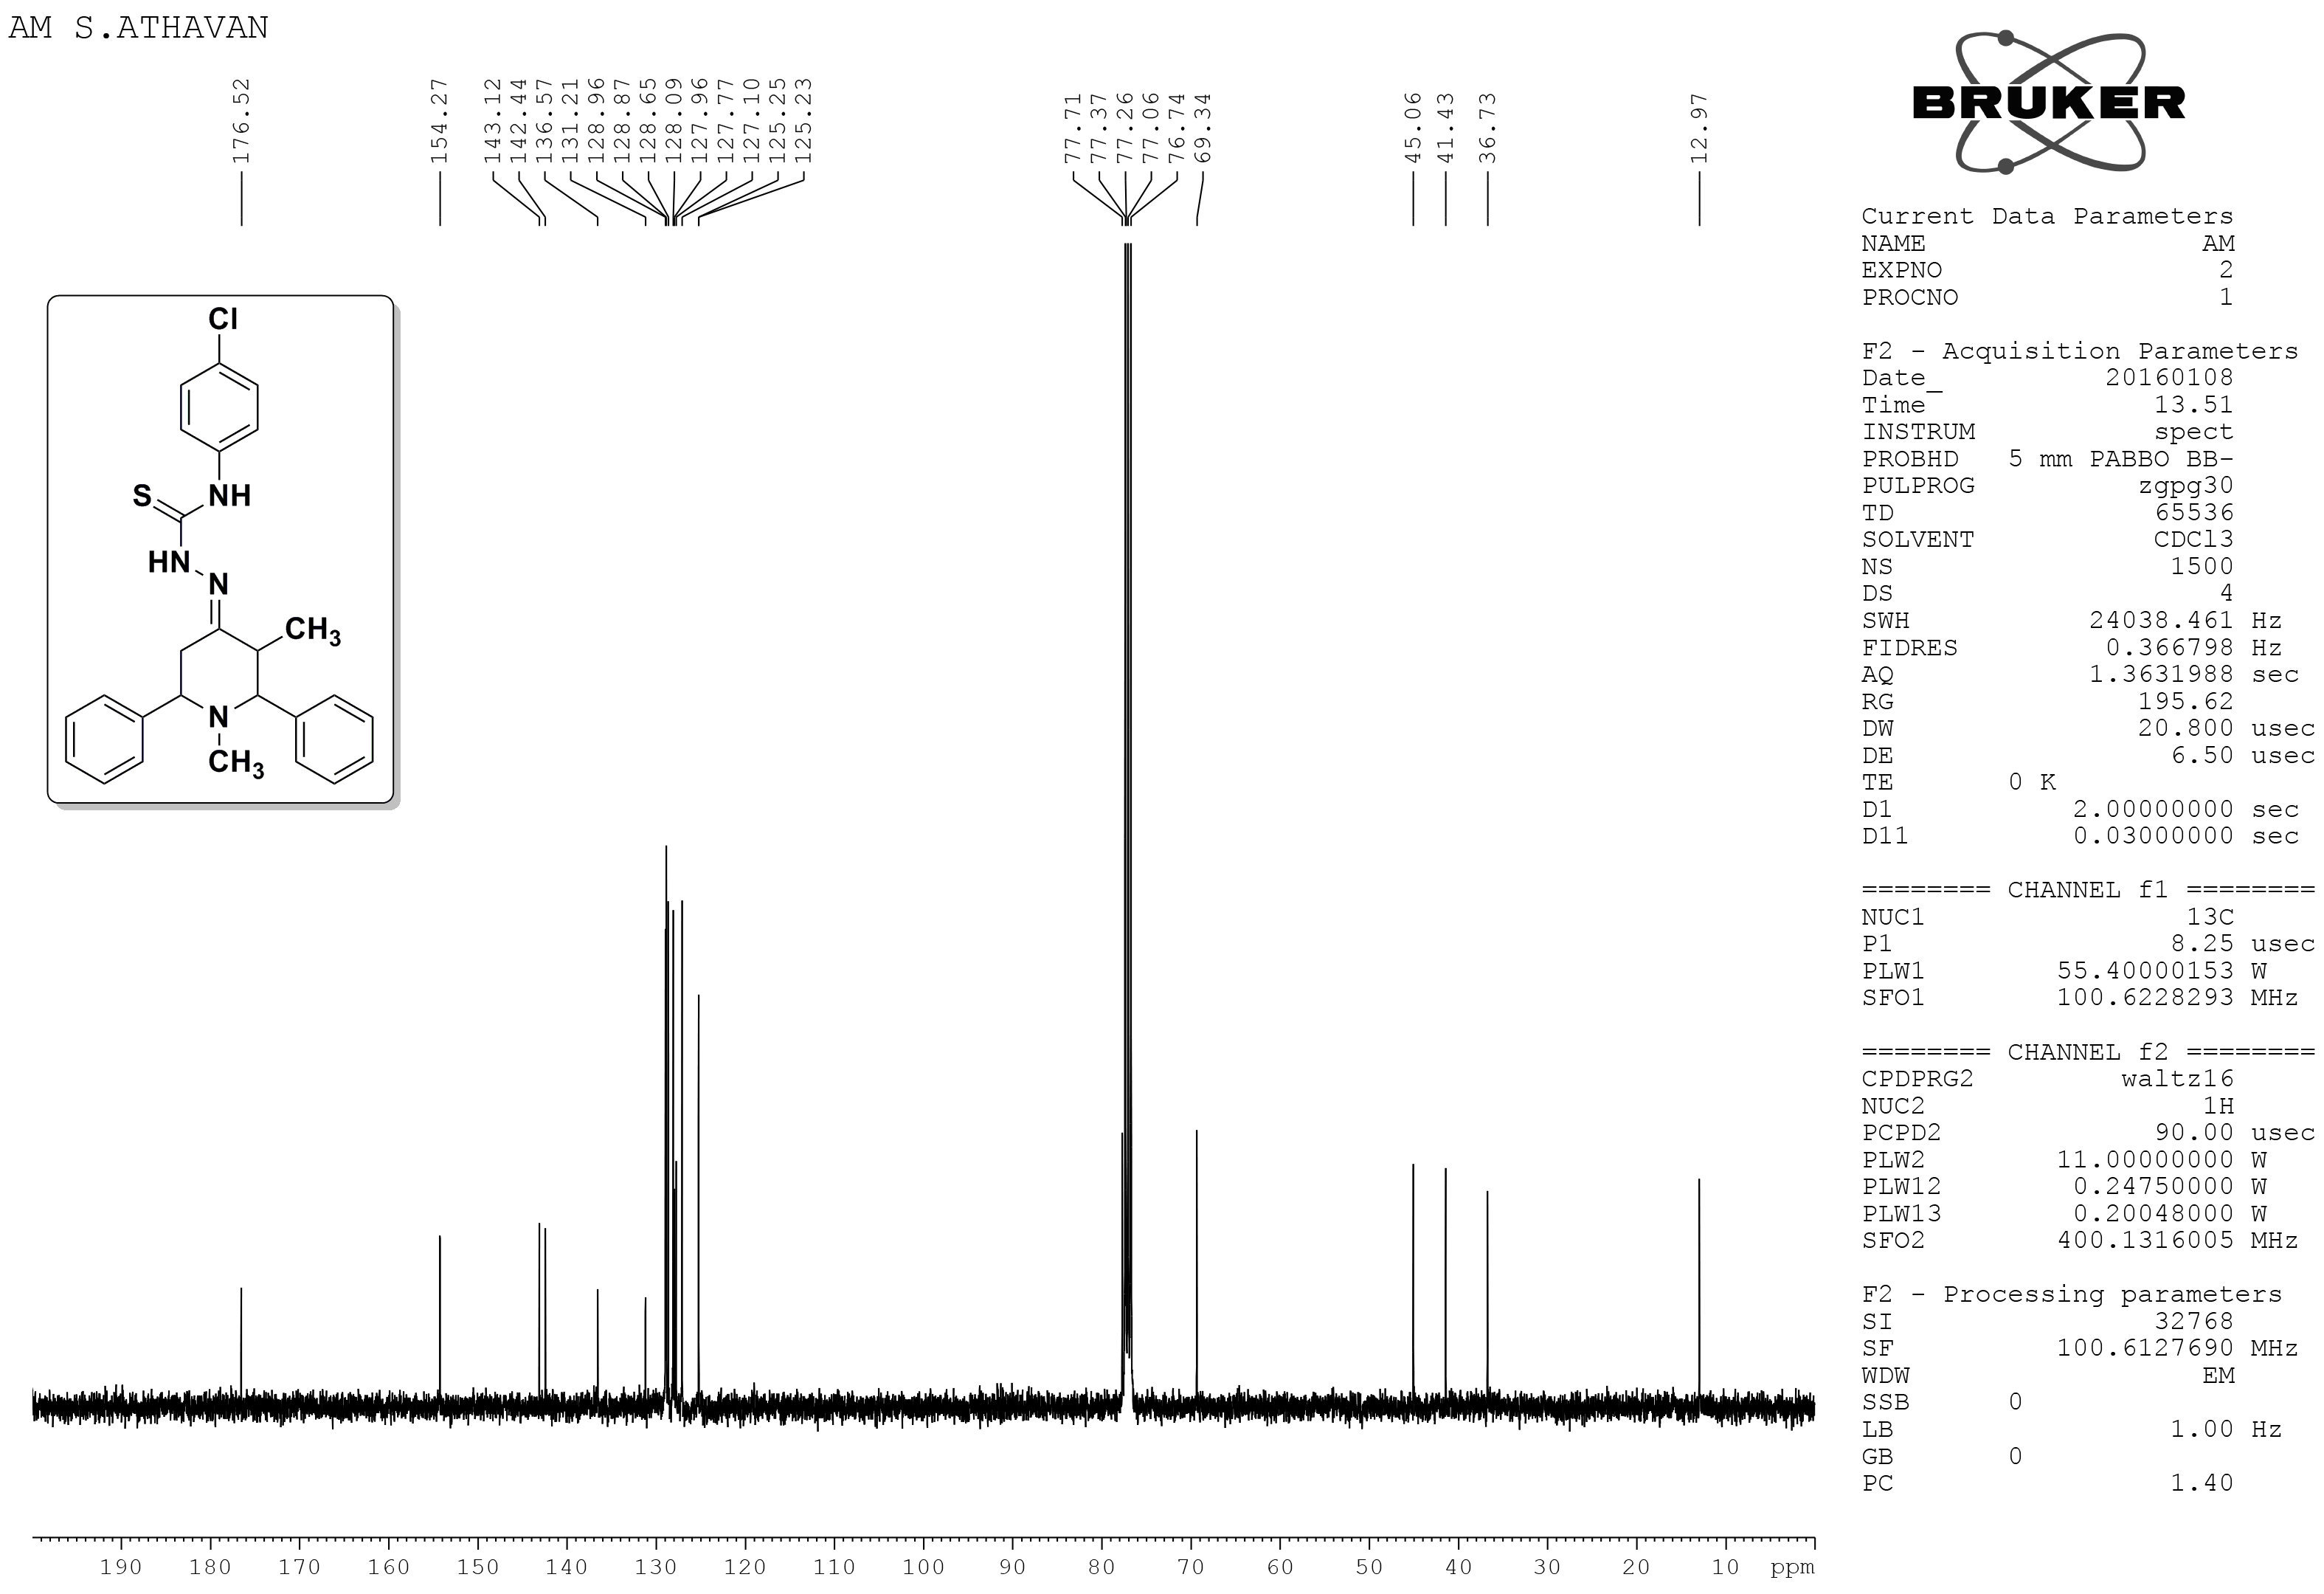


**Figure S 27:** 13C NMR of compound **7**


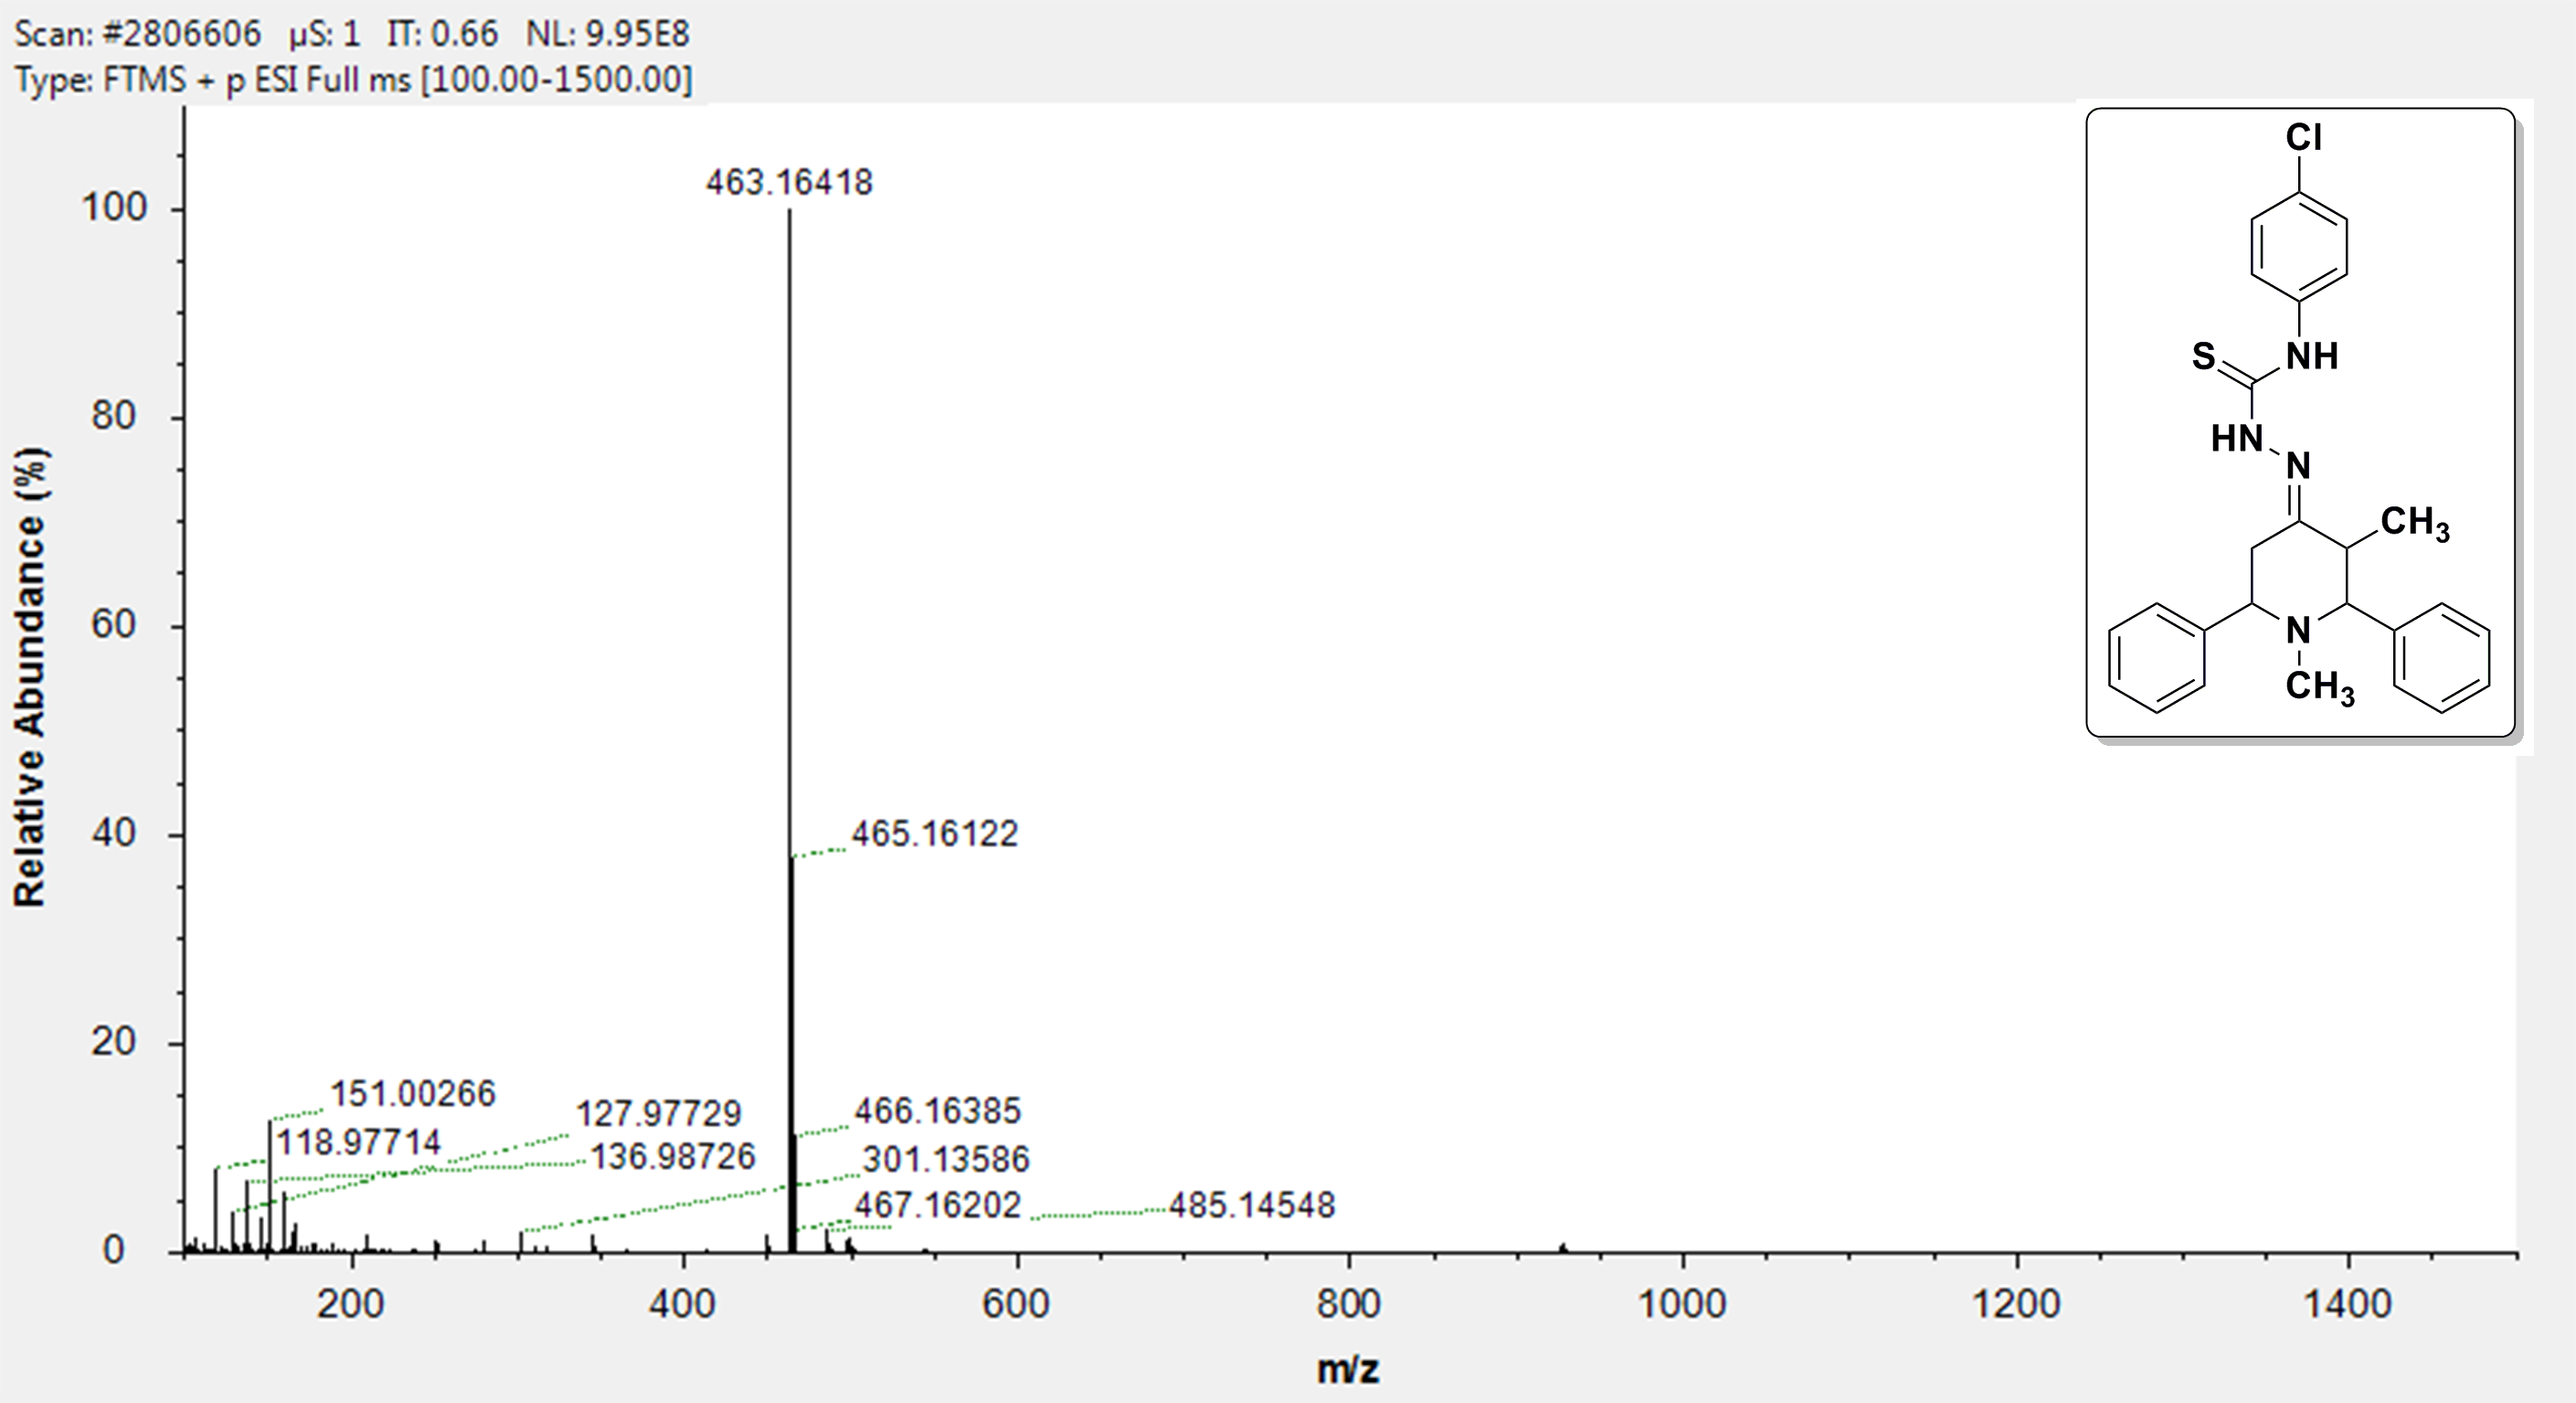


**Figure S 28:** Mass spectrum of compound **7**


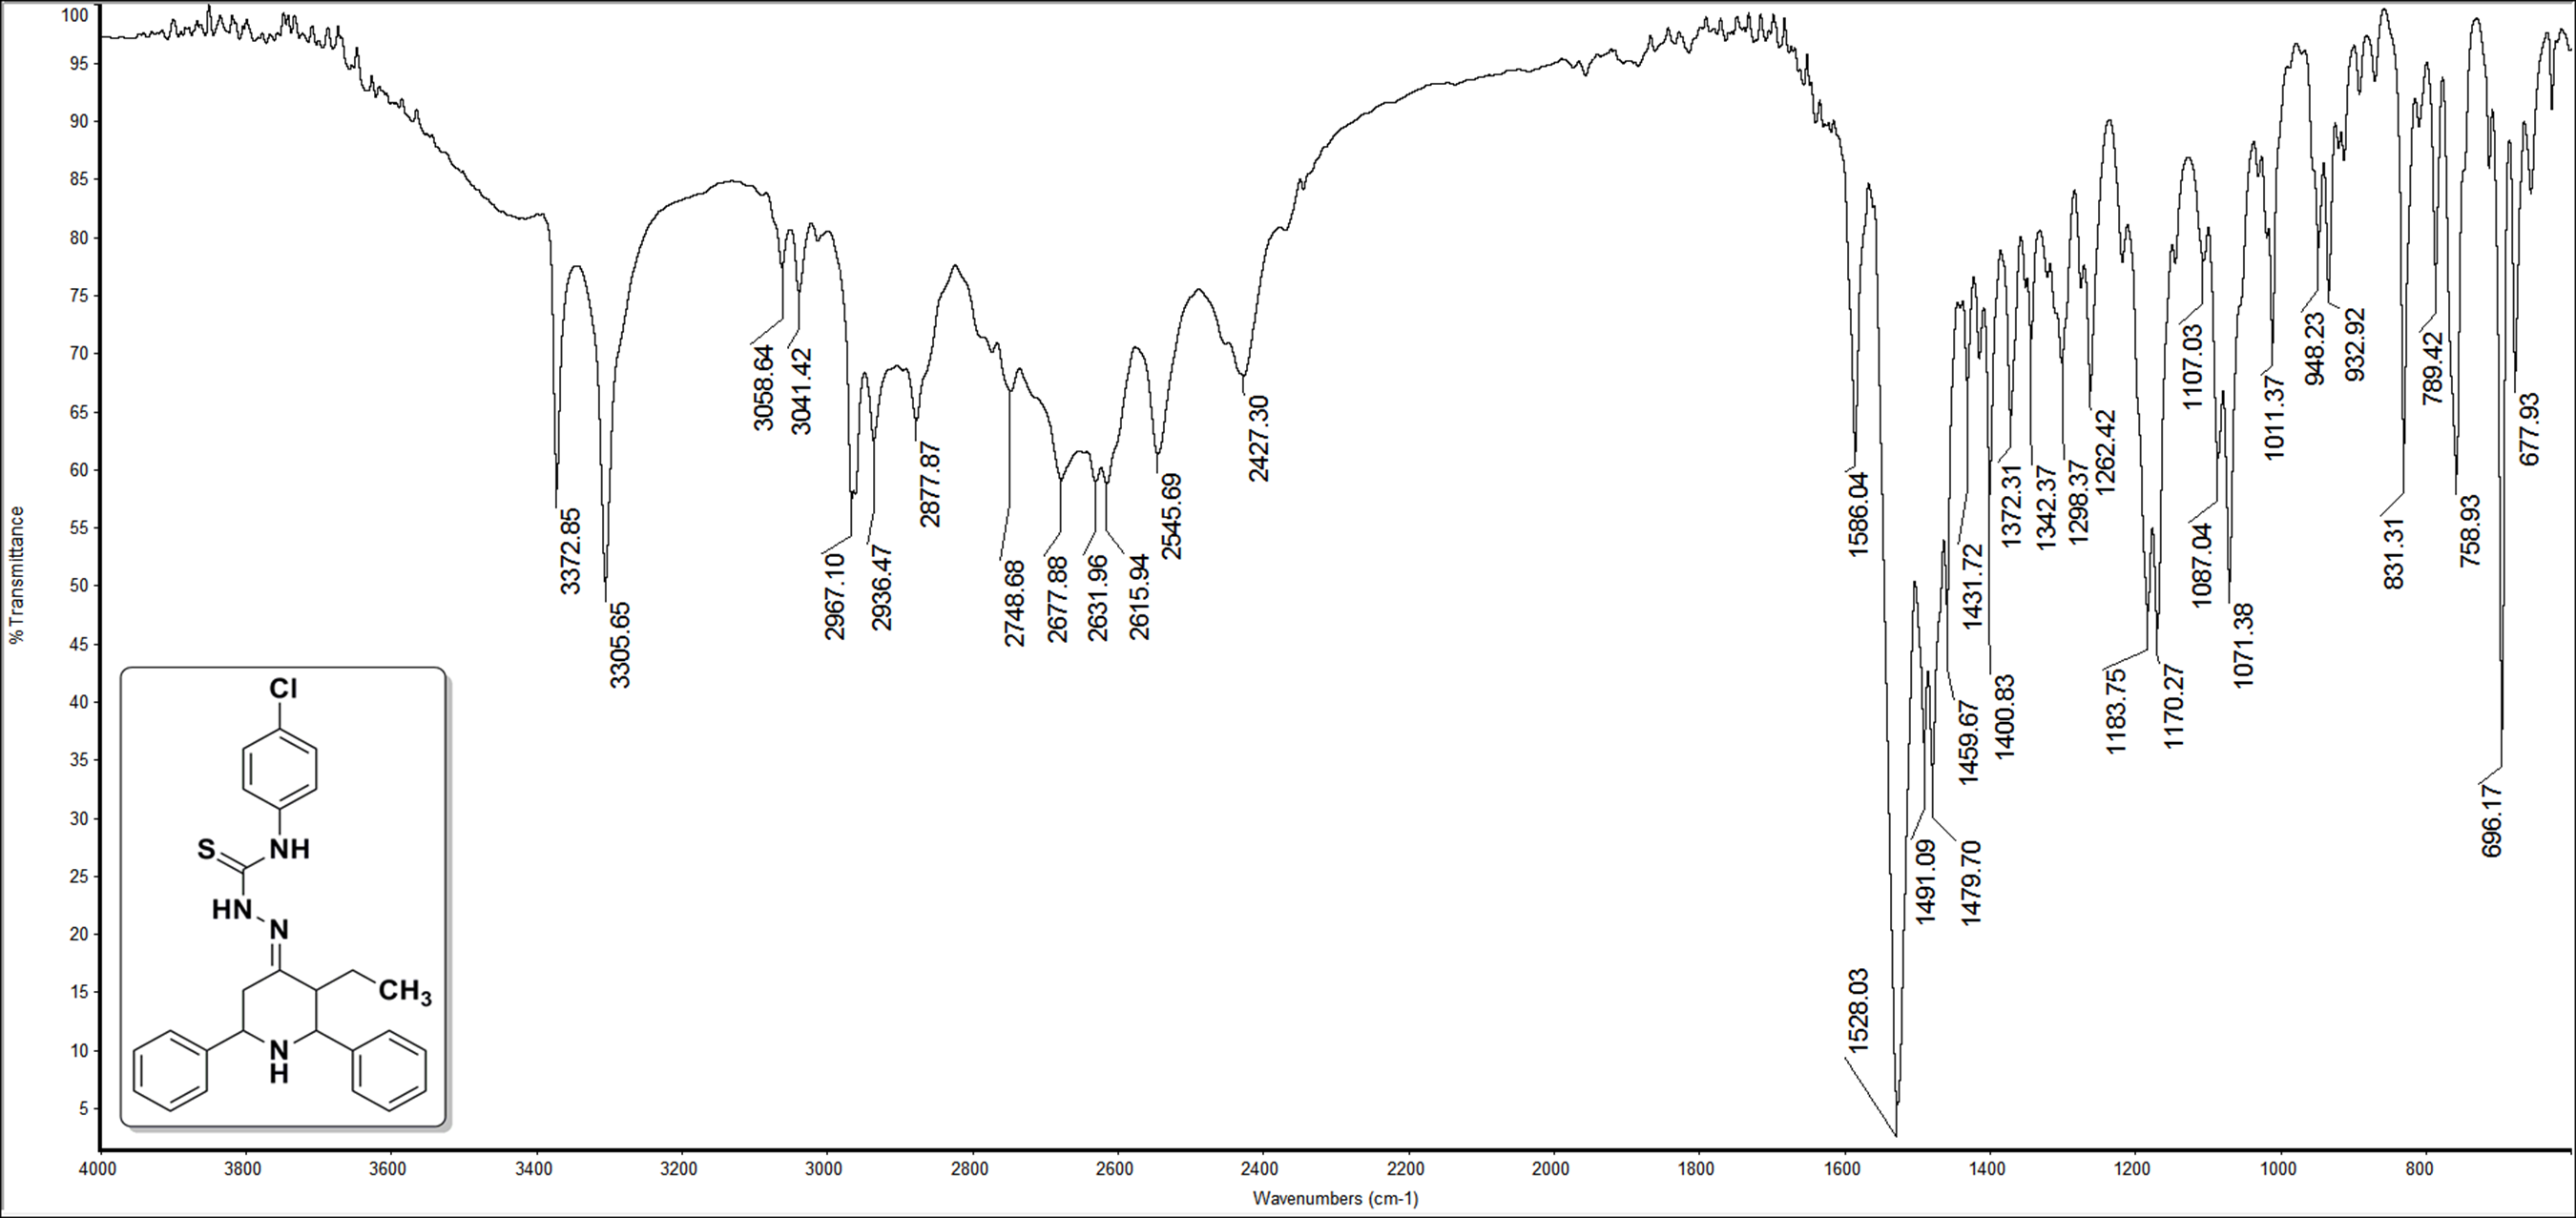


**Figure S 29:** FTIR spectrum of compound **8**


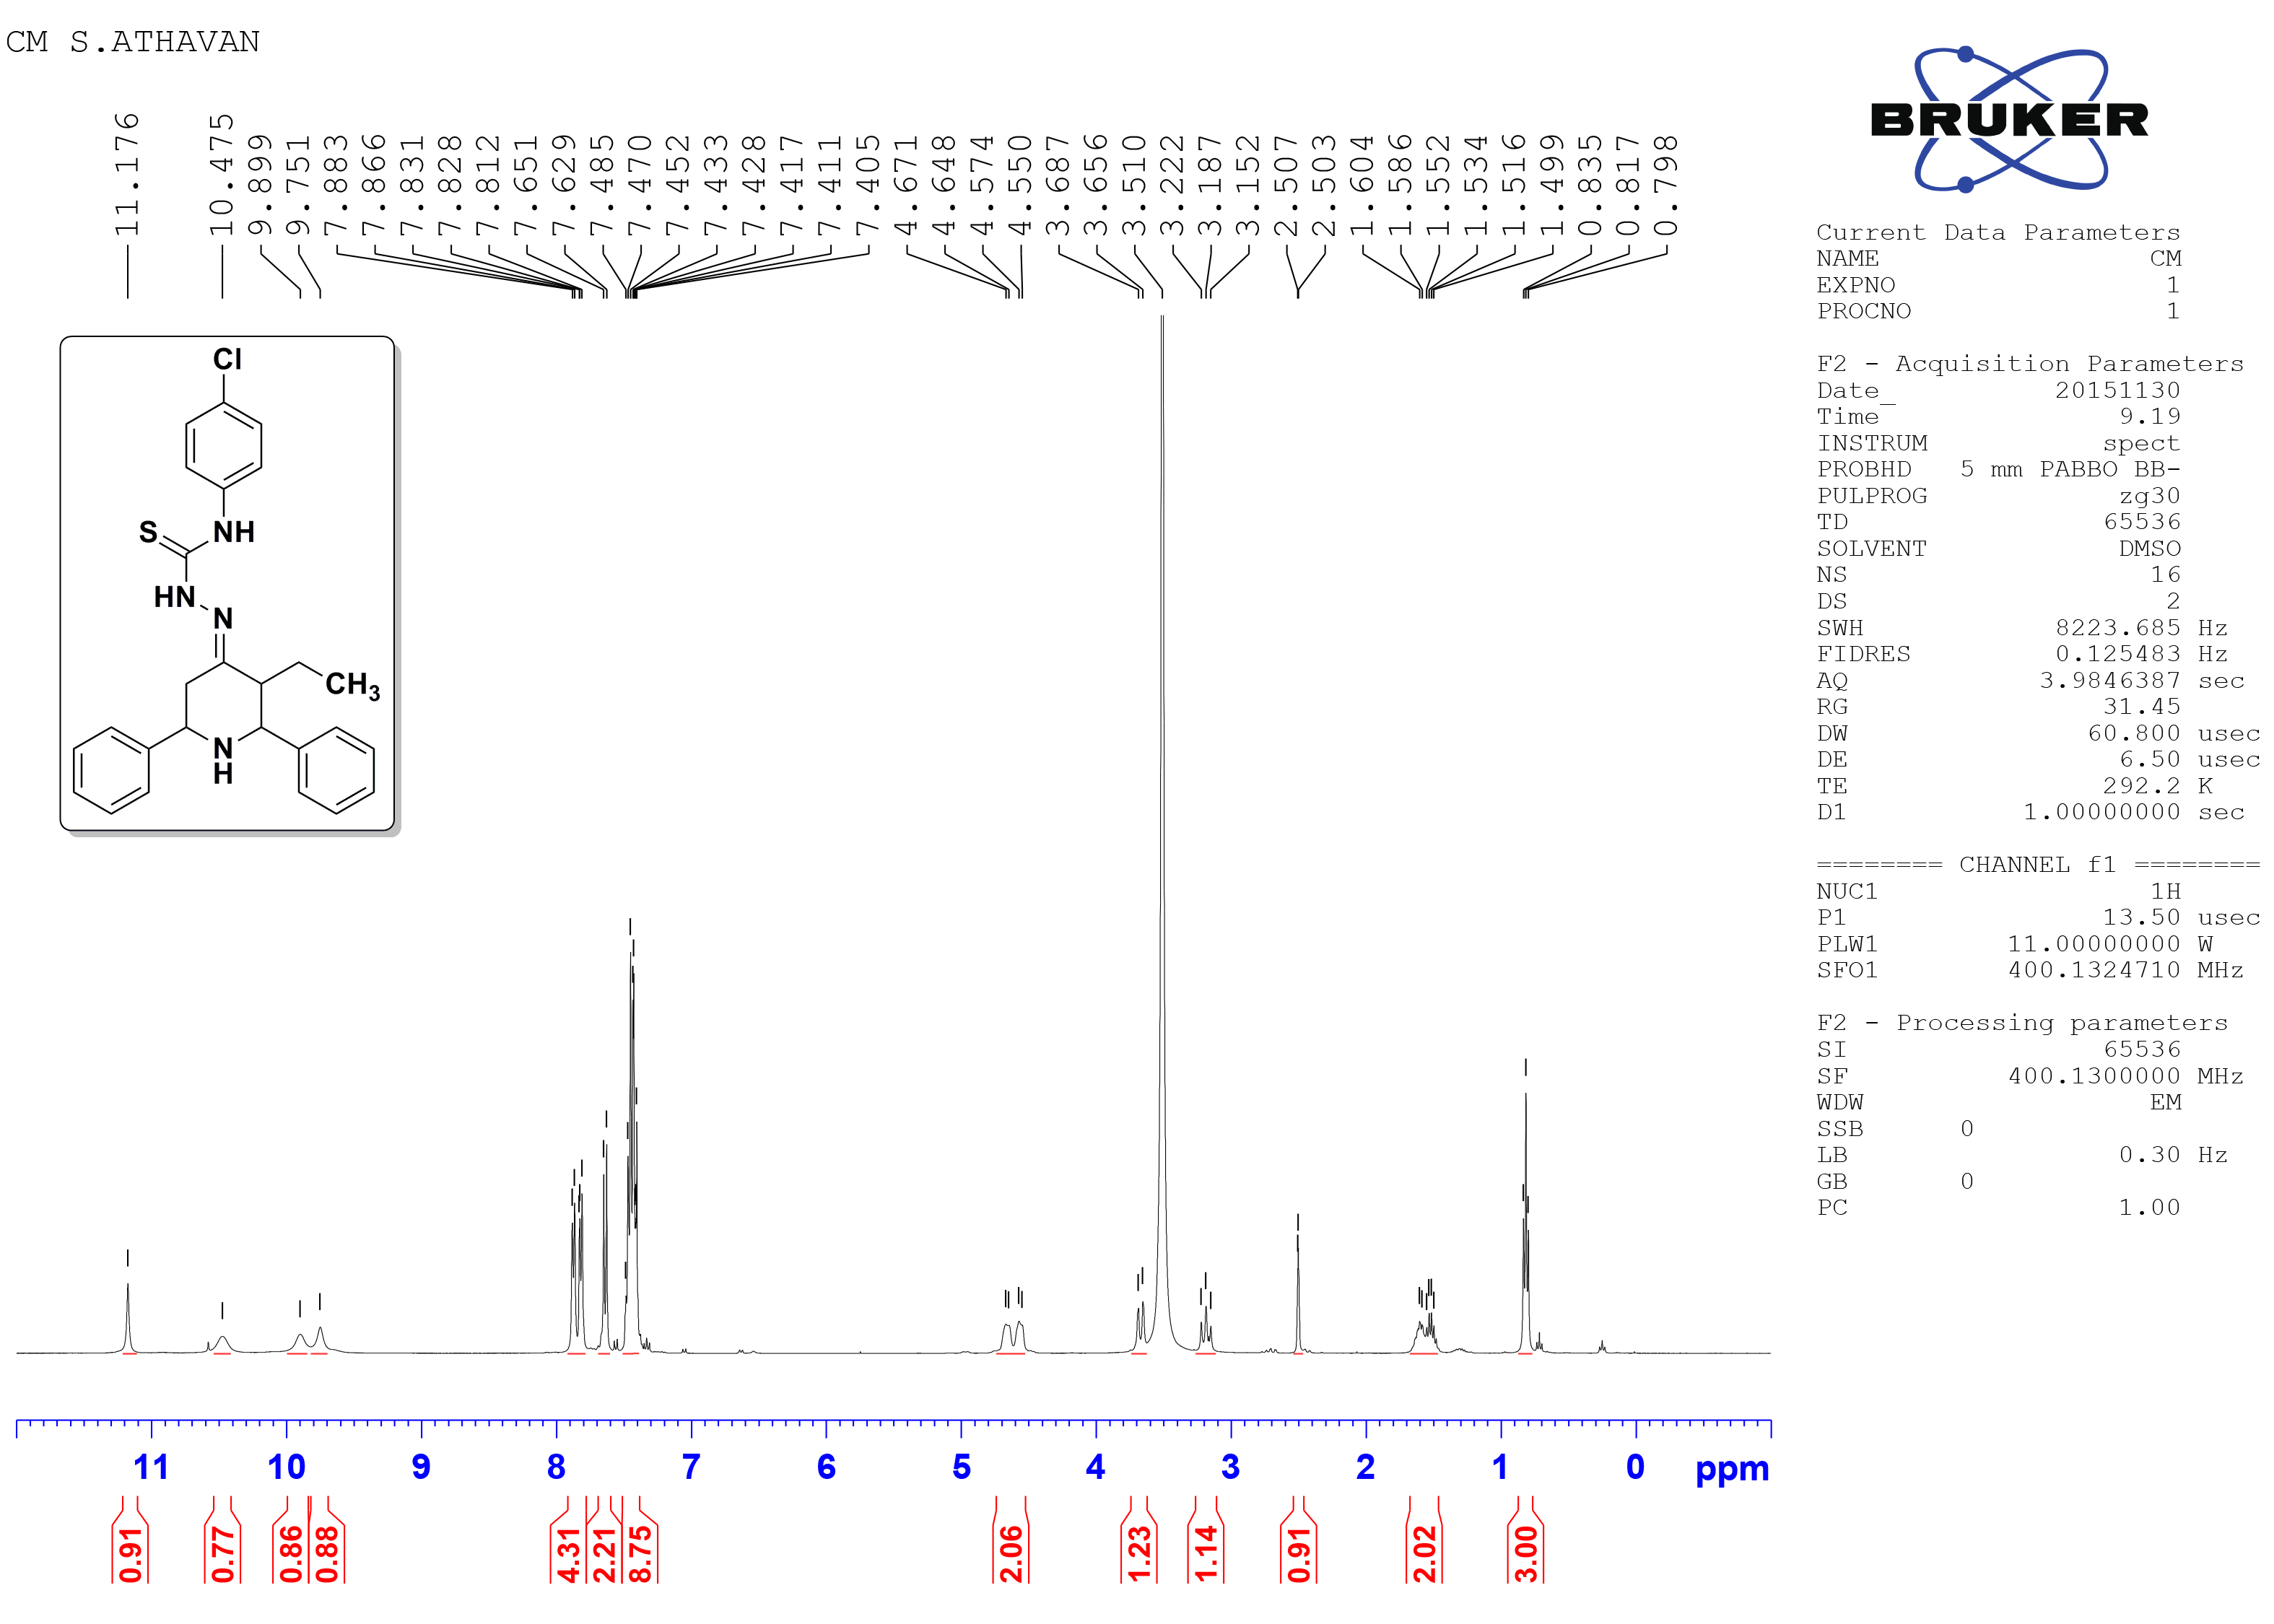


**Figure S 30:** 1H NMR of compound **8**


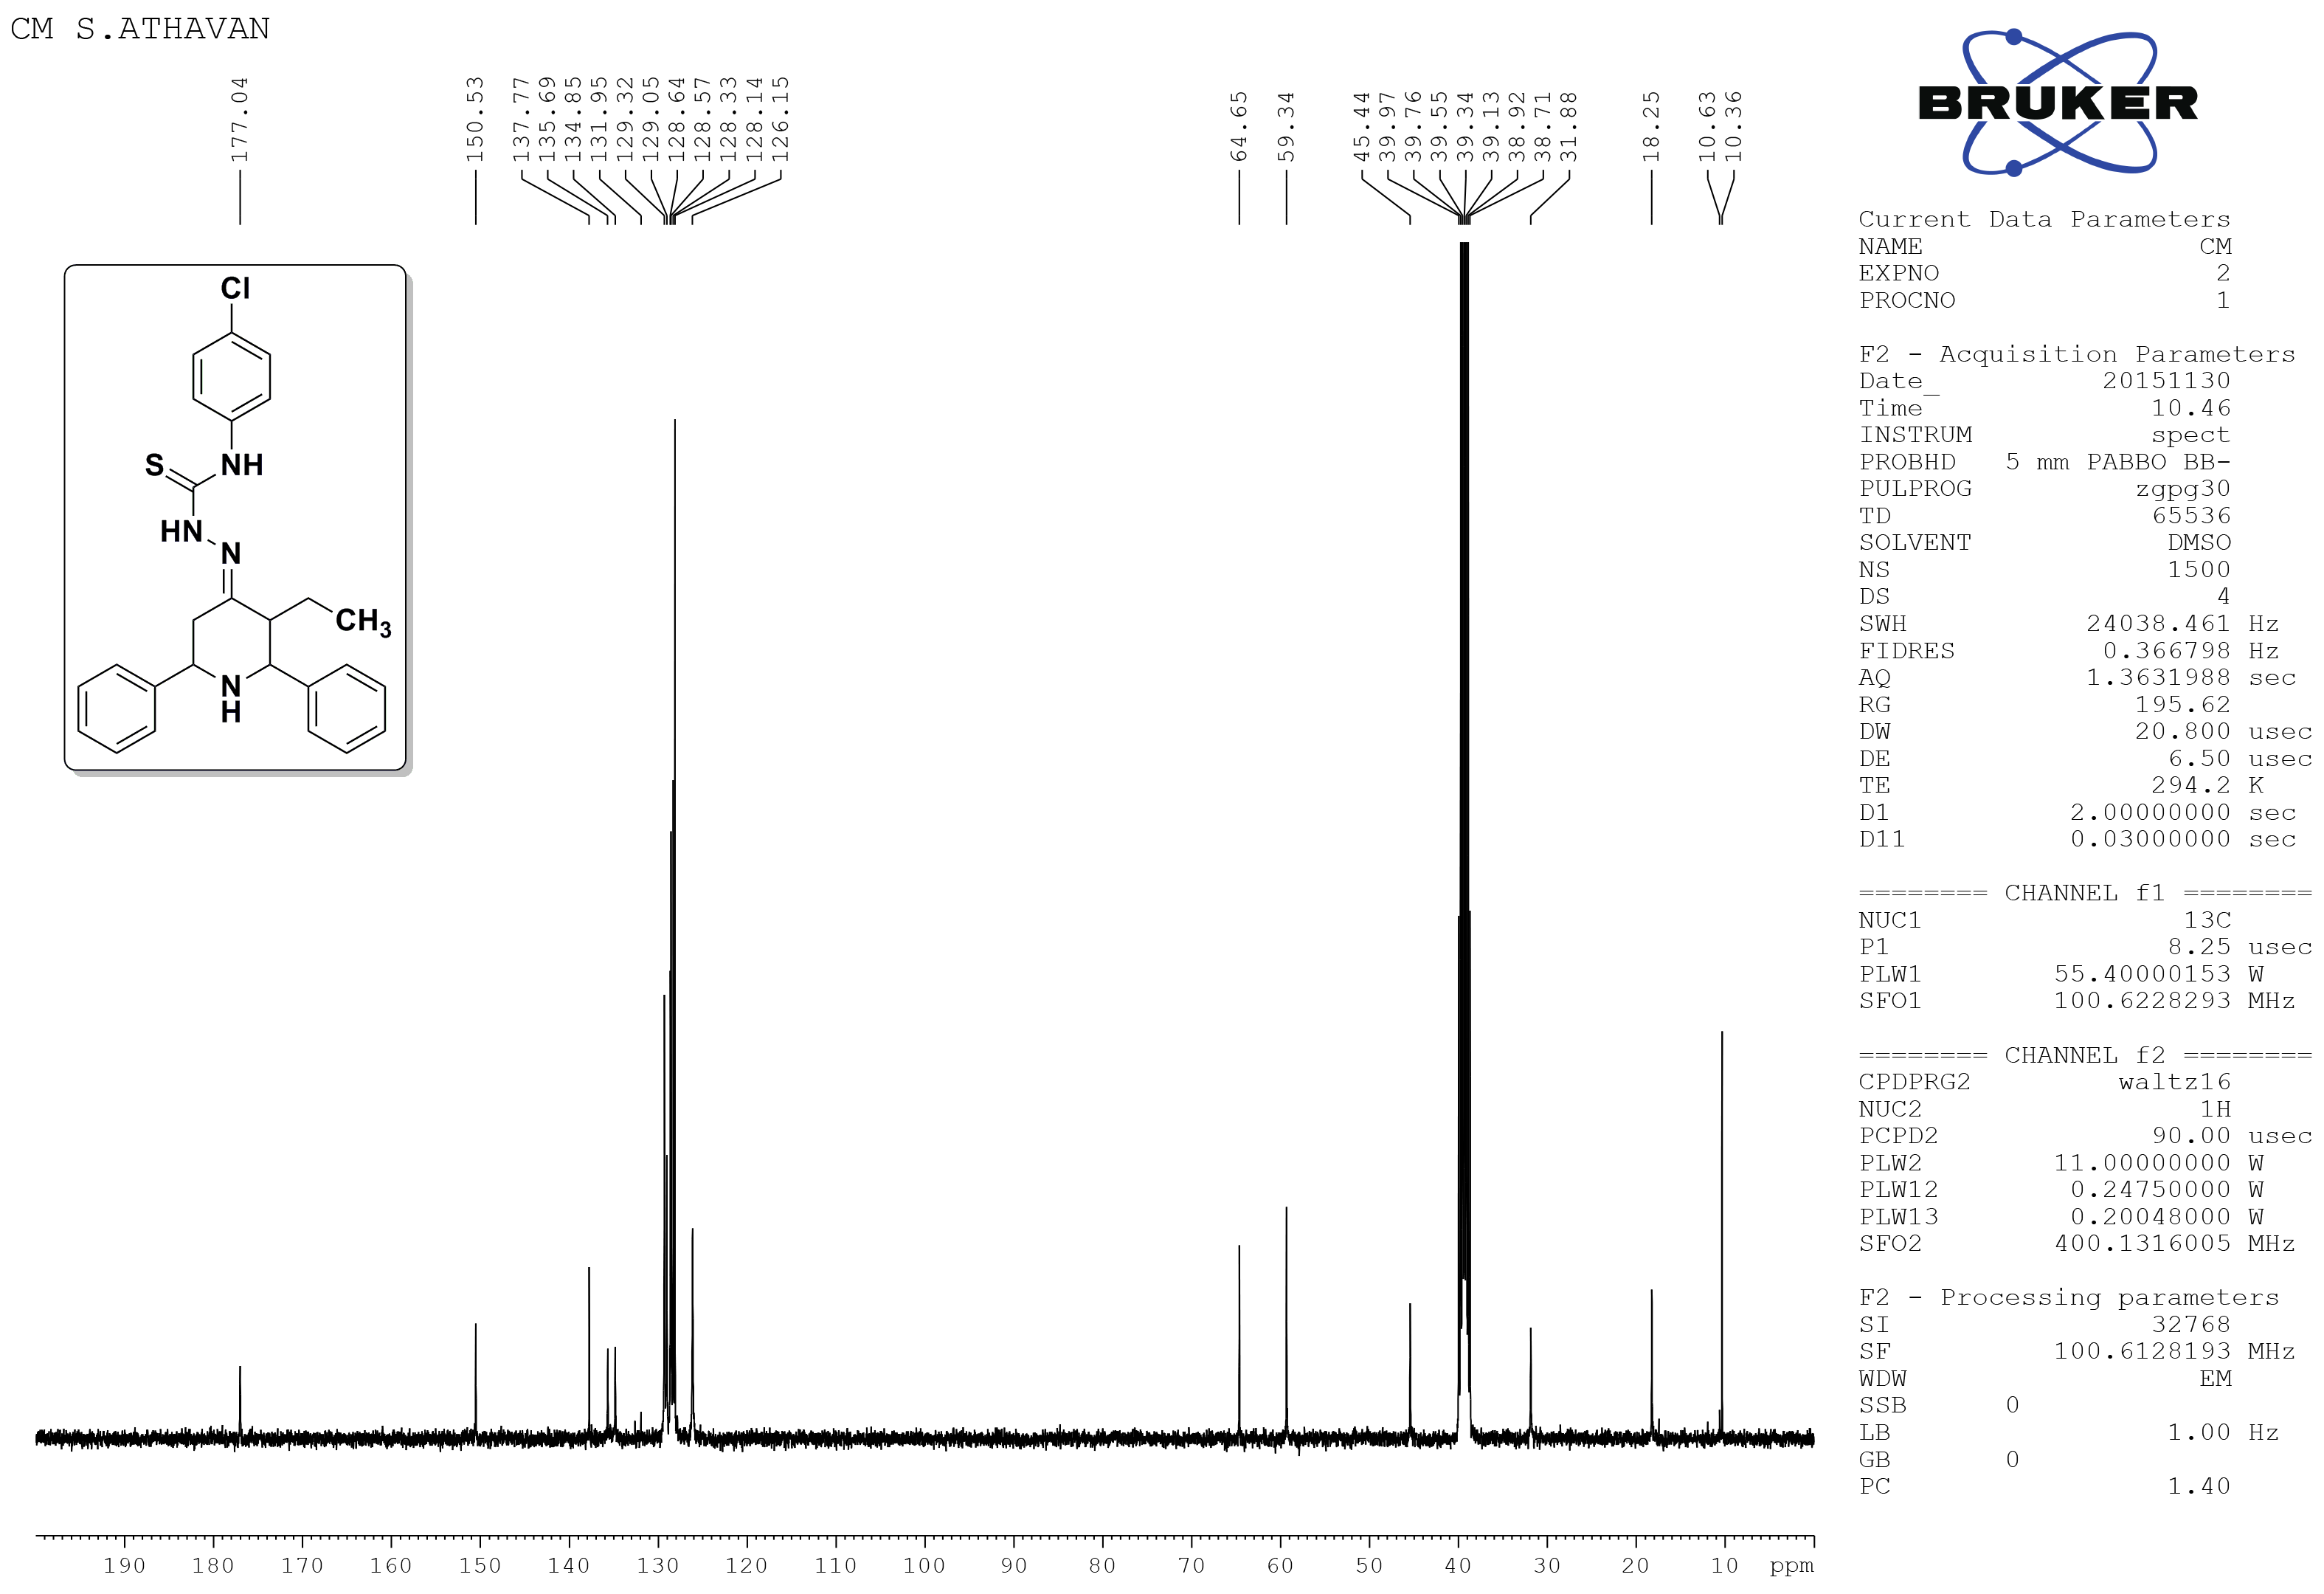


**Figure S 31:** 13C NMR of compound **8**


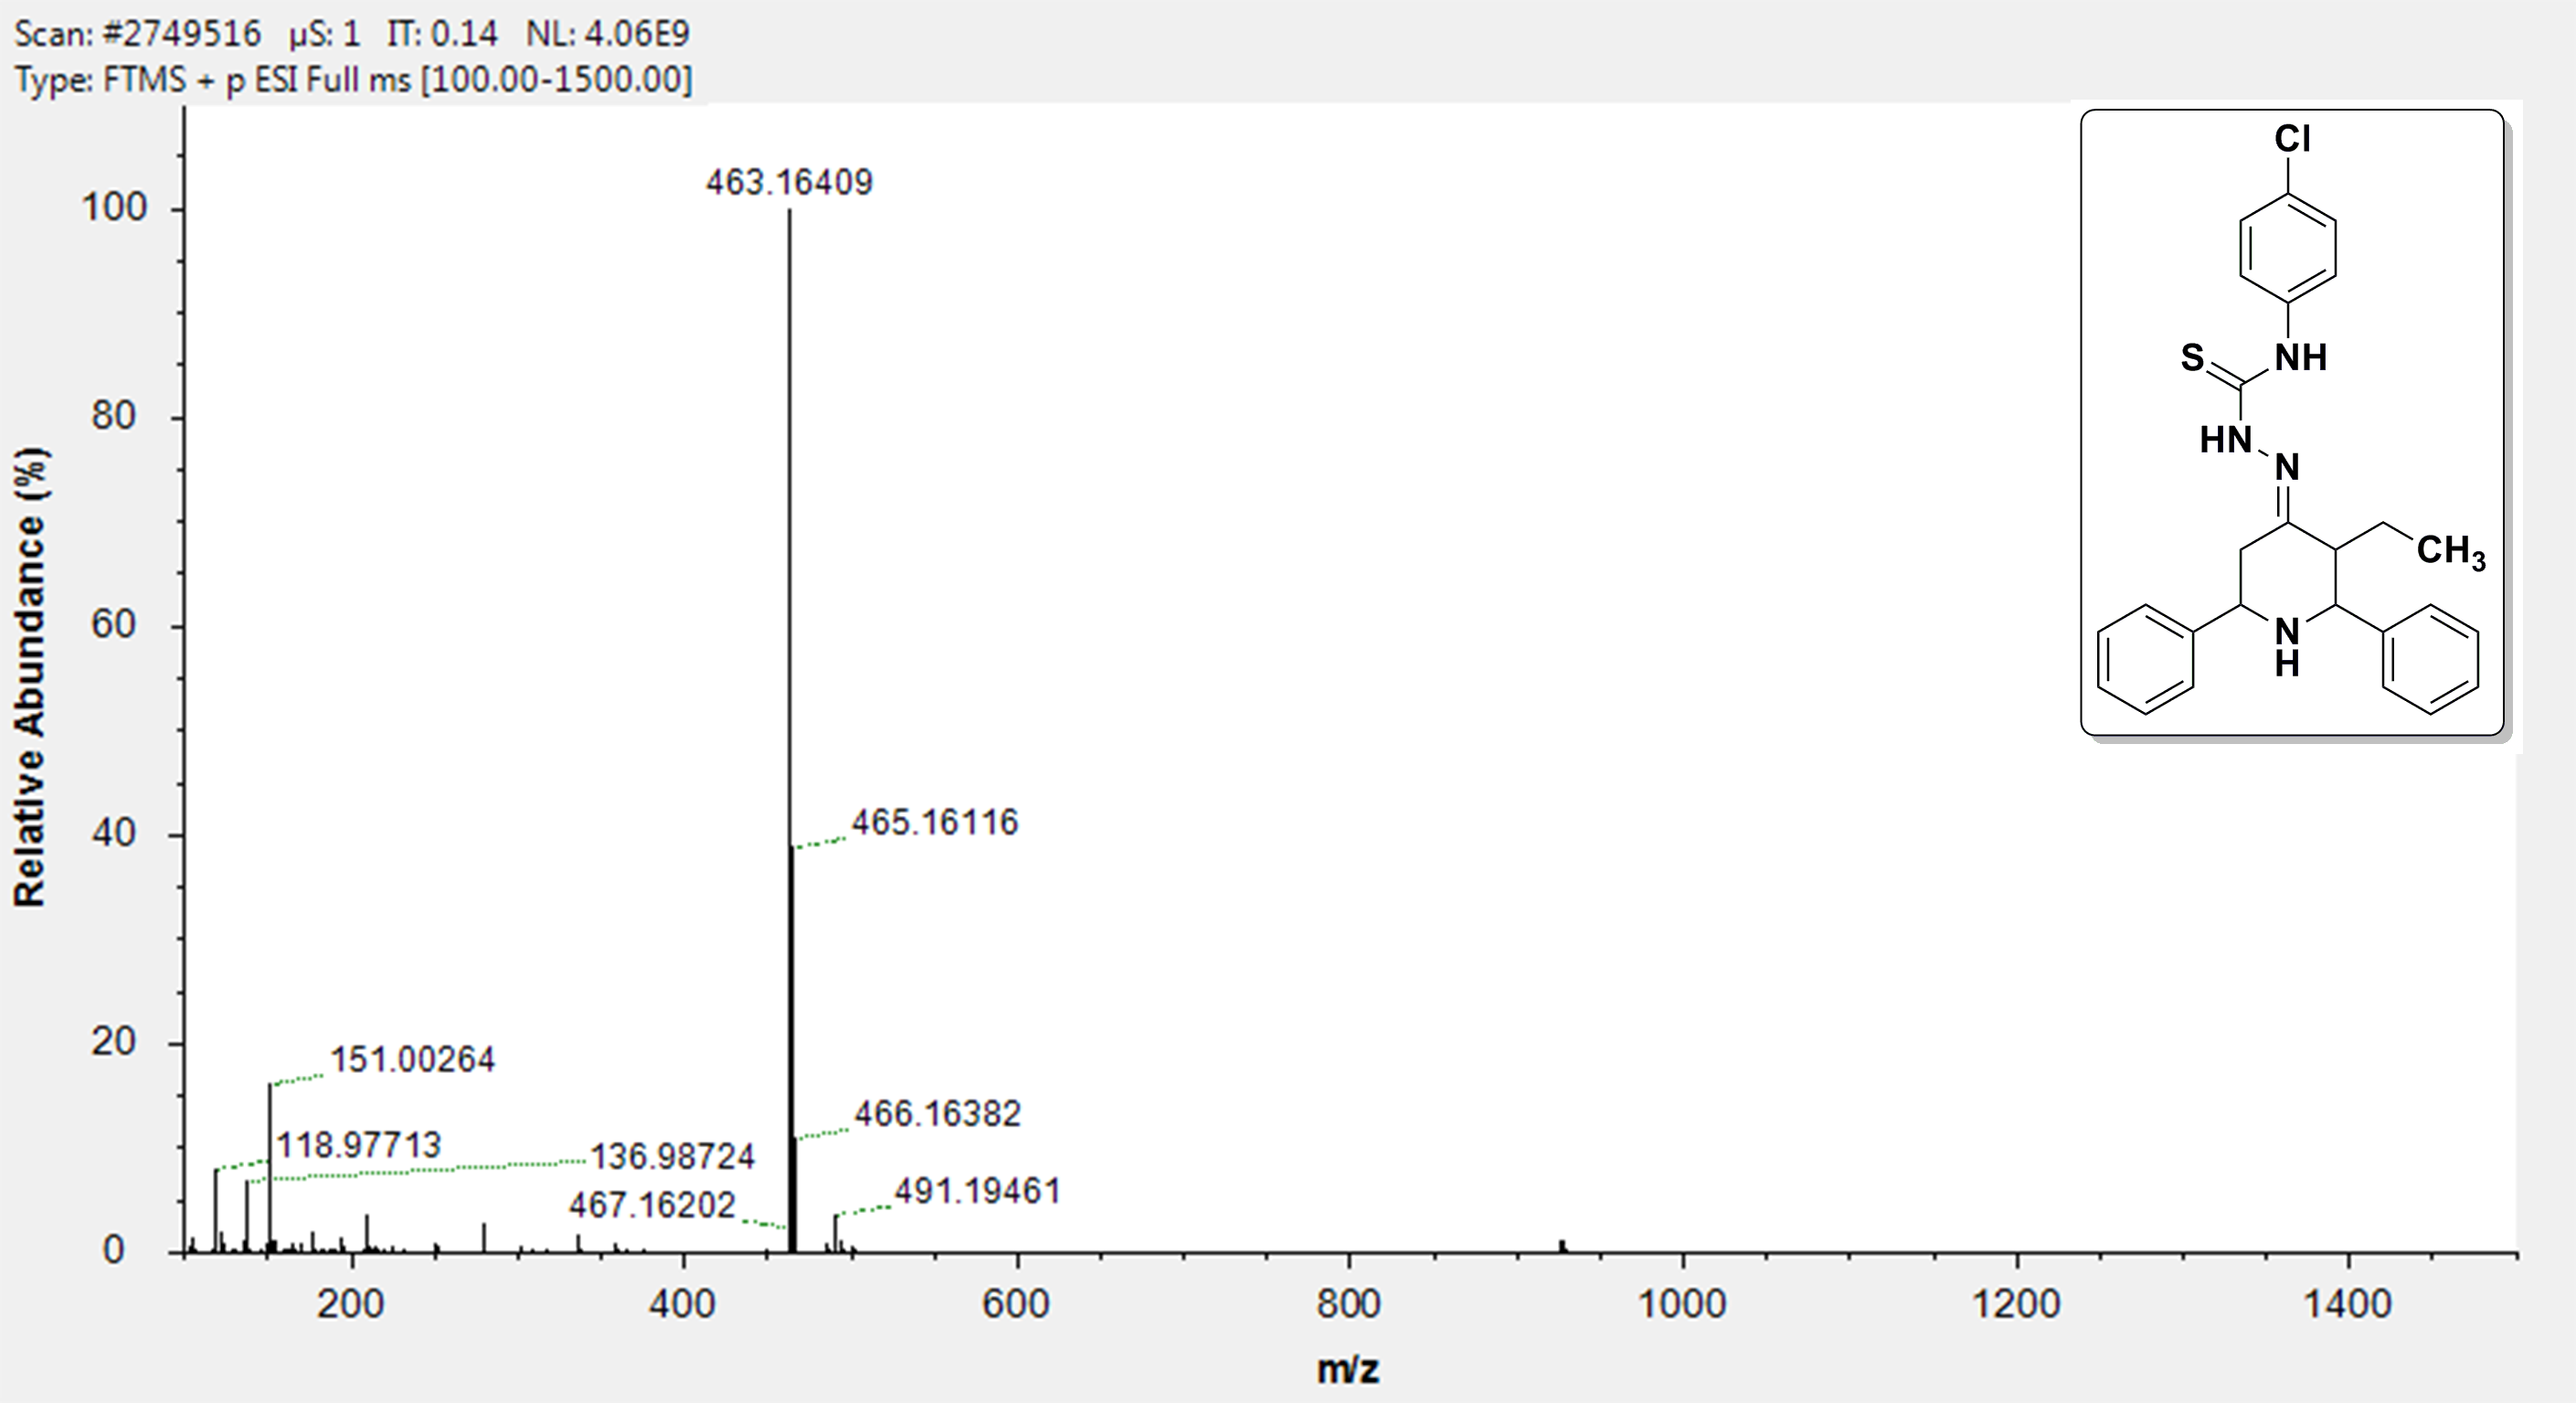


**Figure S 32:** Mass spectrum of compound **8**


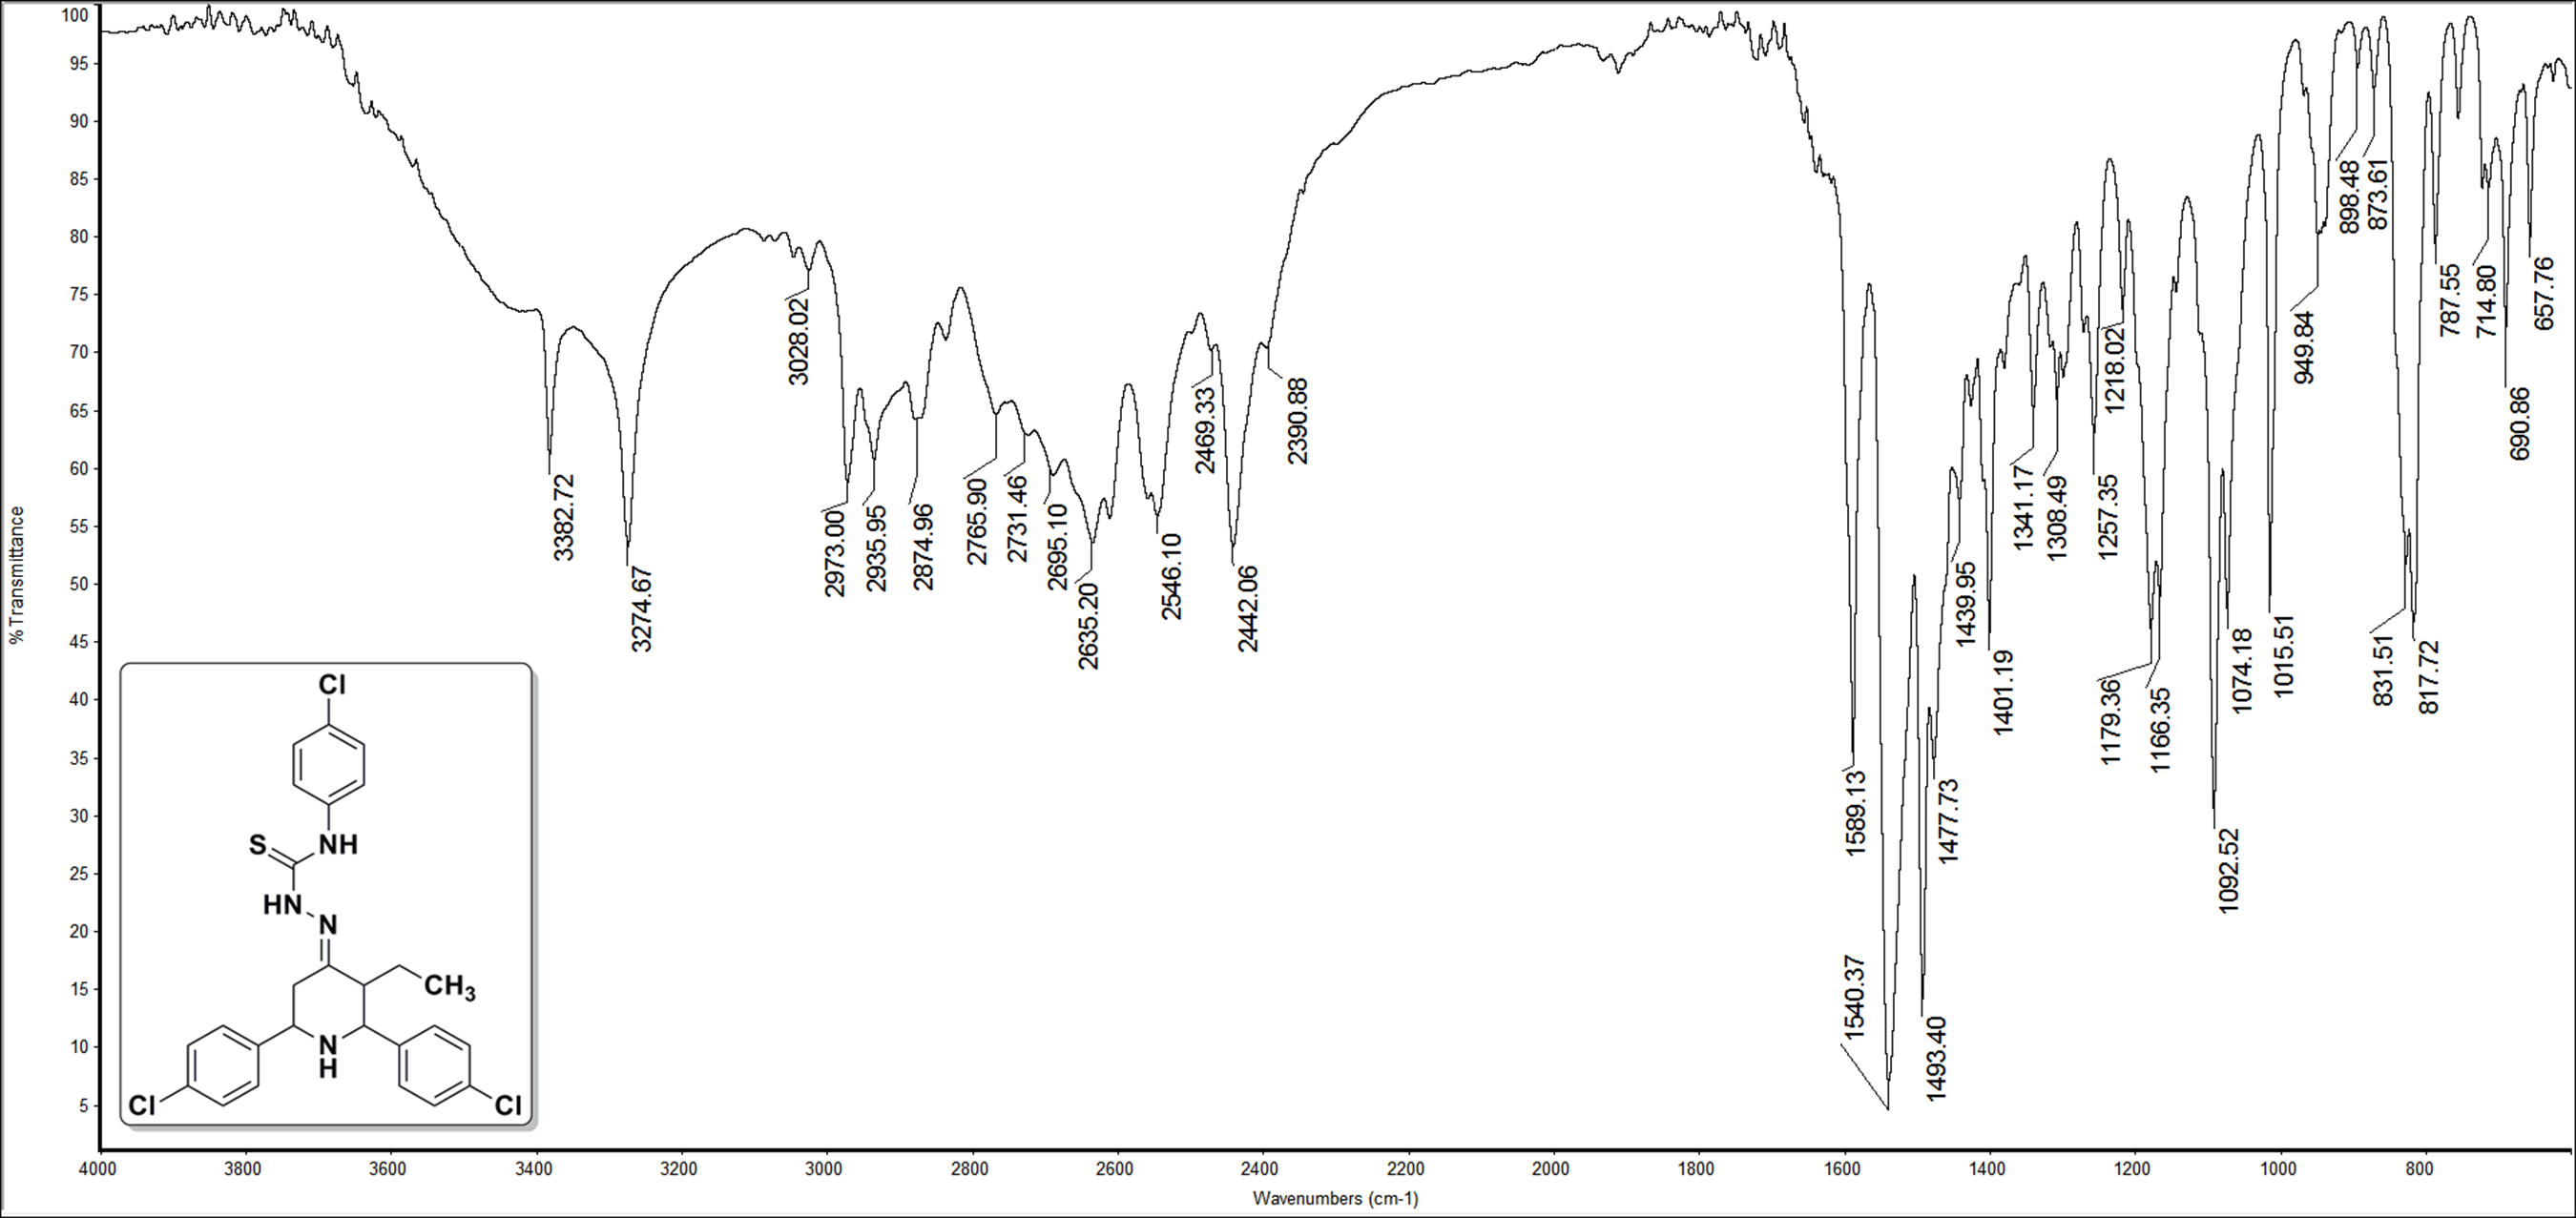


**Figure S 33:** FTIR spectrum of compound **9**


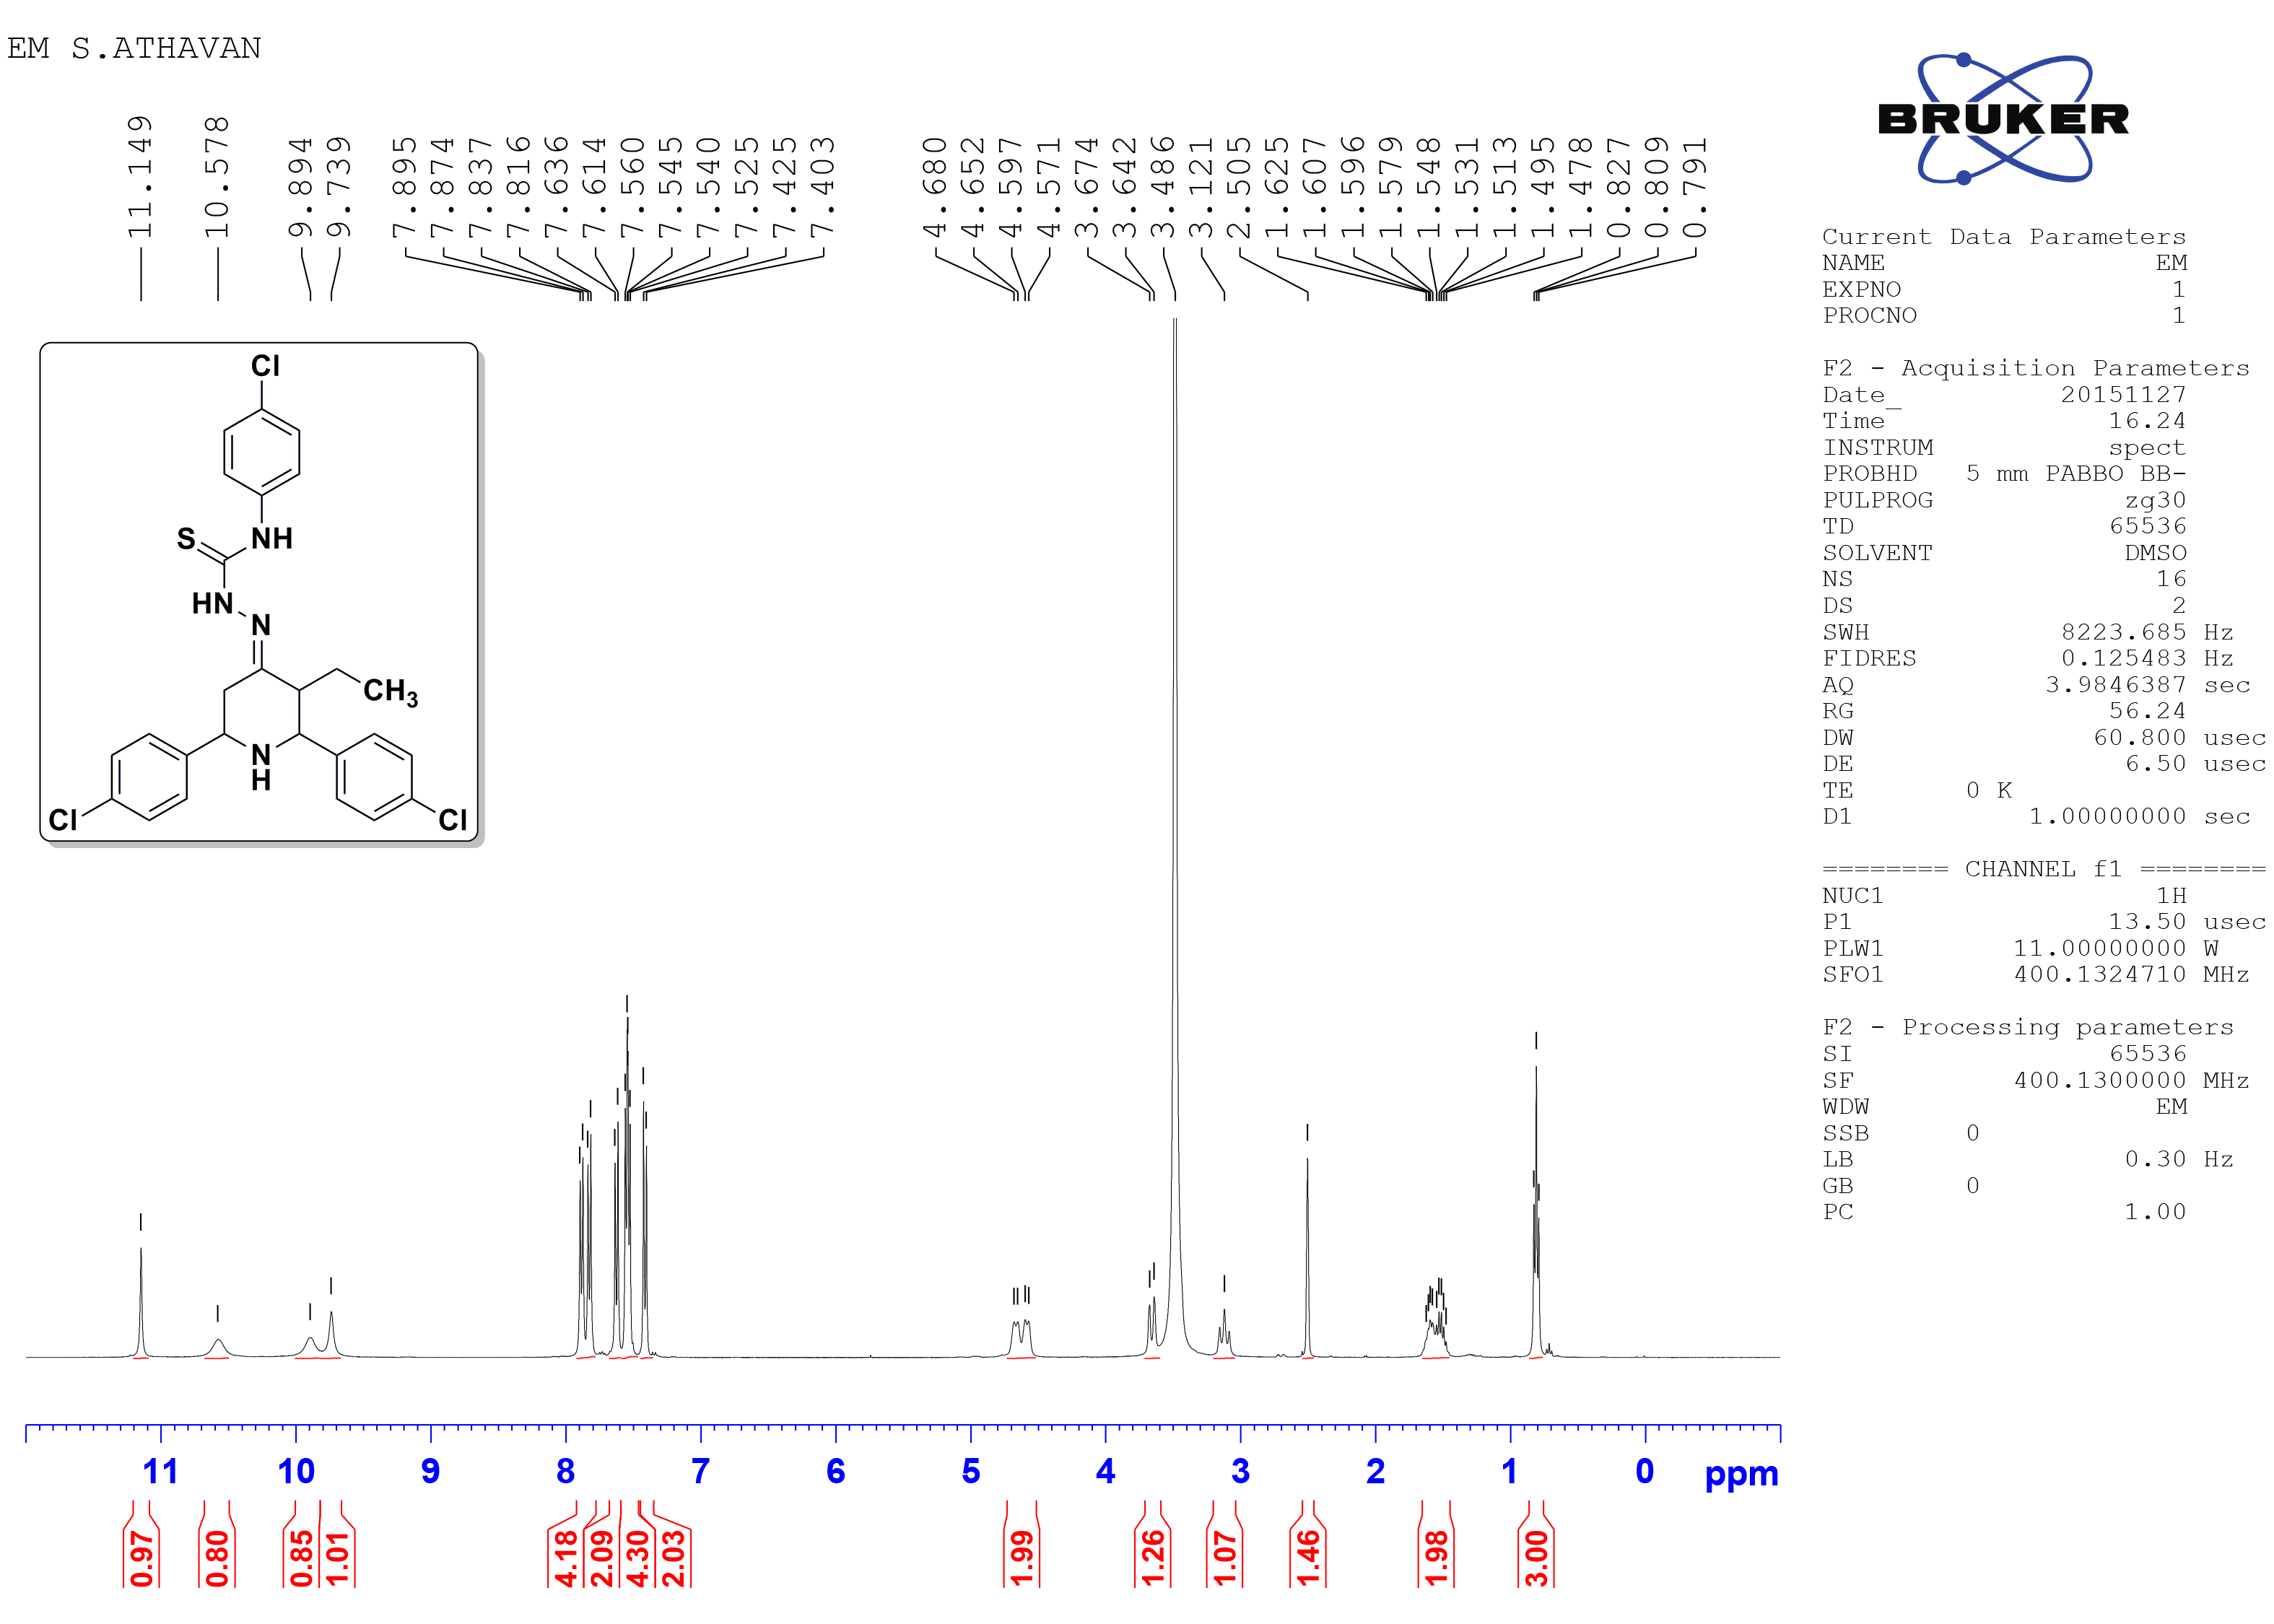


**Figure S 34:** 1H NMR of compound **9**


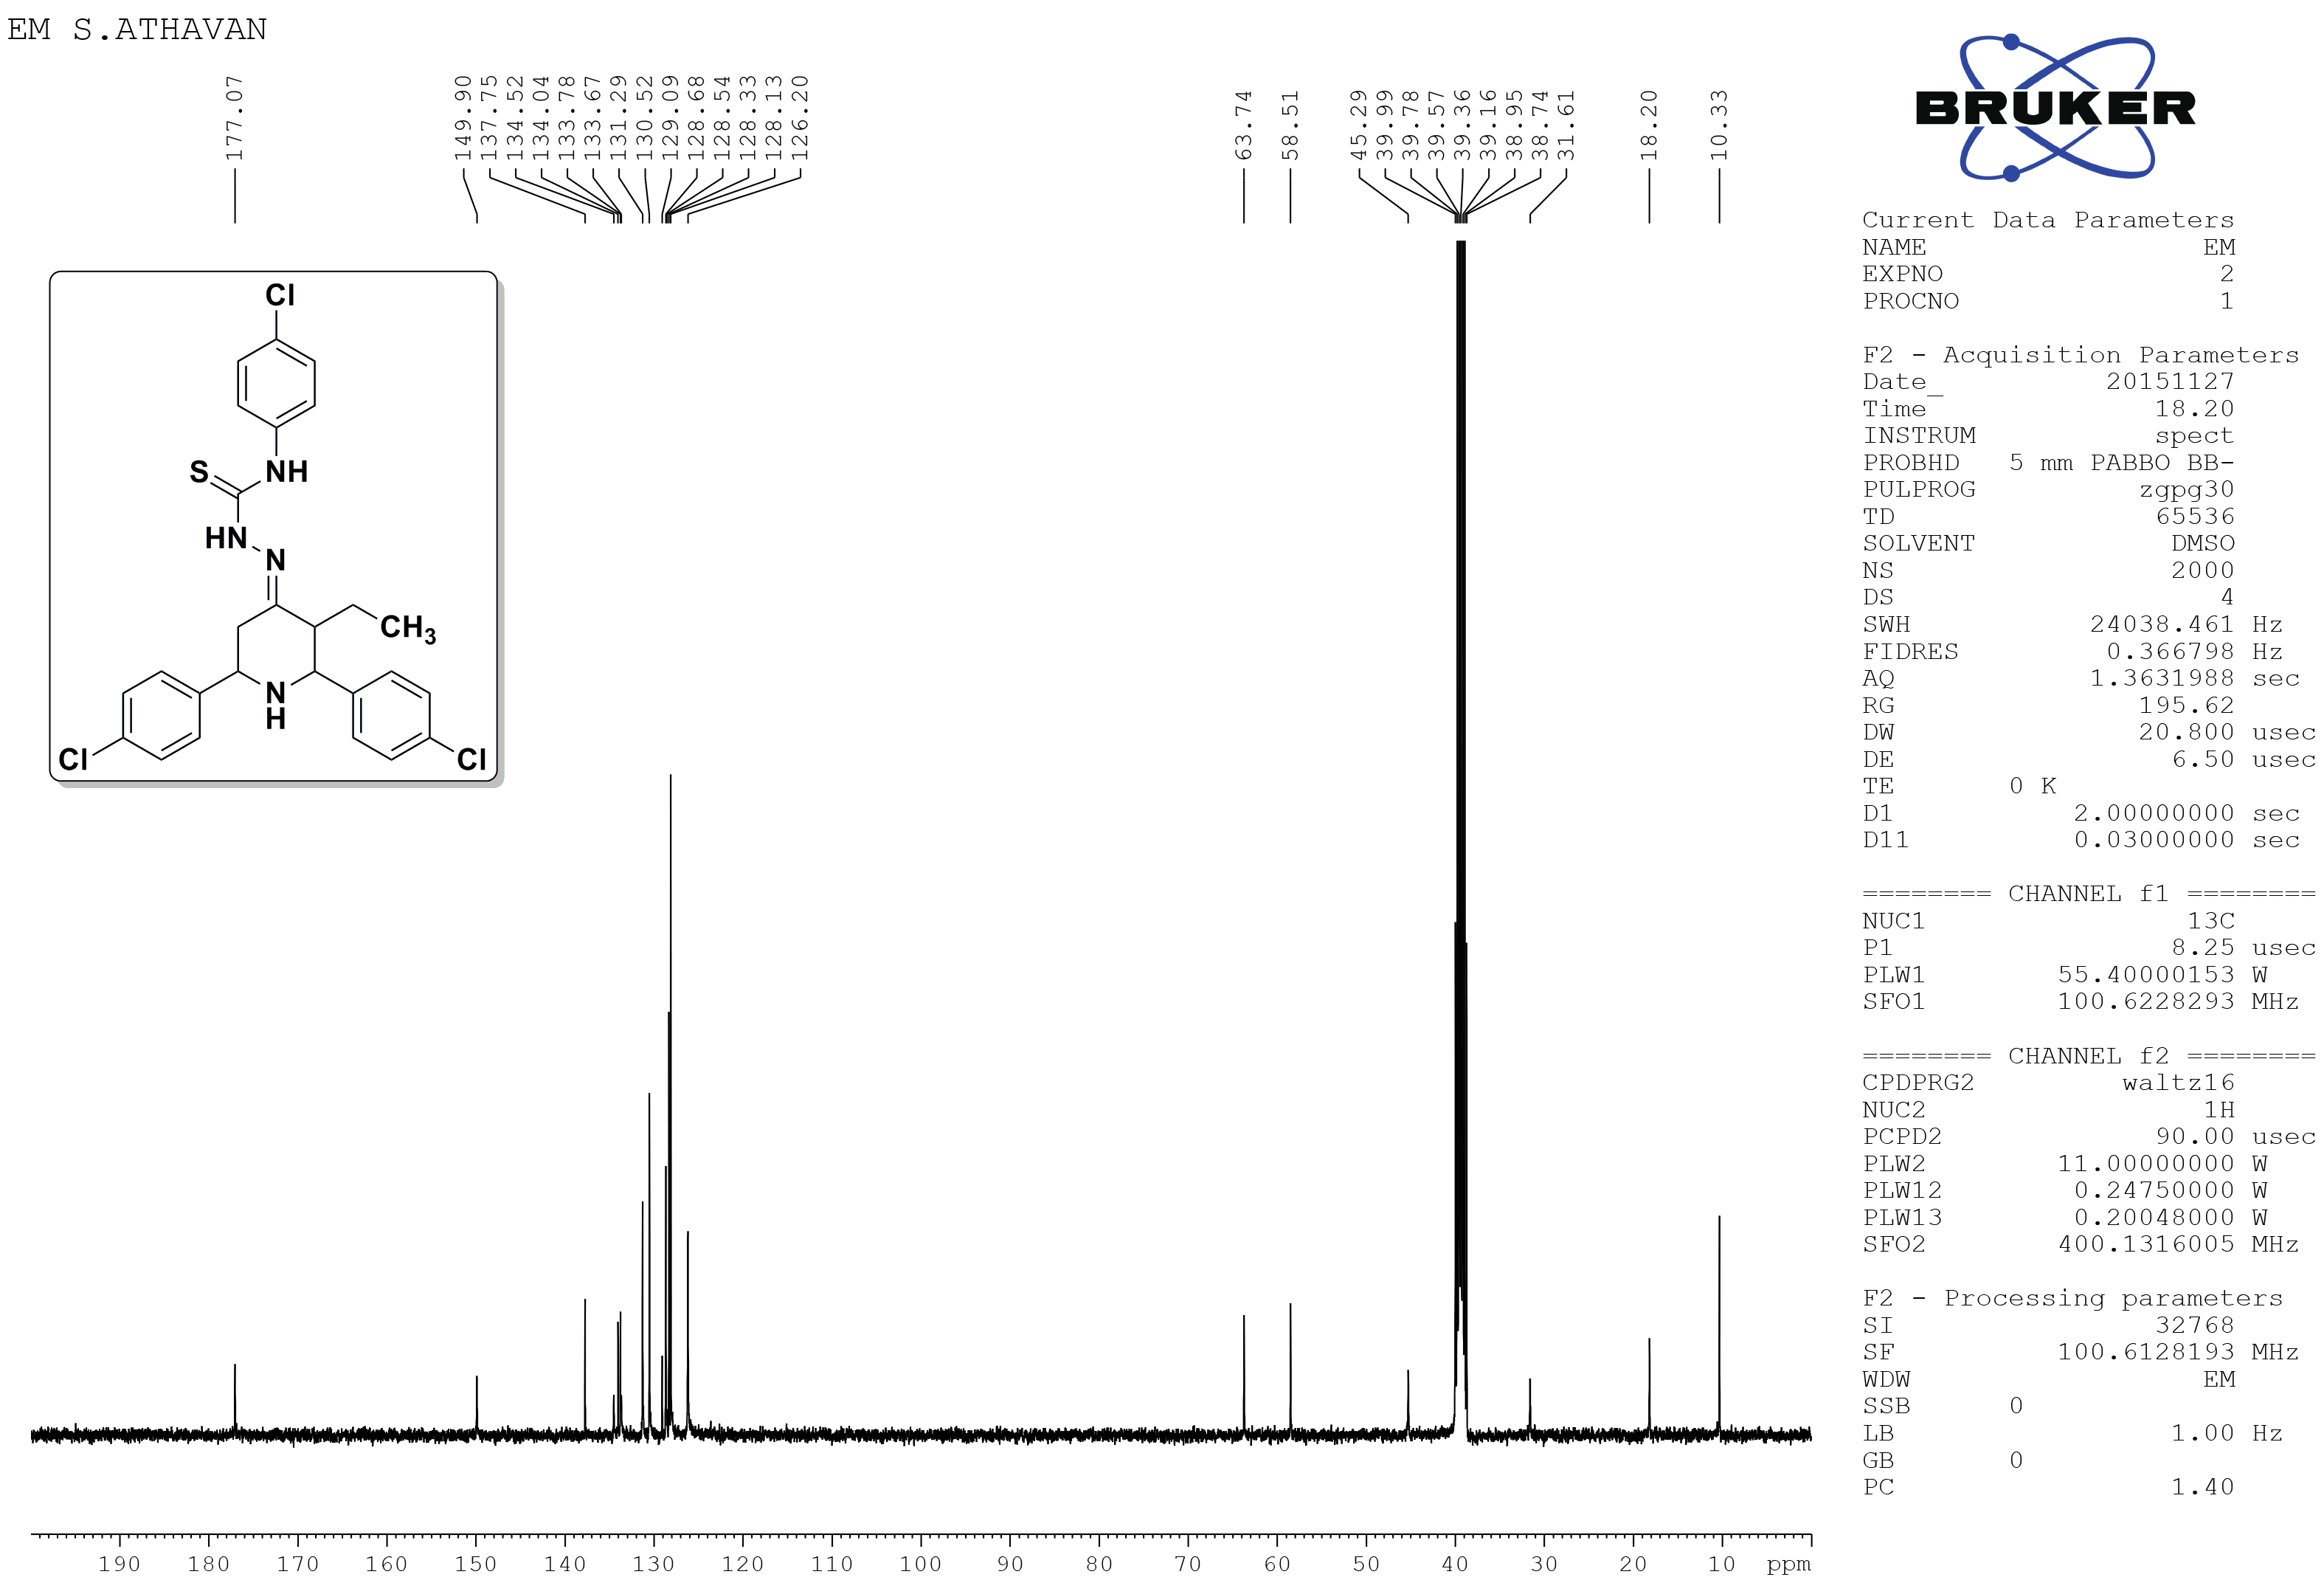


**Figure S 35:** 13C NMR of compound **9**


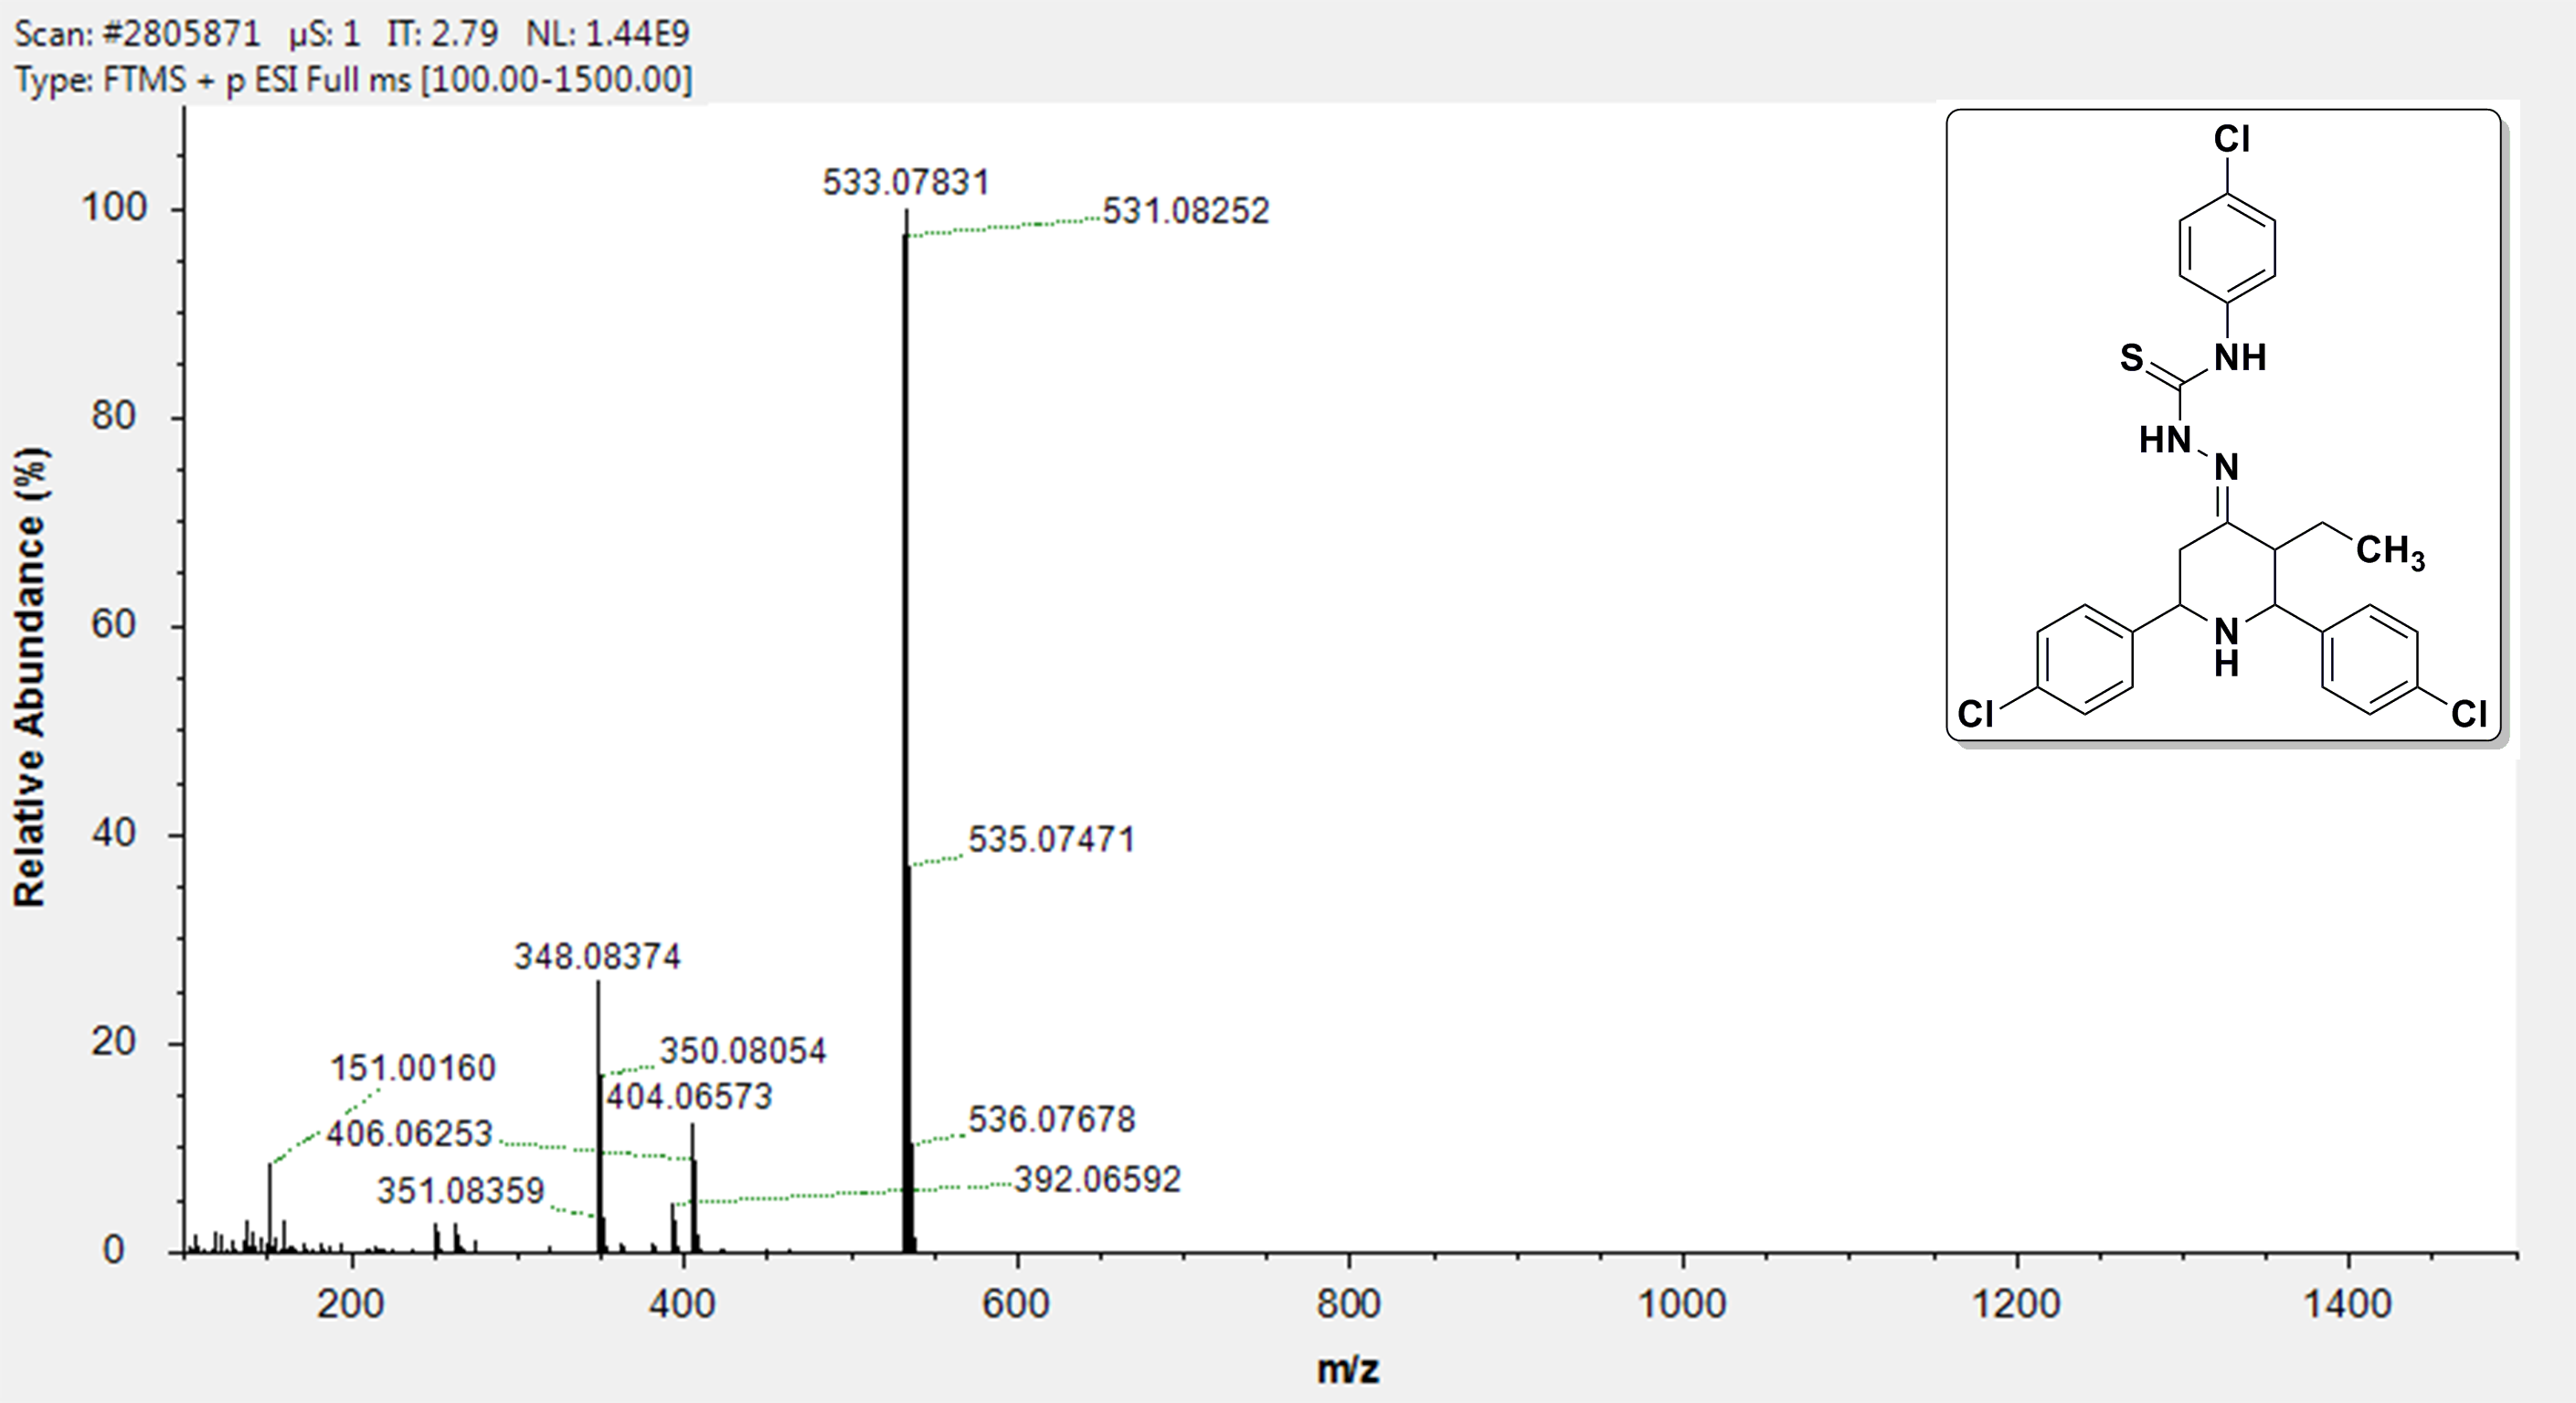


**Figure S 36:** Mass spectrum of compound **9**


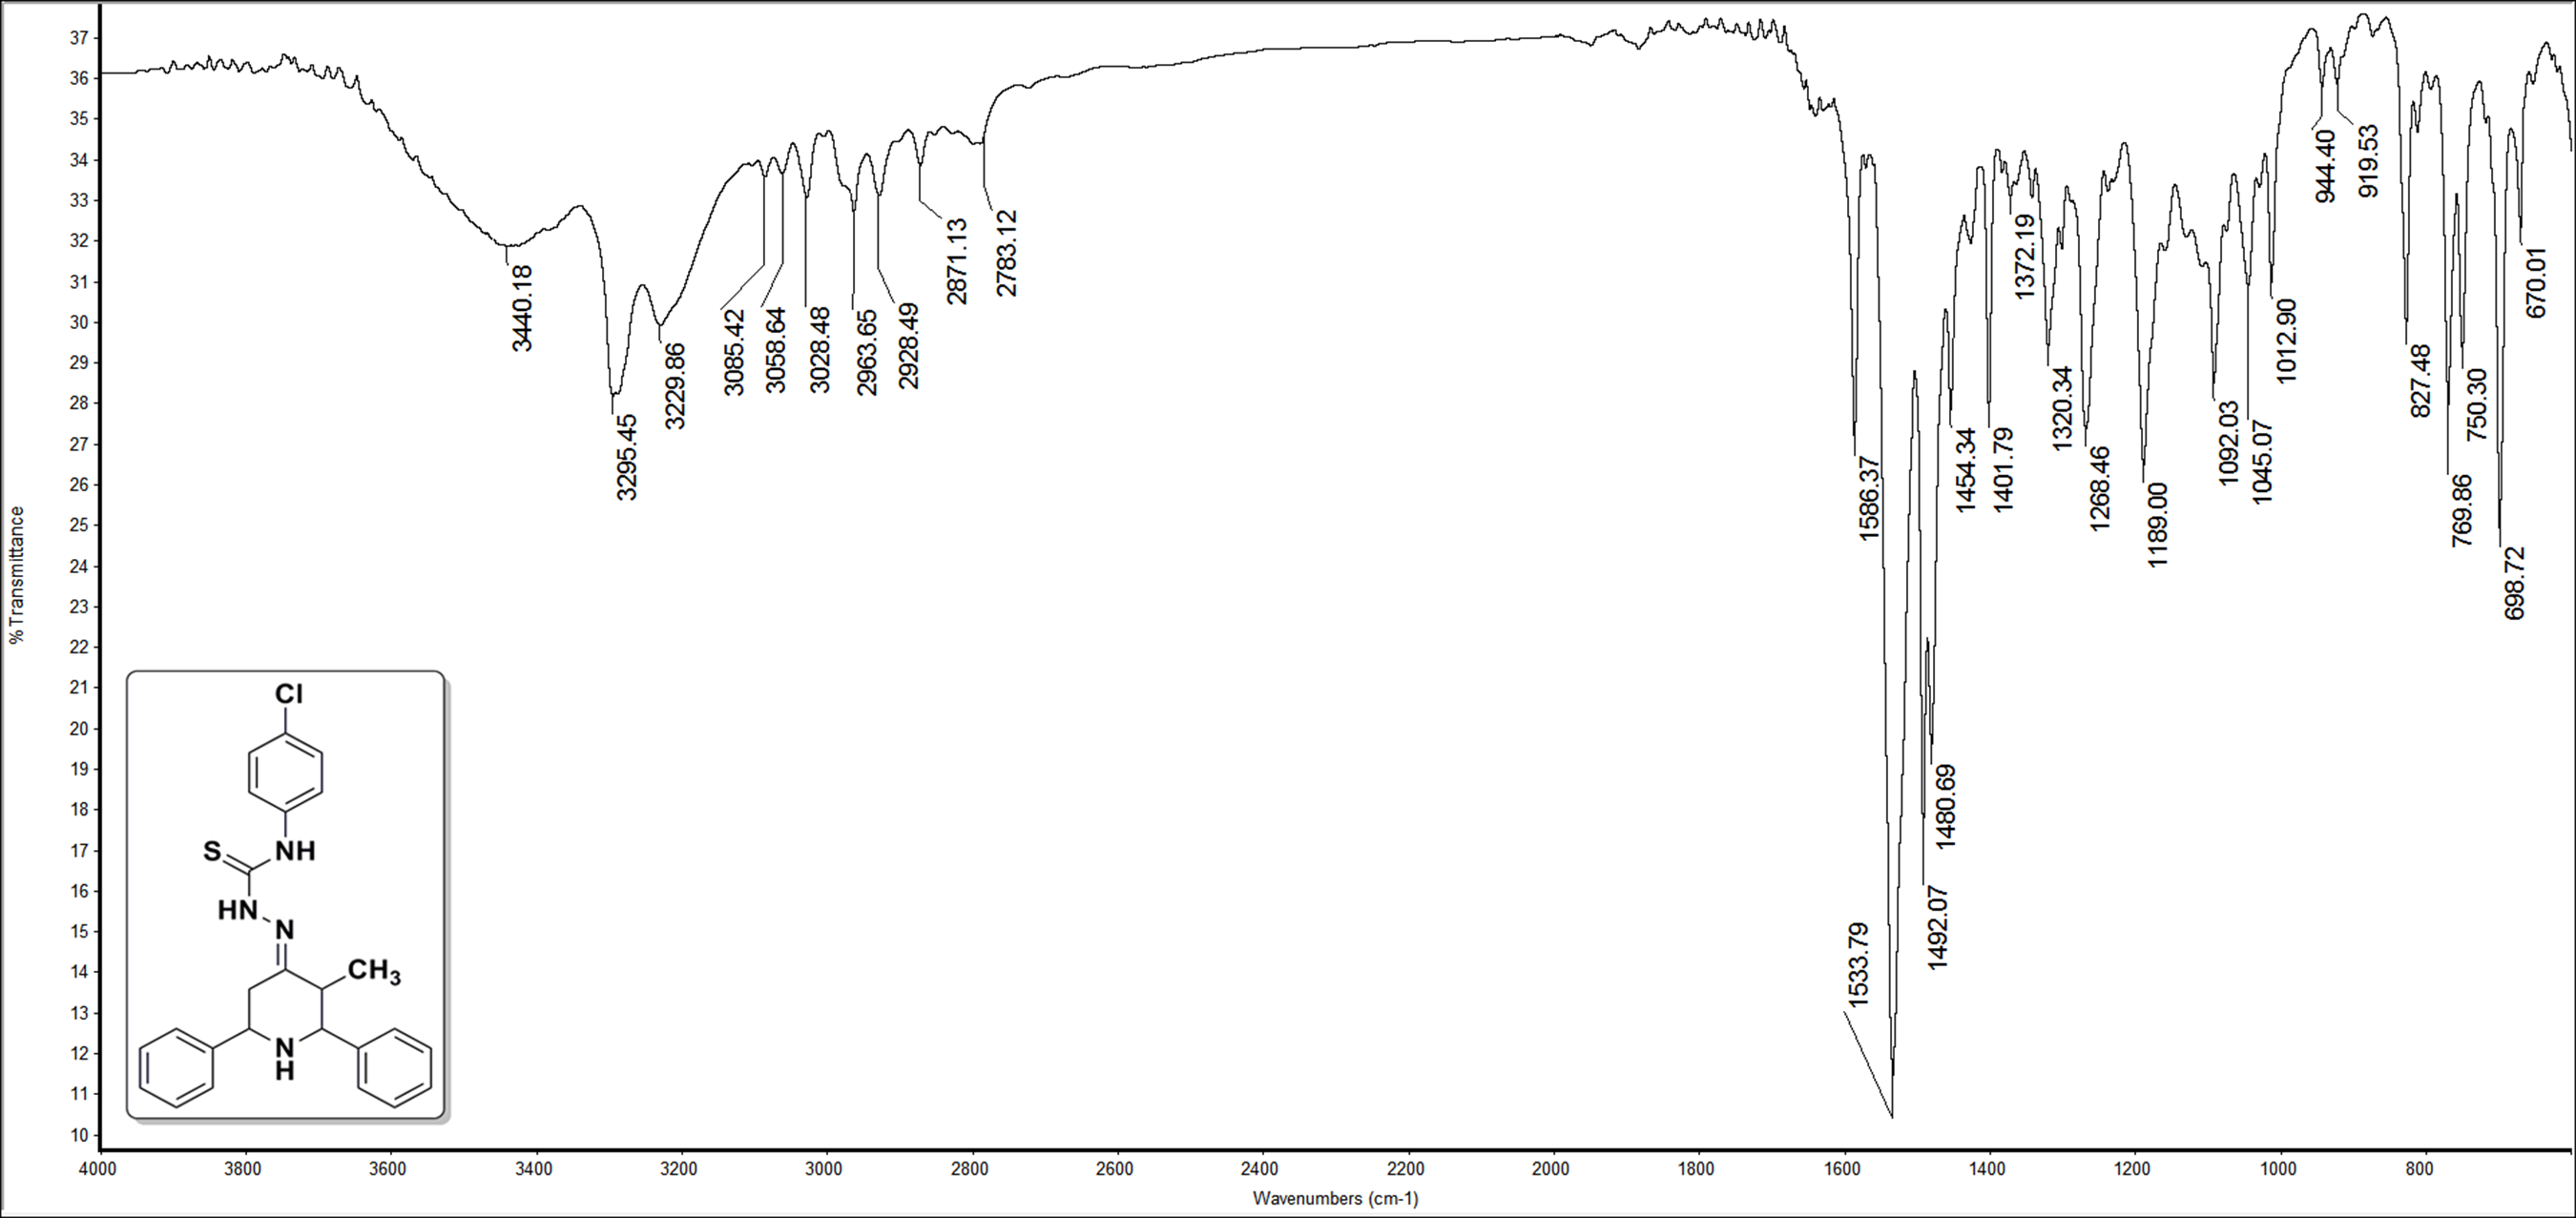


**Figure S 37:** FTIR spectrum of compound **10**


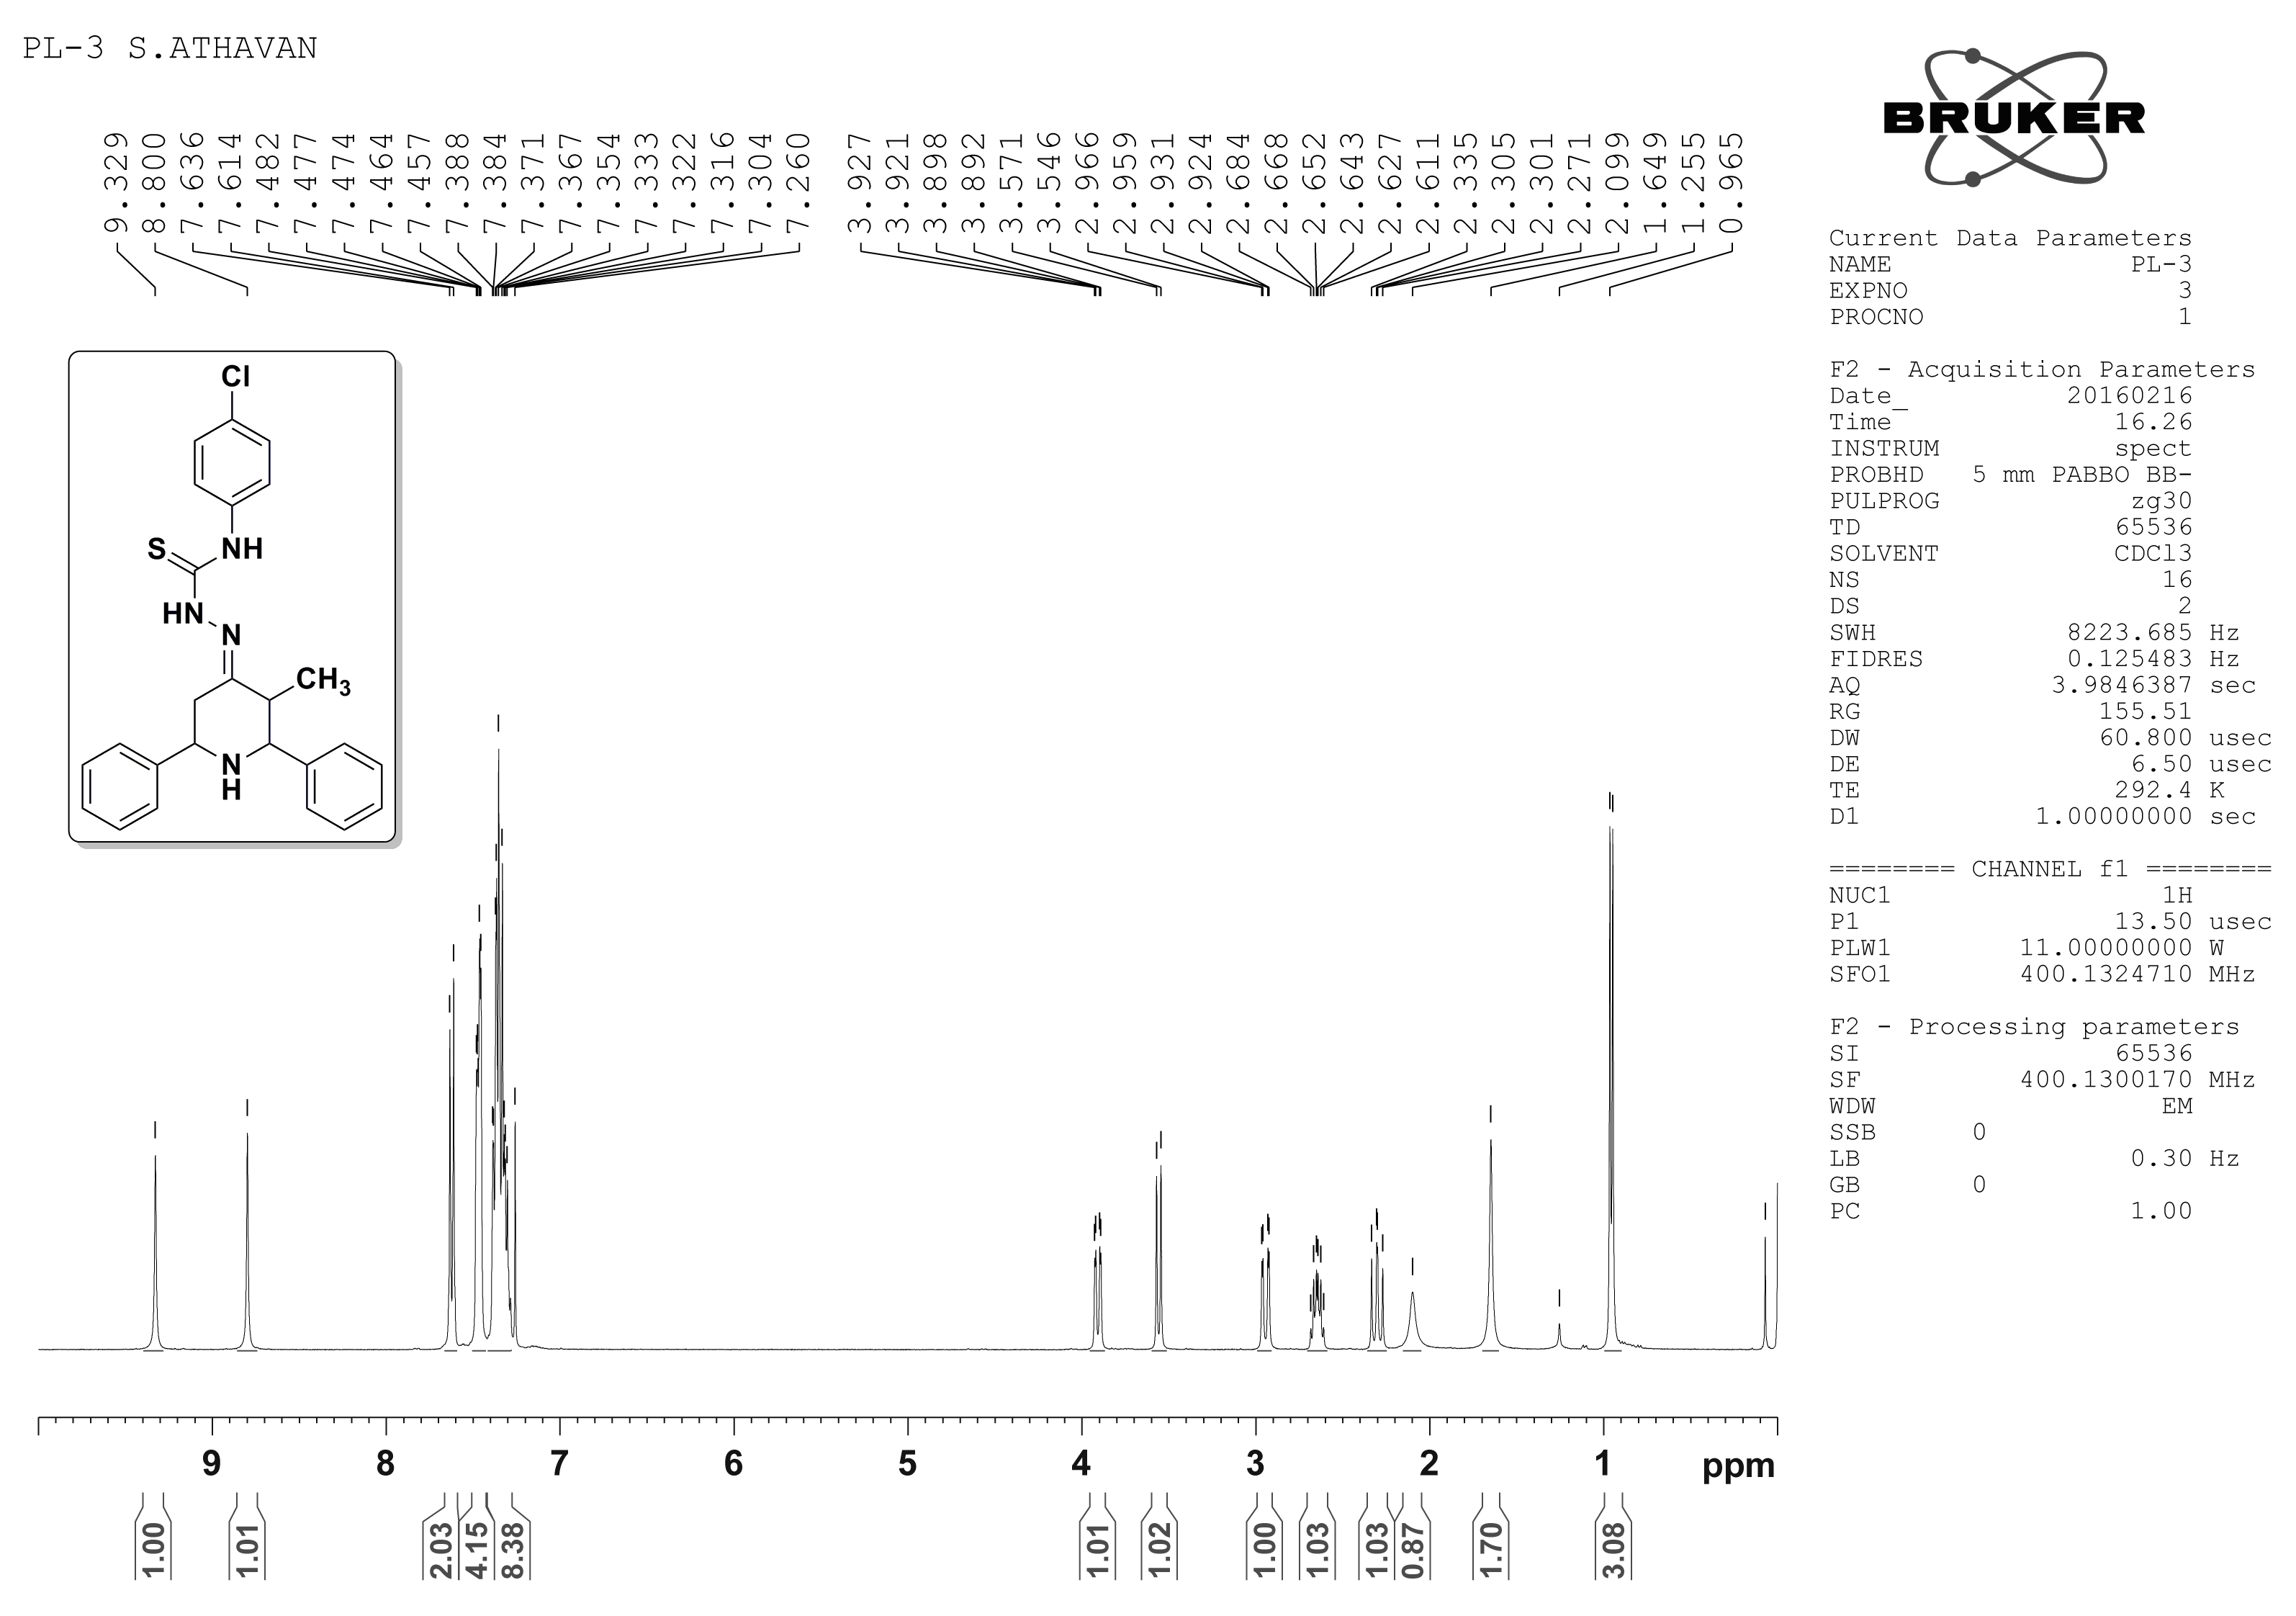


**Figure S 38:** 1H NMR of compound **10**


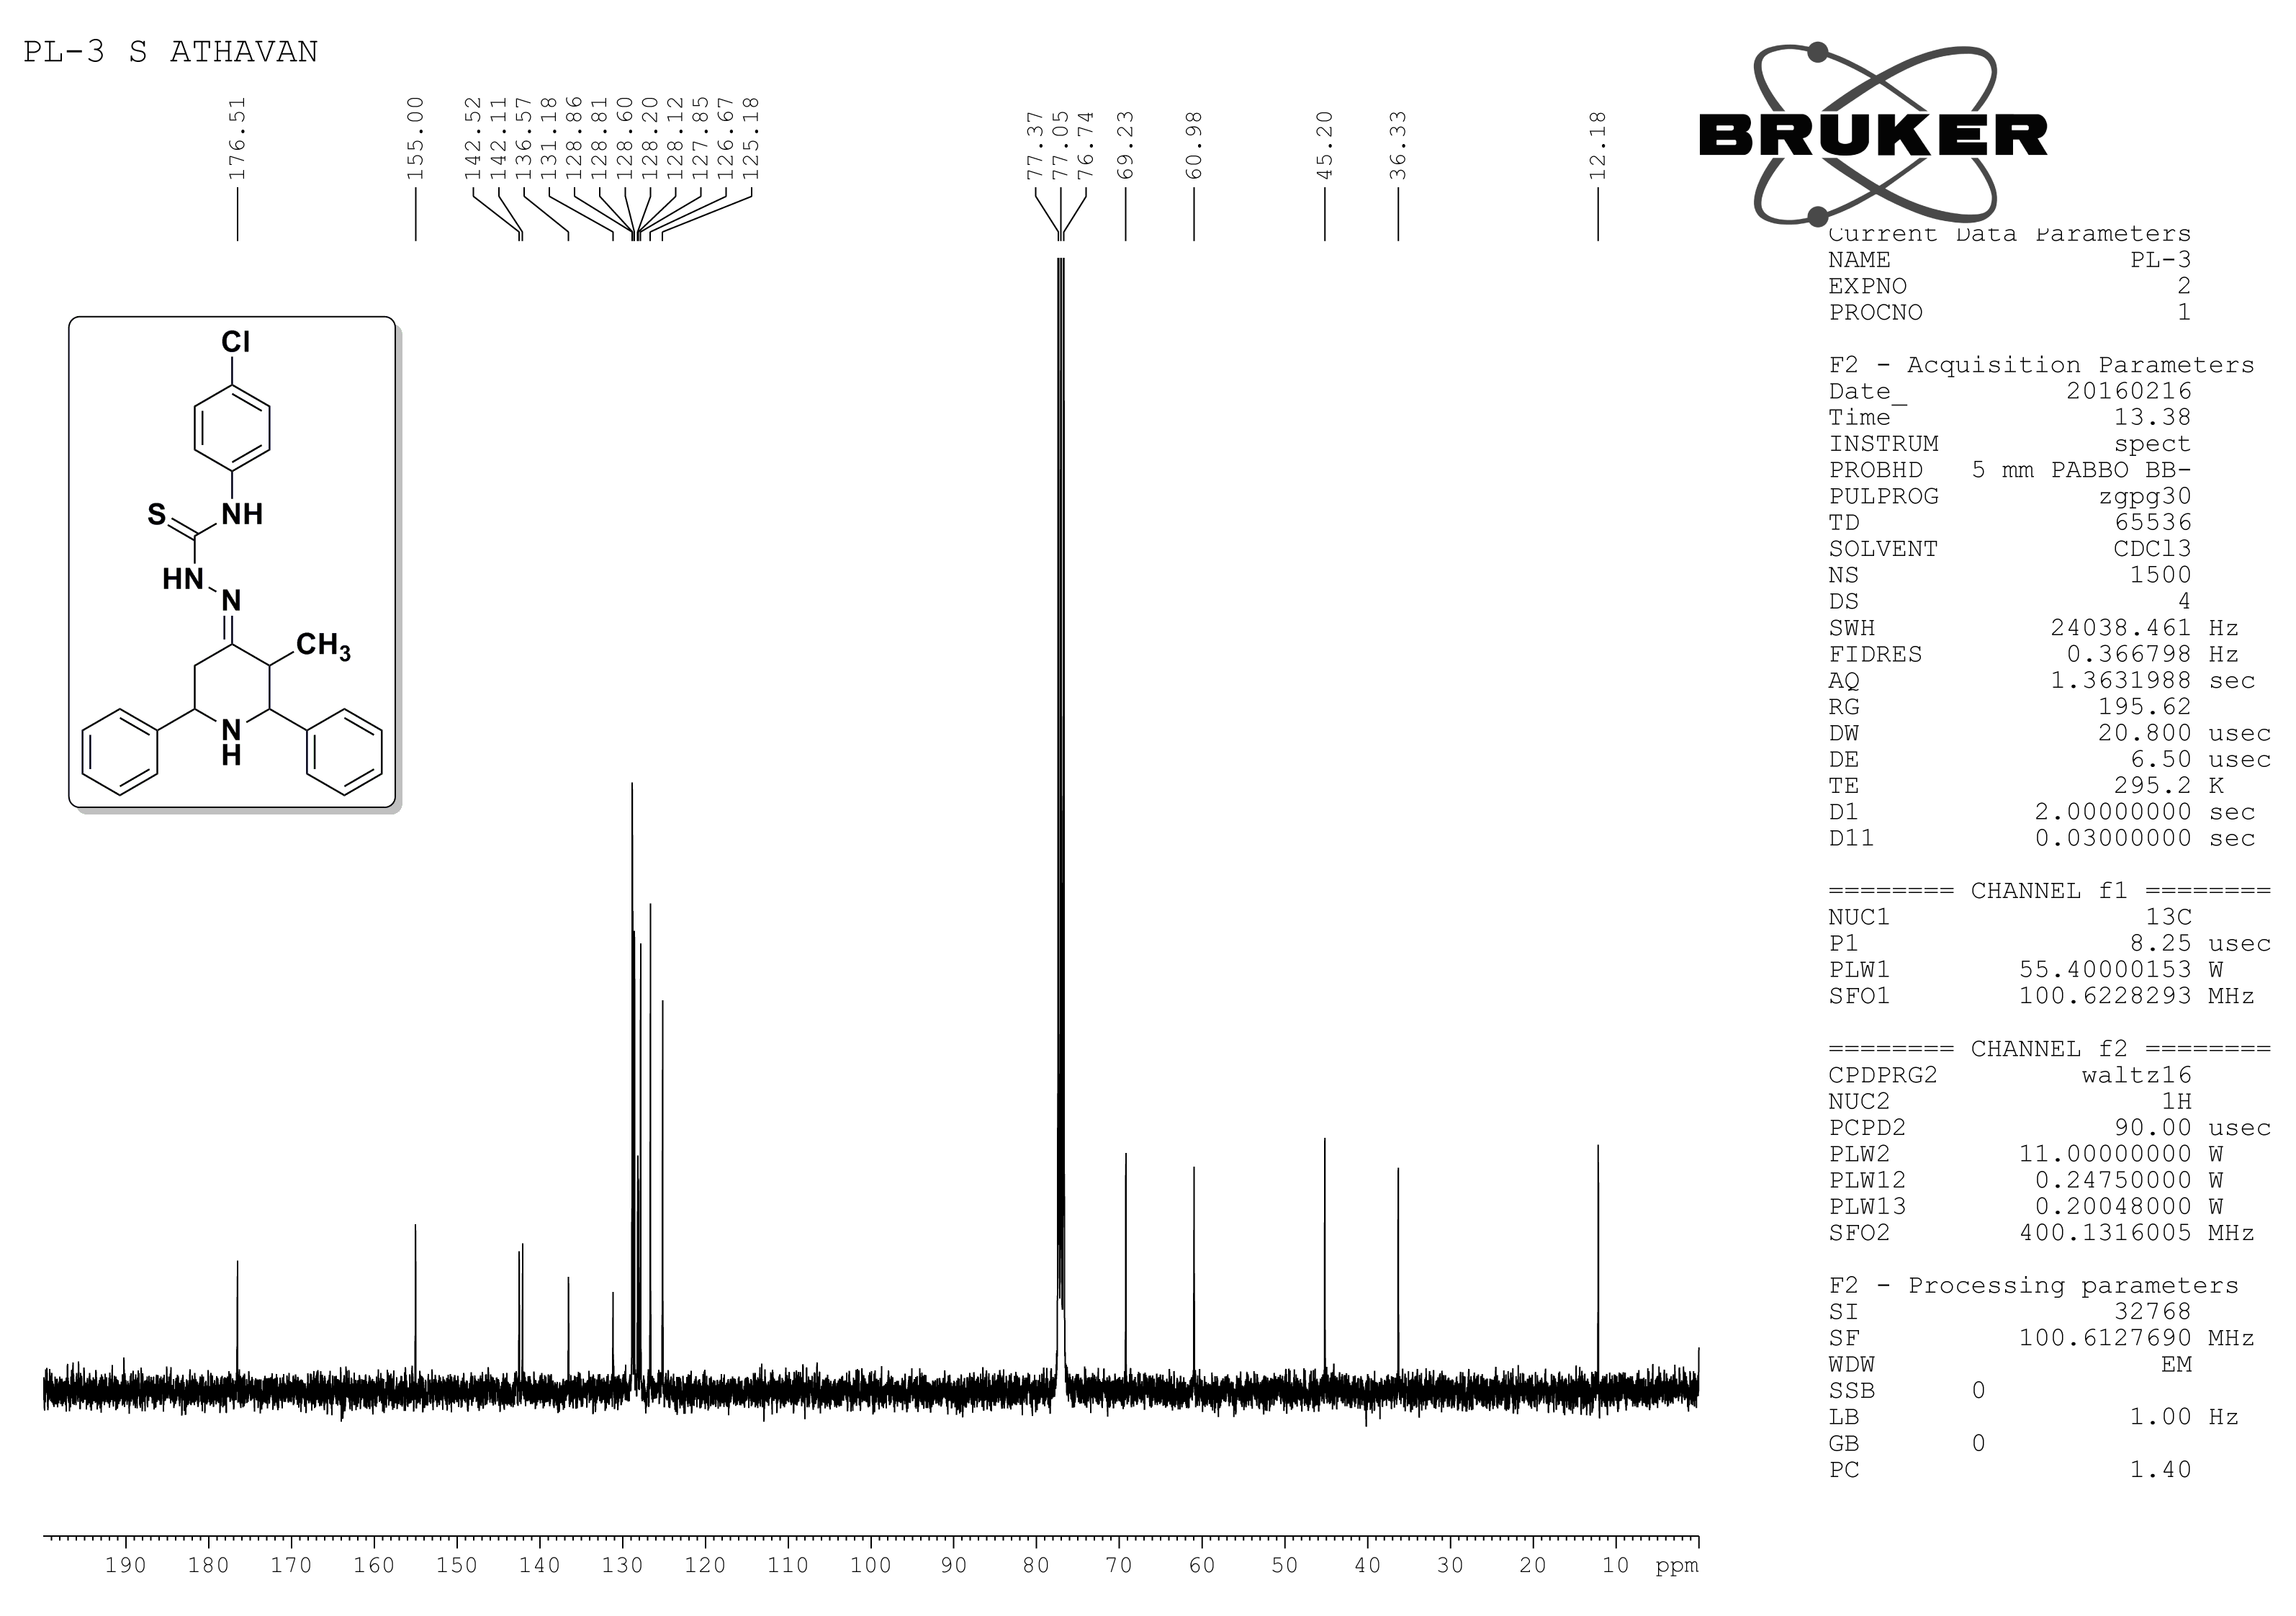


**Figure S 39:** 13C NMR of compound **10**


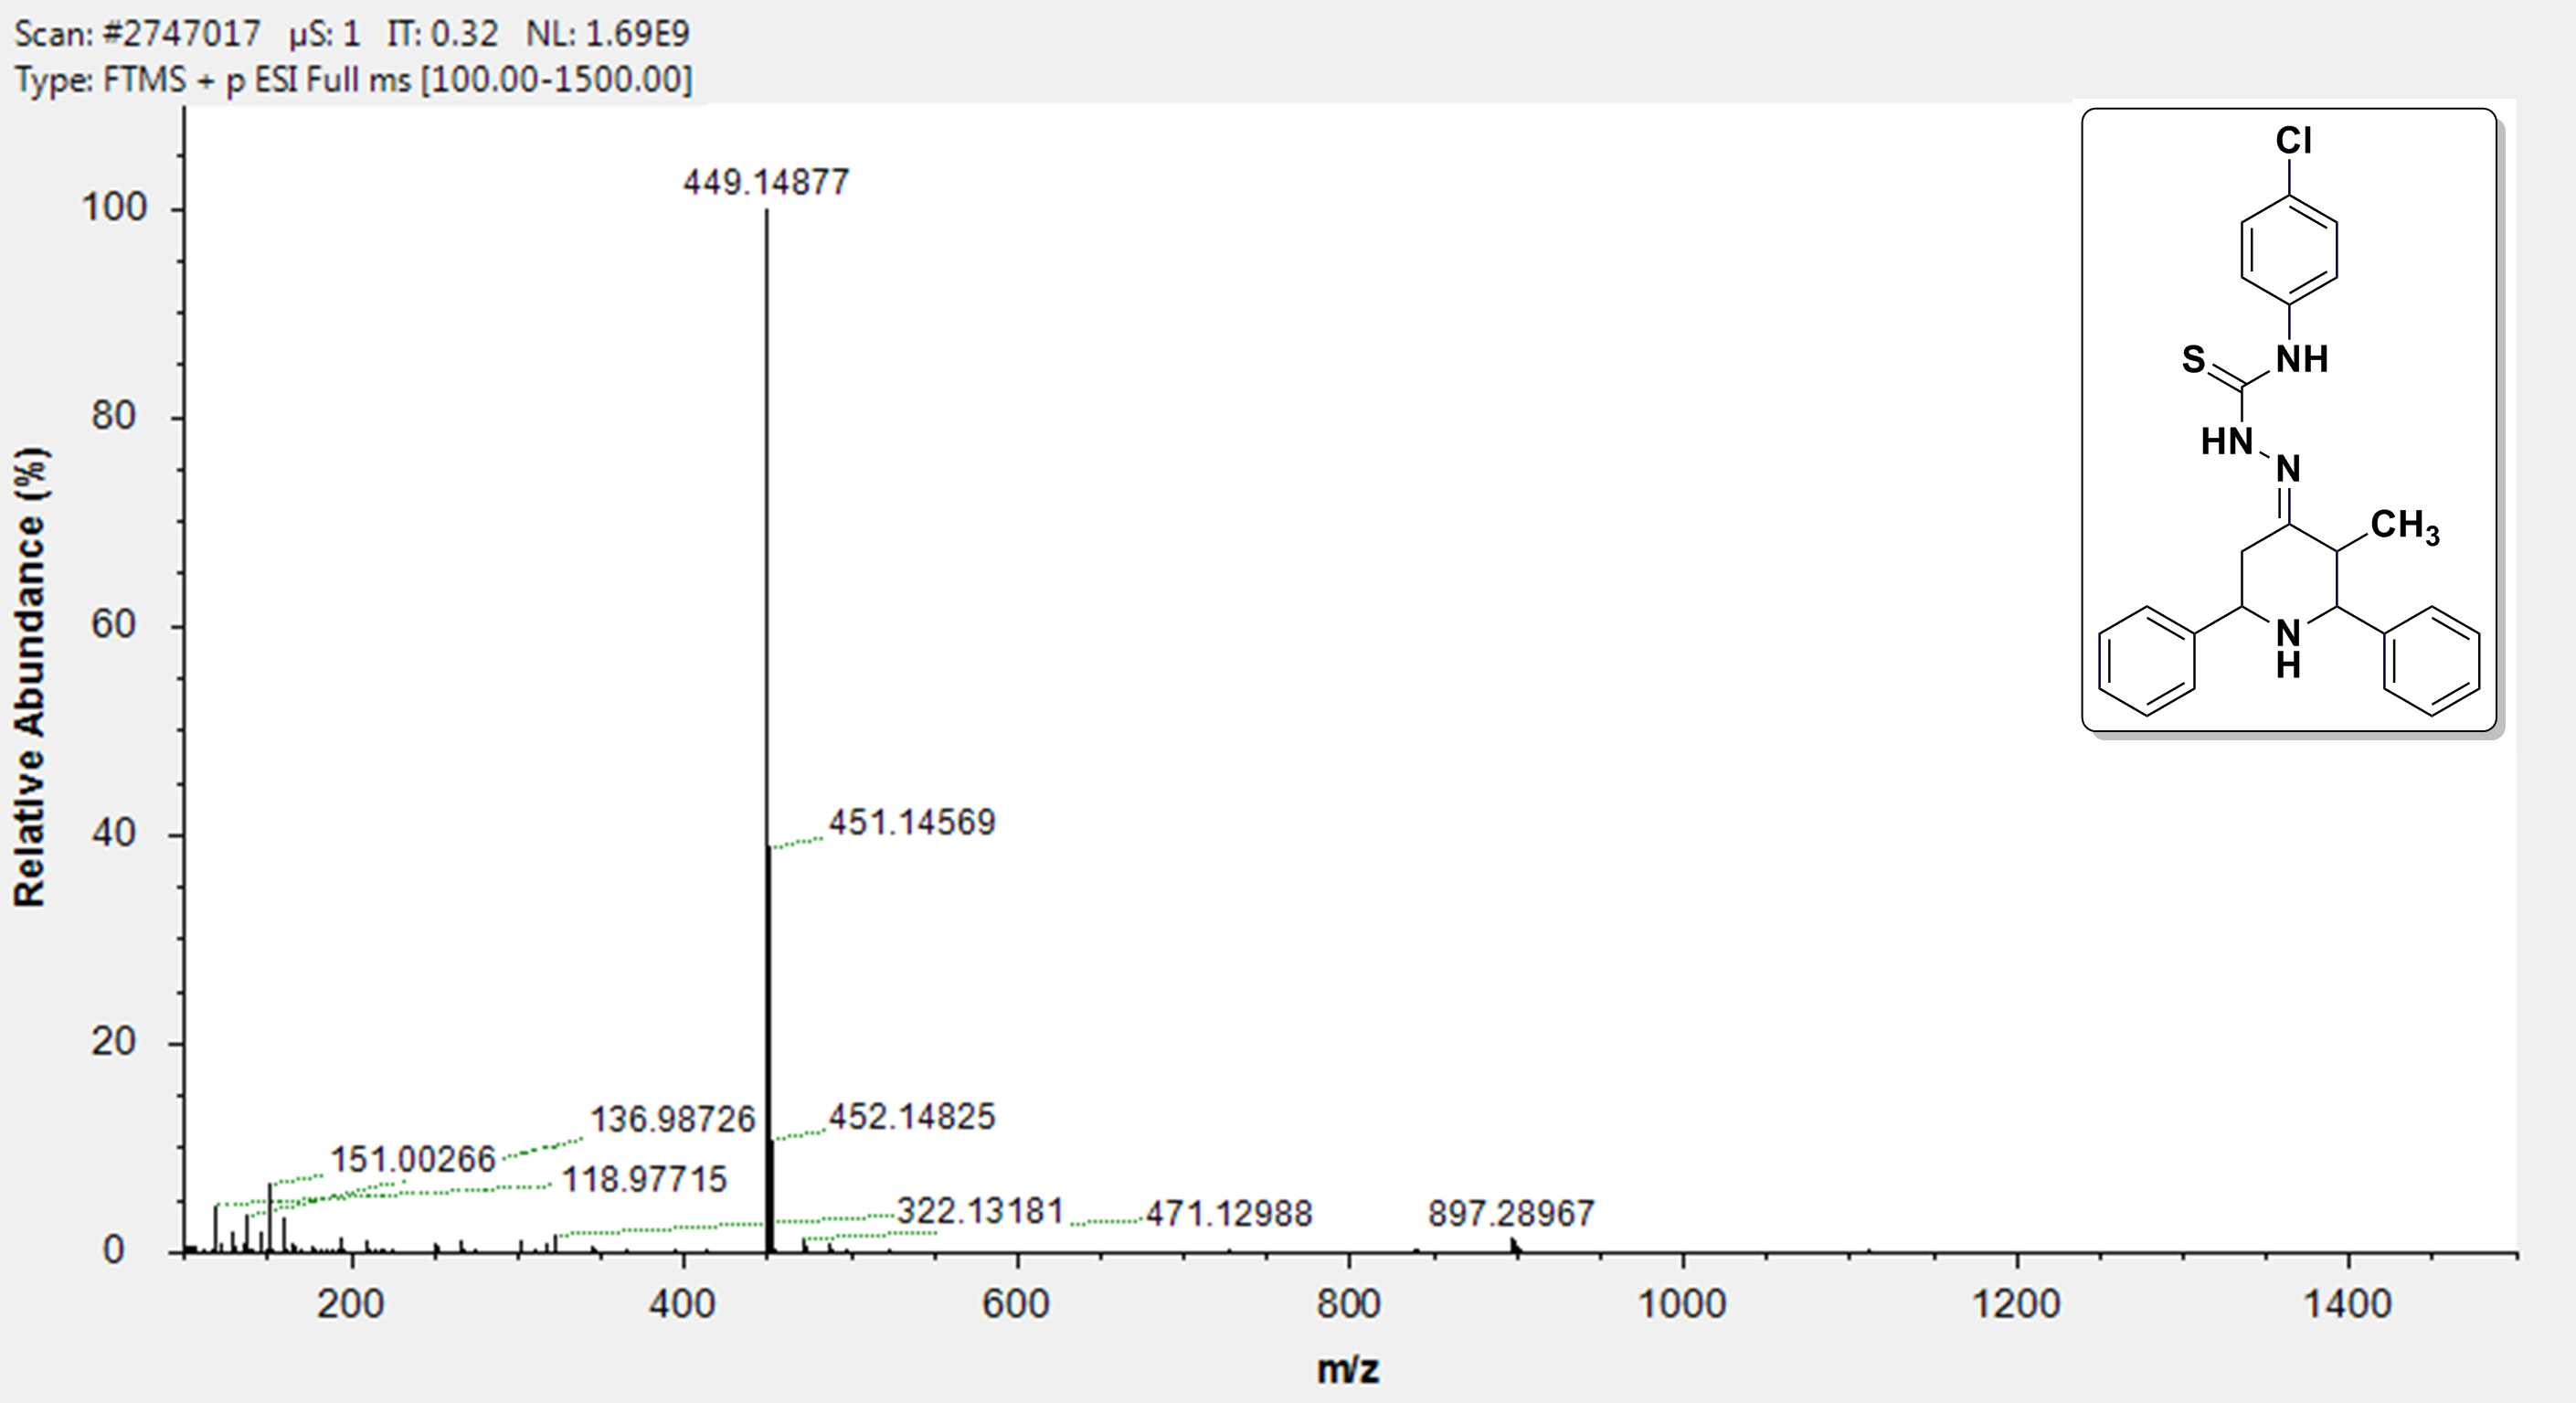


**Figure S 40:** Mass spectrum of compound **10**


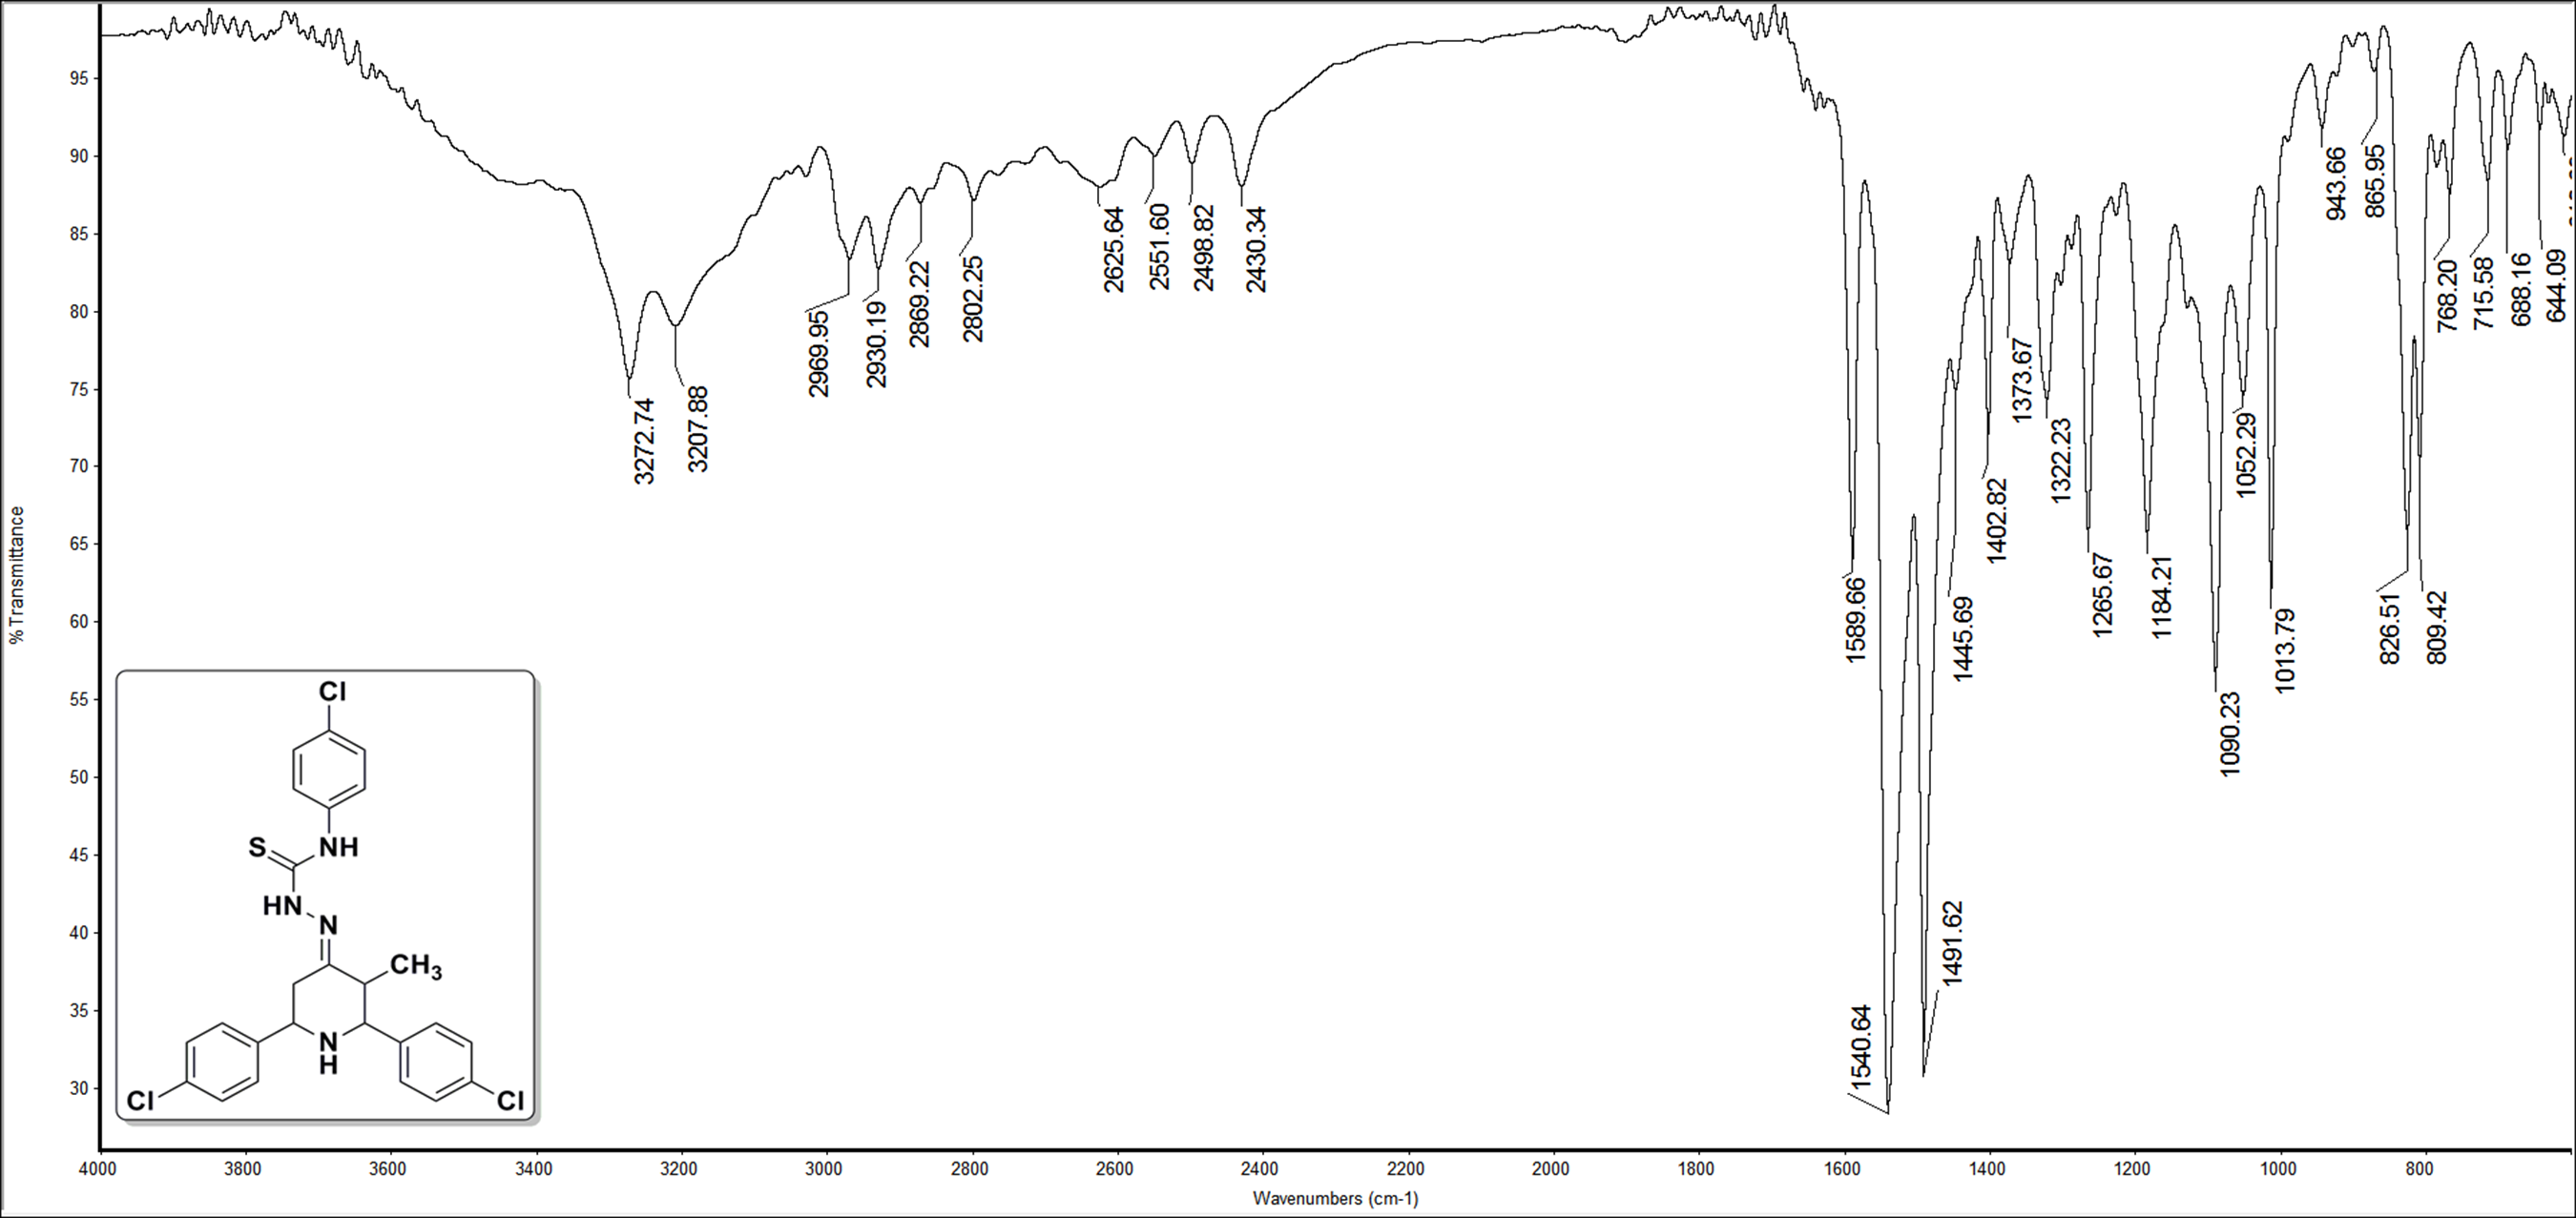


**Figure S 41:** FTIR spectrum of compound **11**


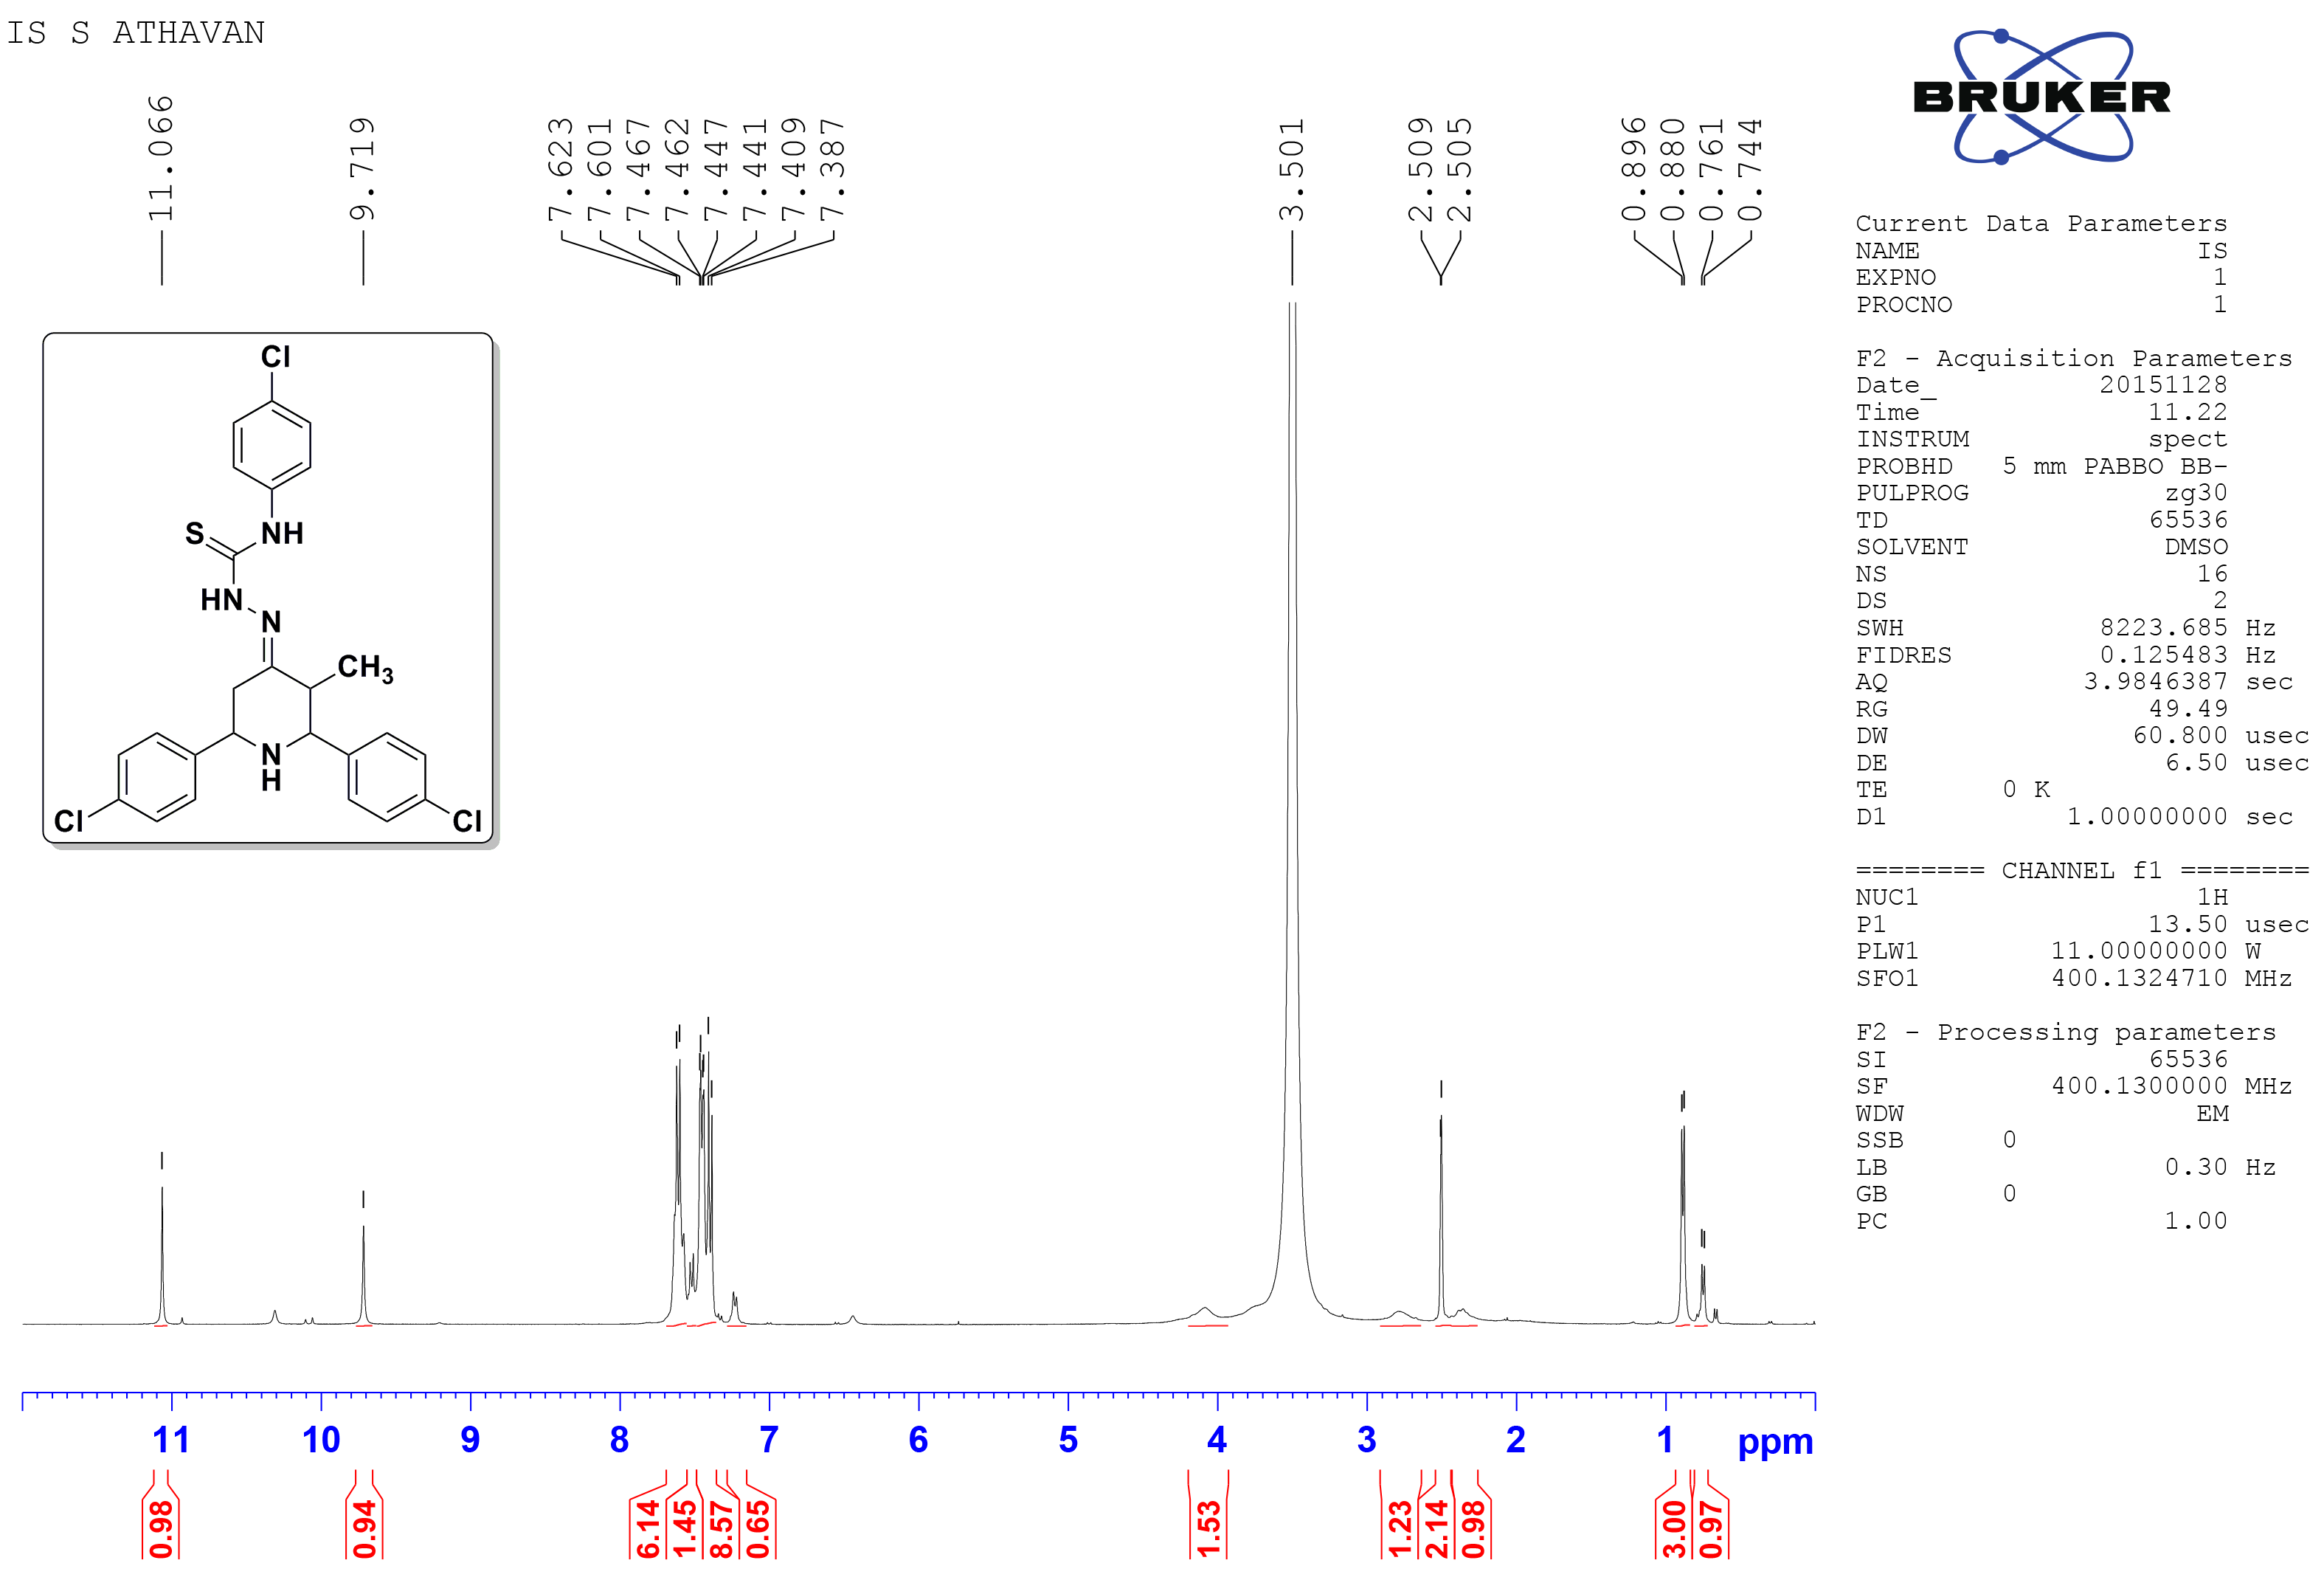


**Figure S 42:** 1H NMR of compound **11**


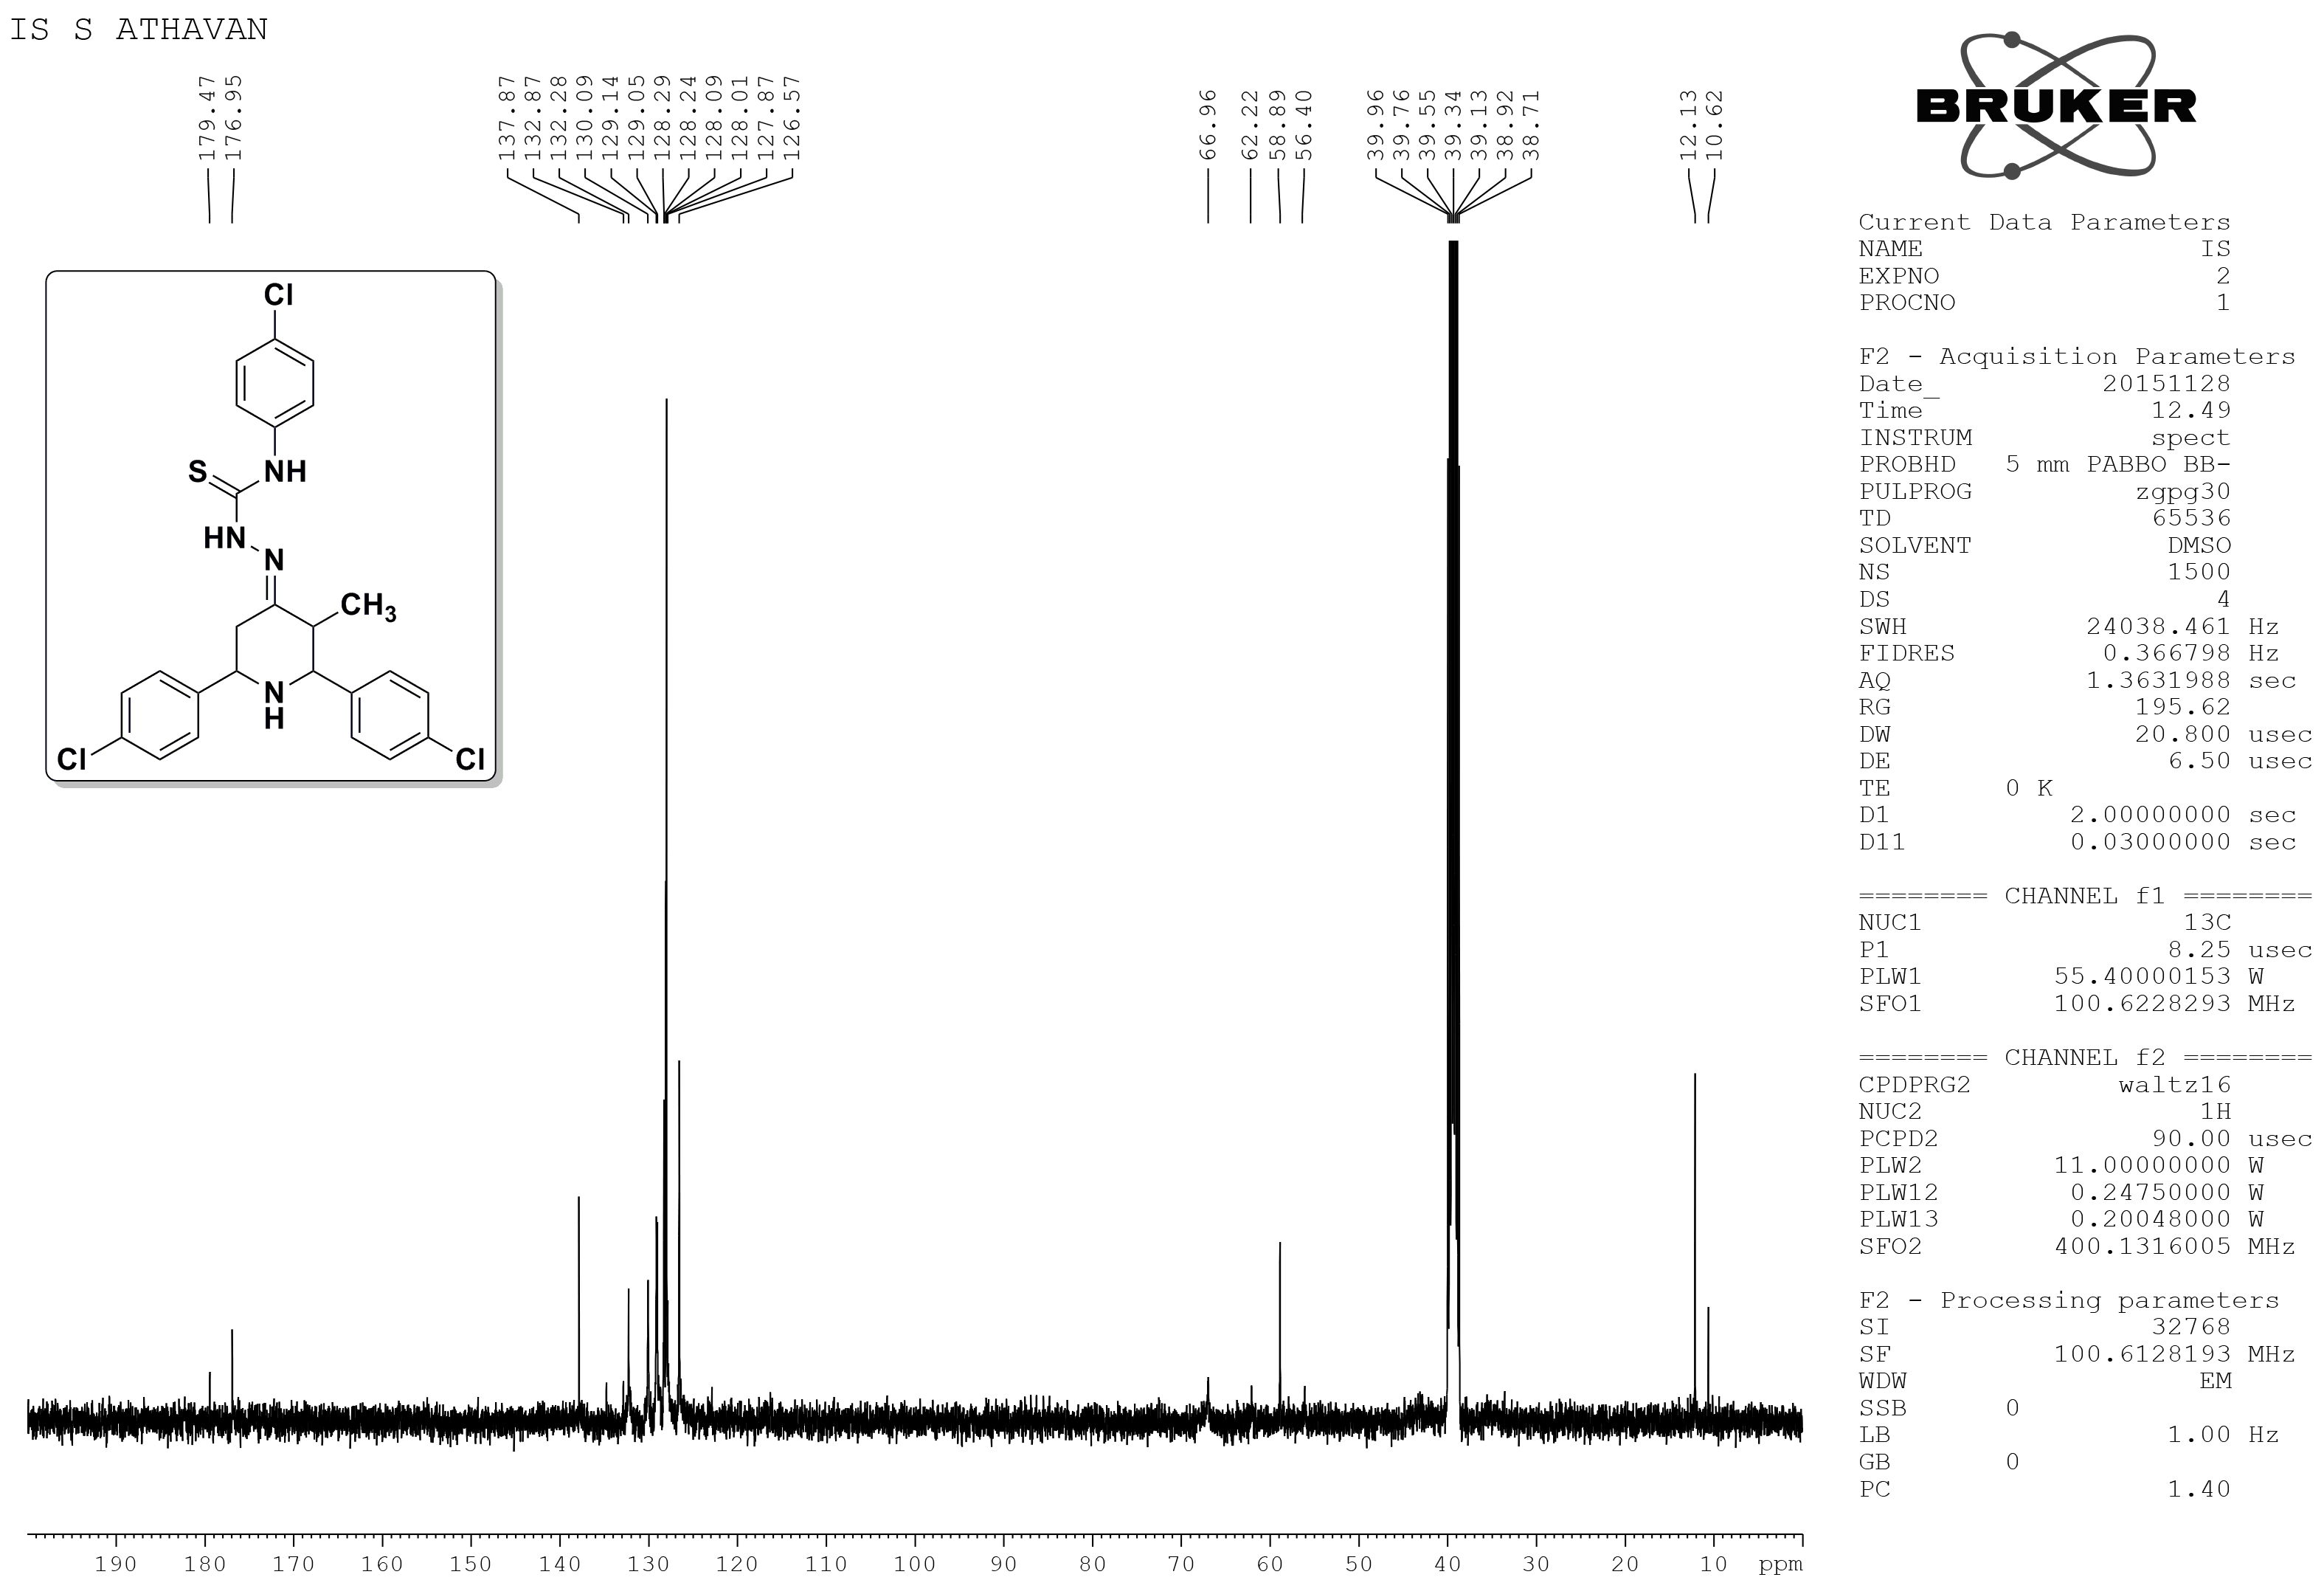


**Figure S 43:** 13C NMR of compound **11**


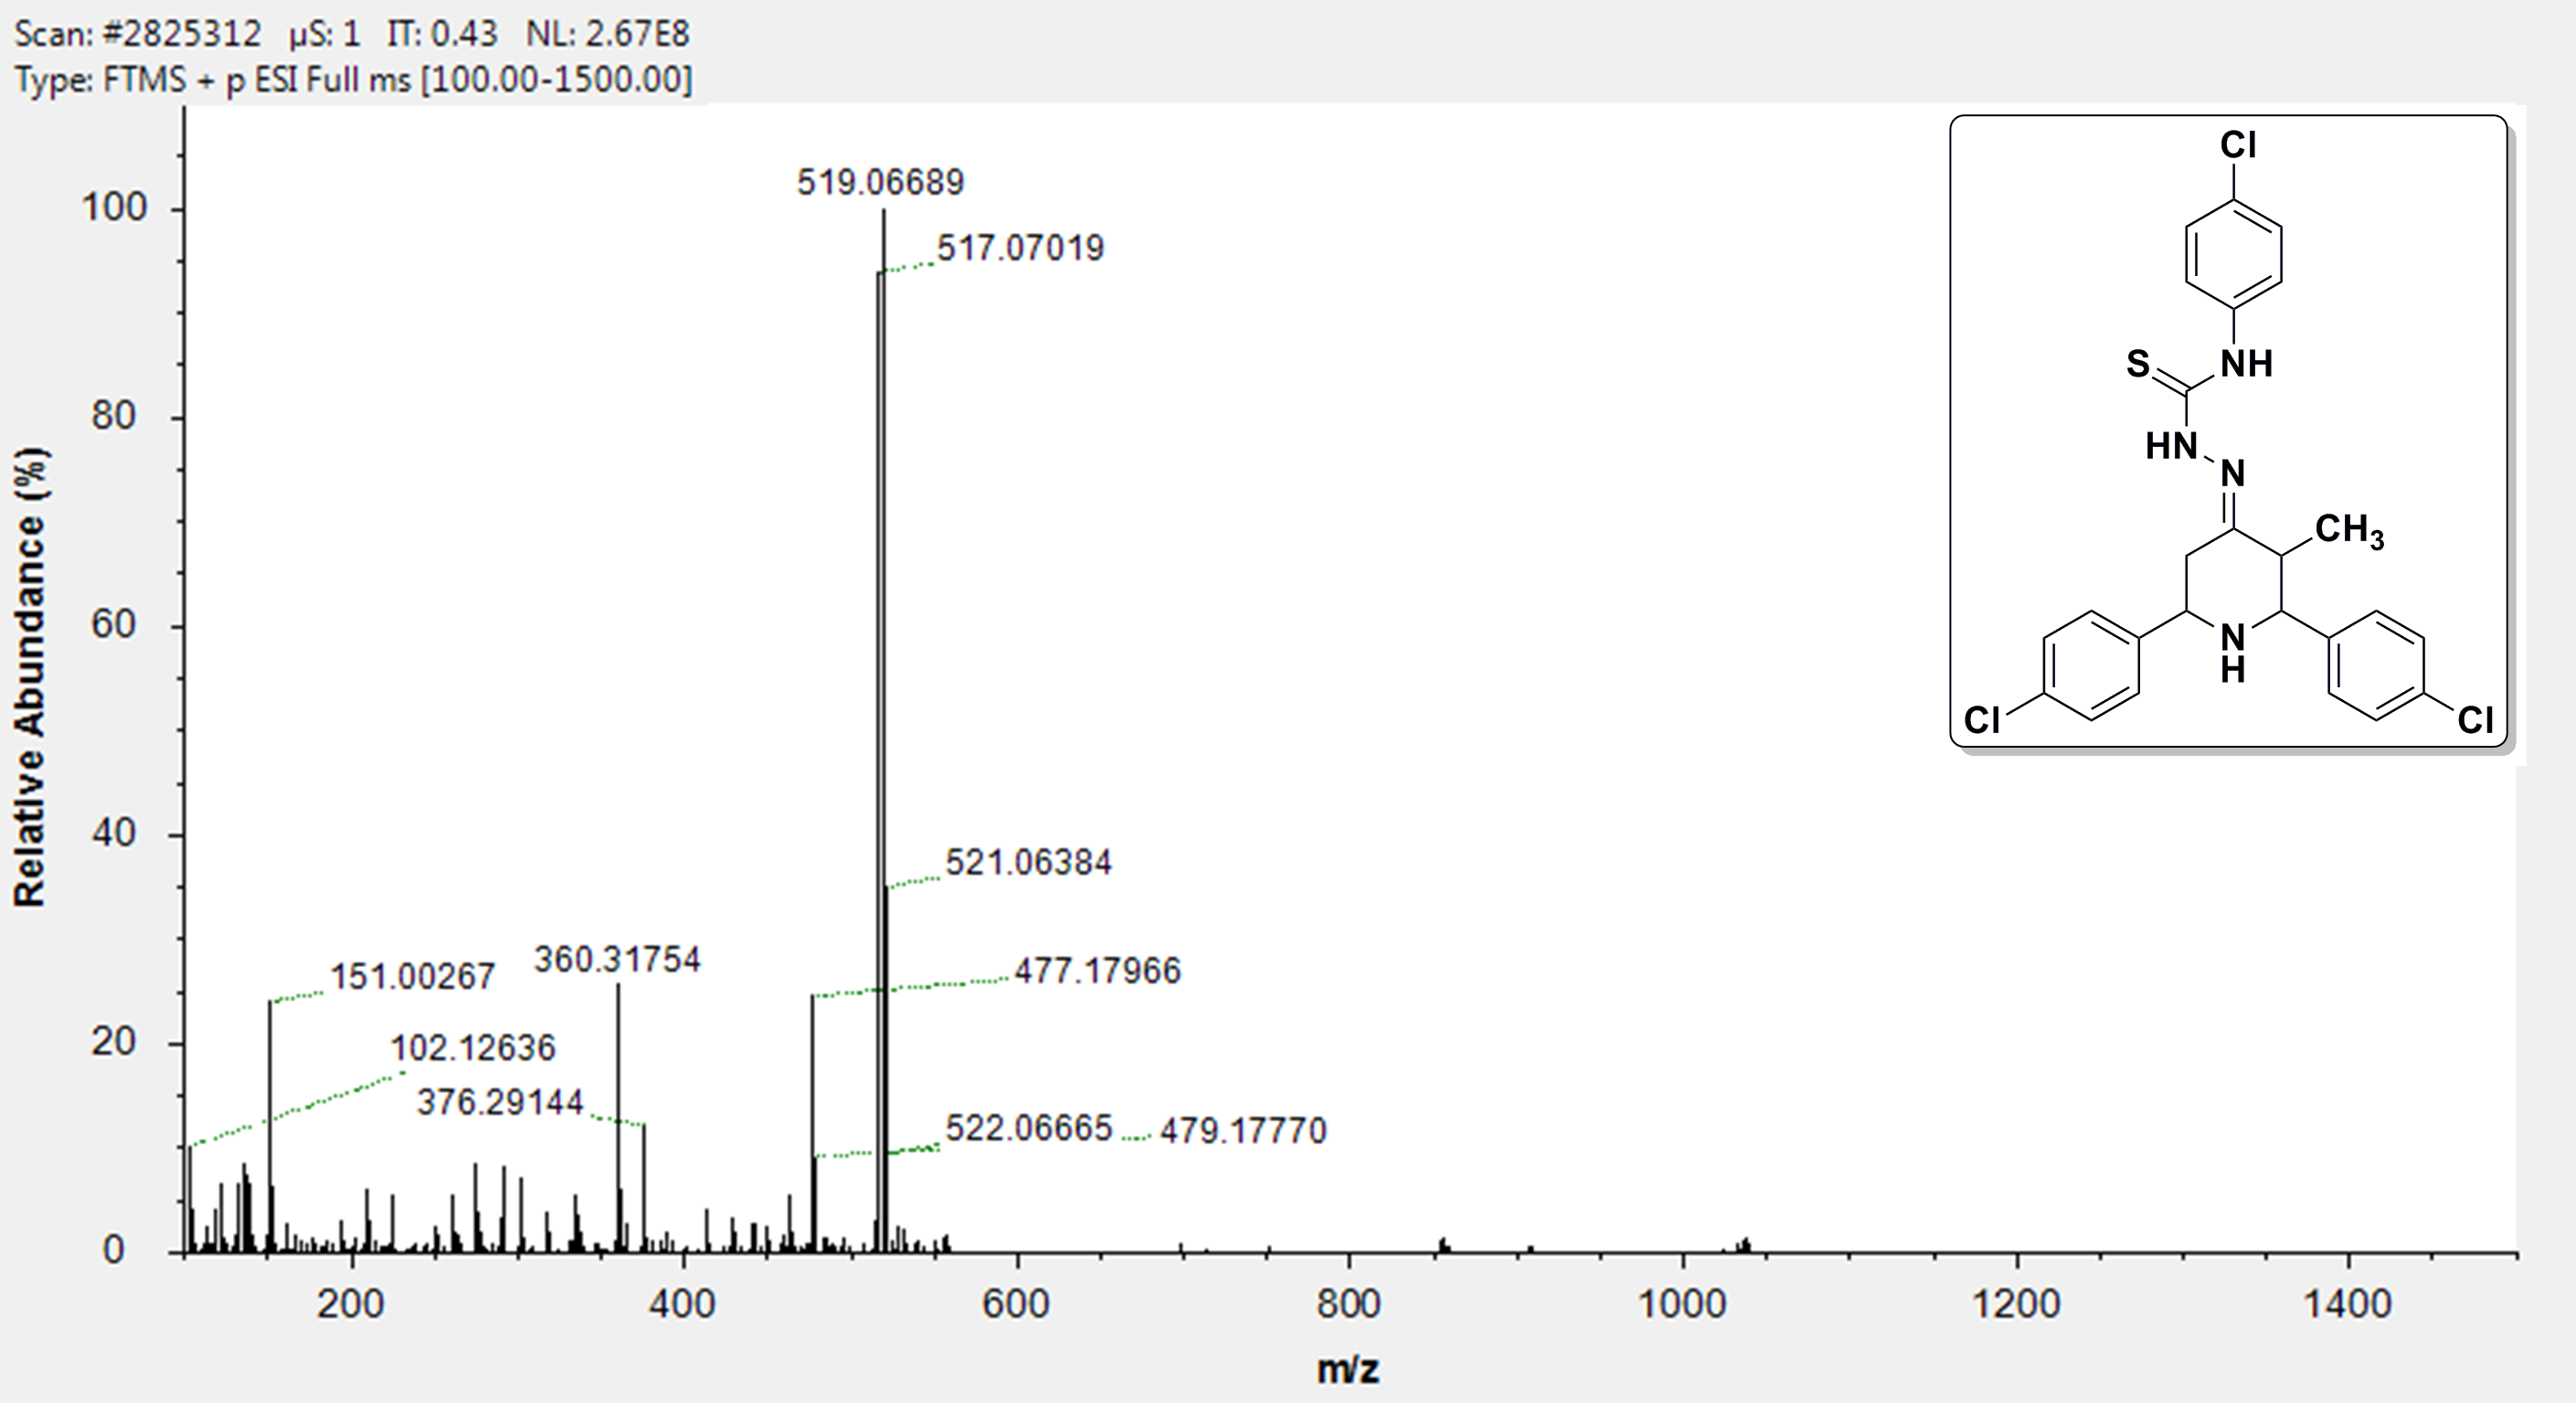


**Figure S 44:** Mass spectrum of compound **11**


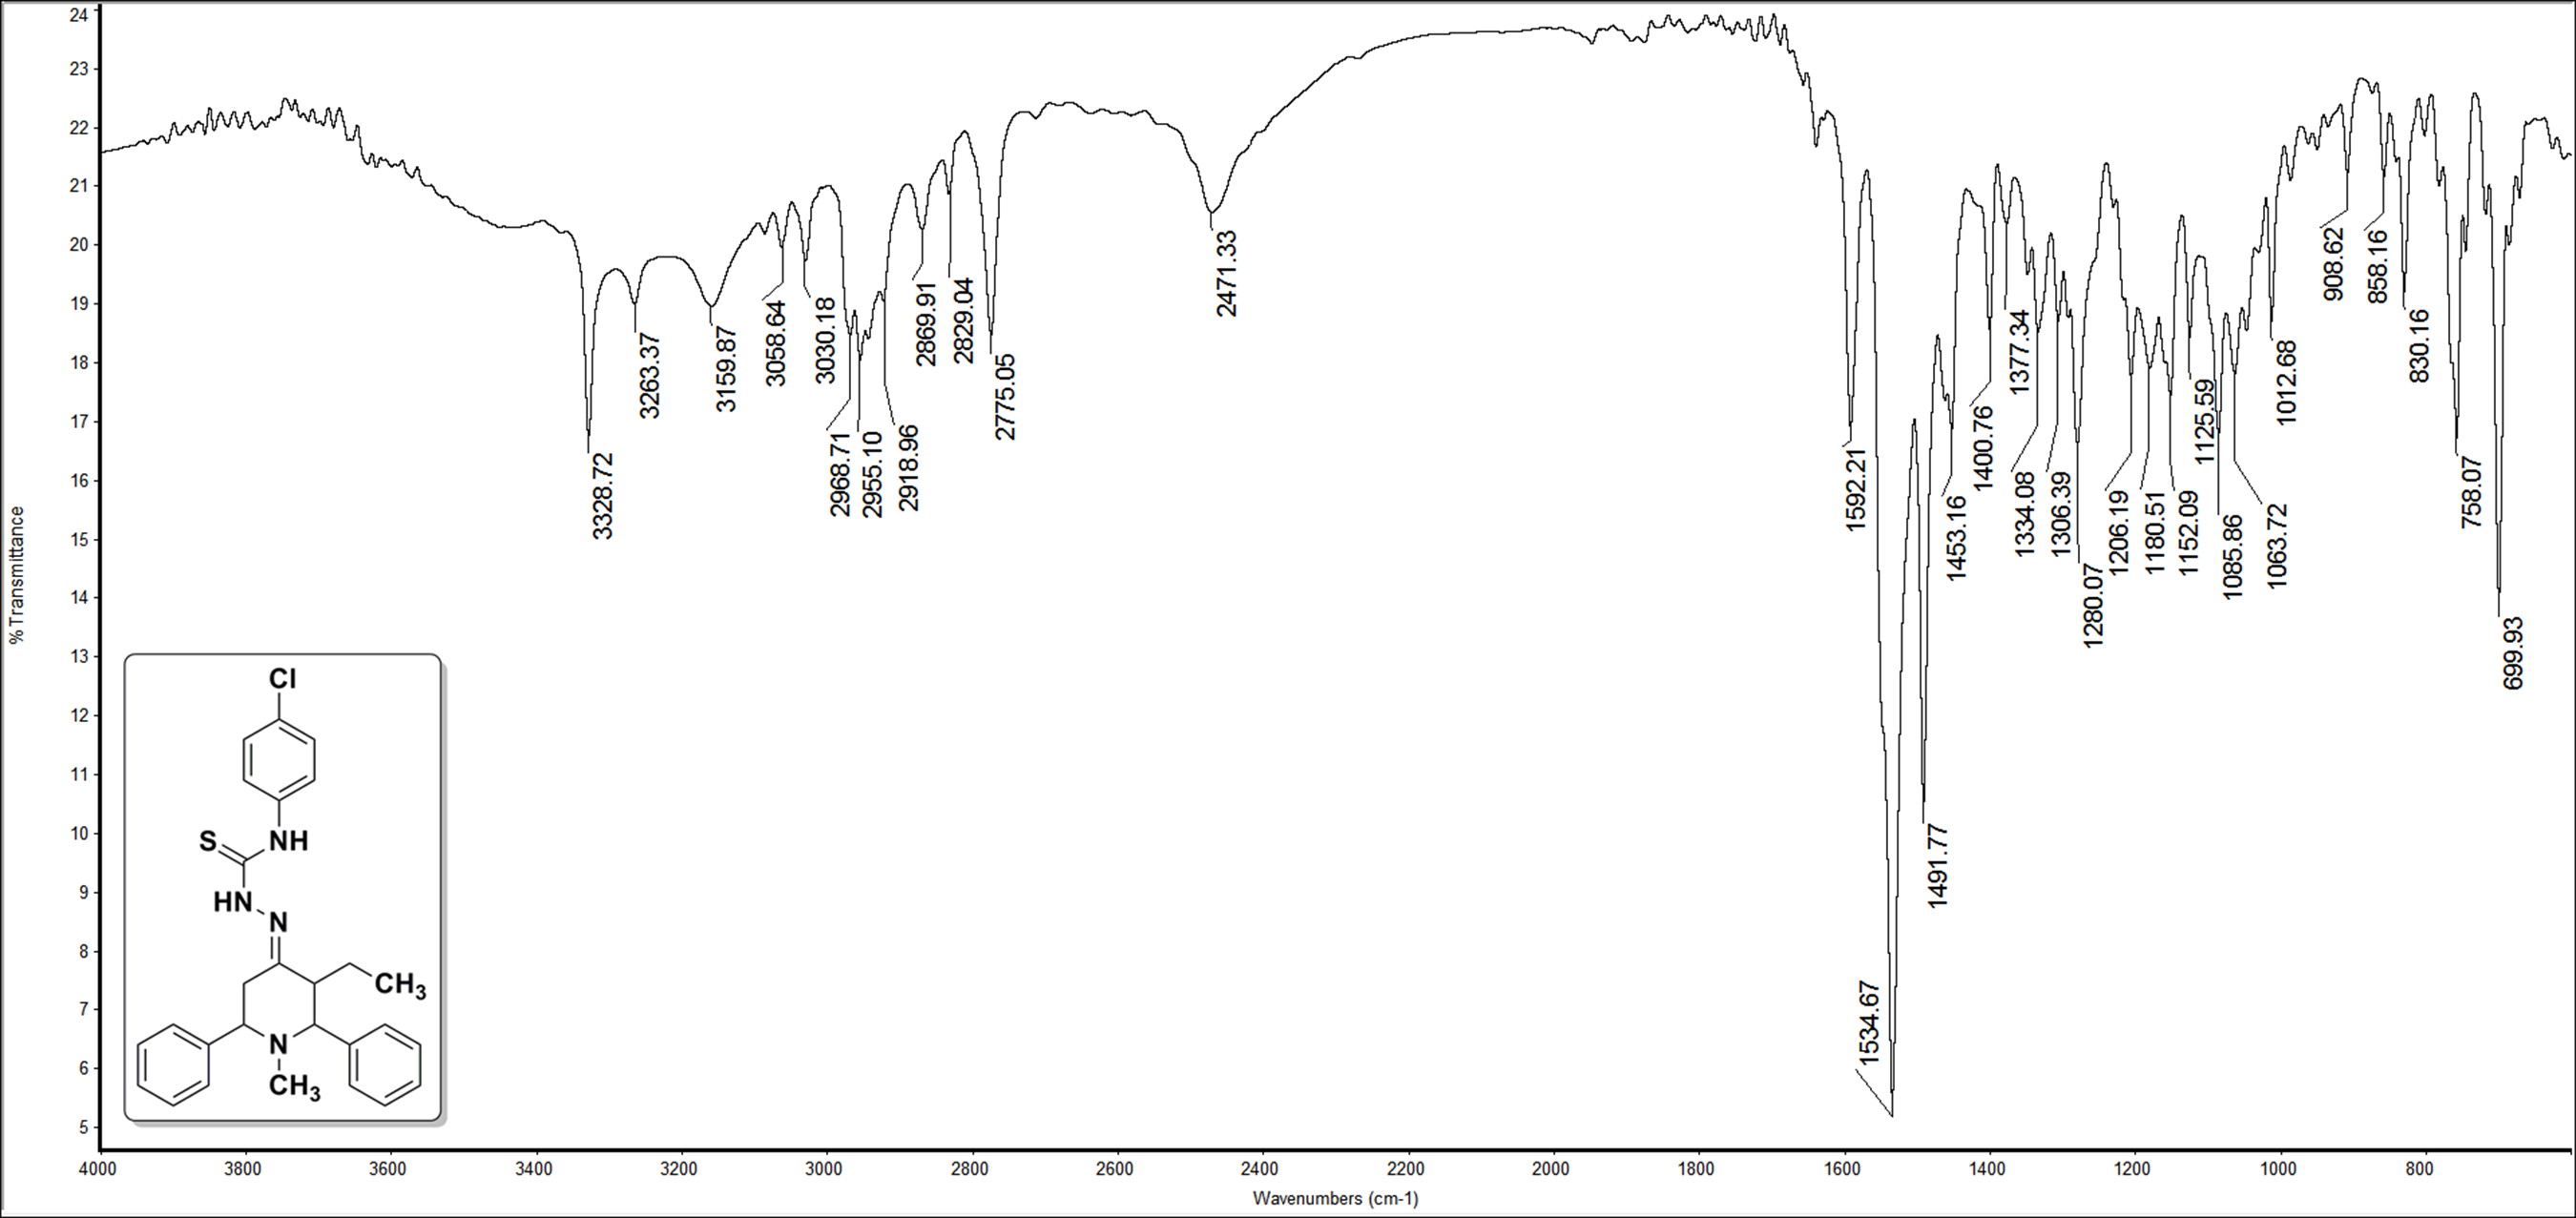


**Figure S 45:** FTIR spectrum of compound **12**

**
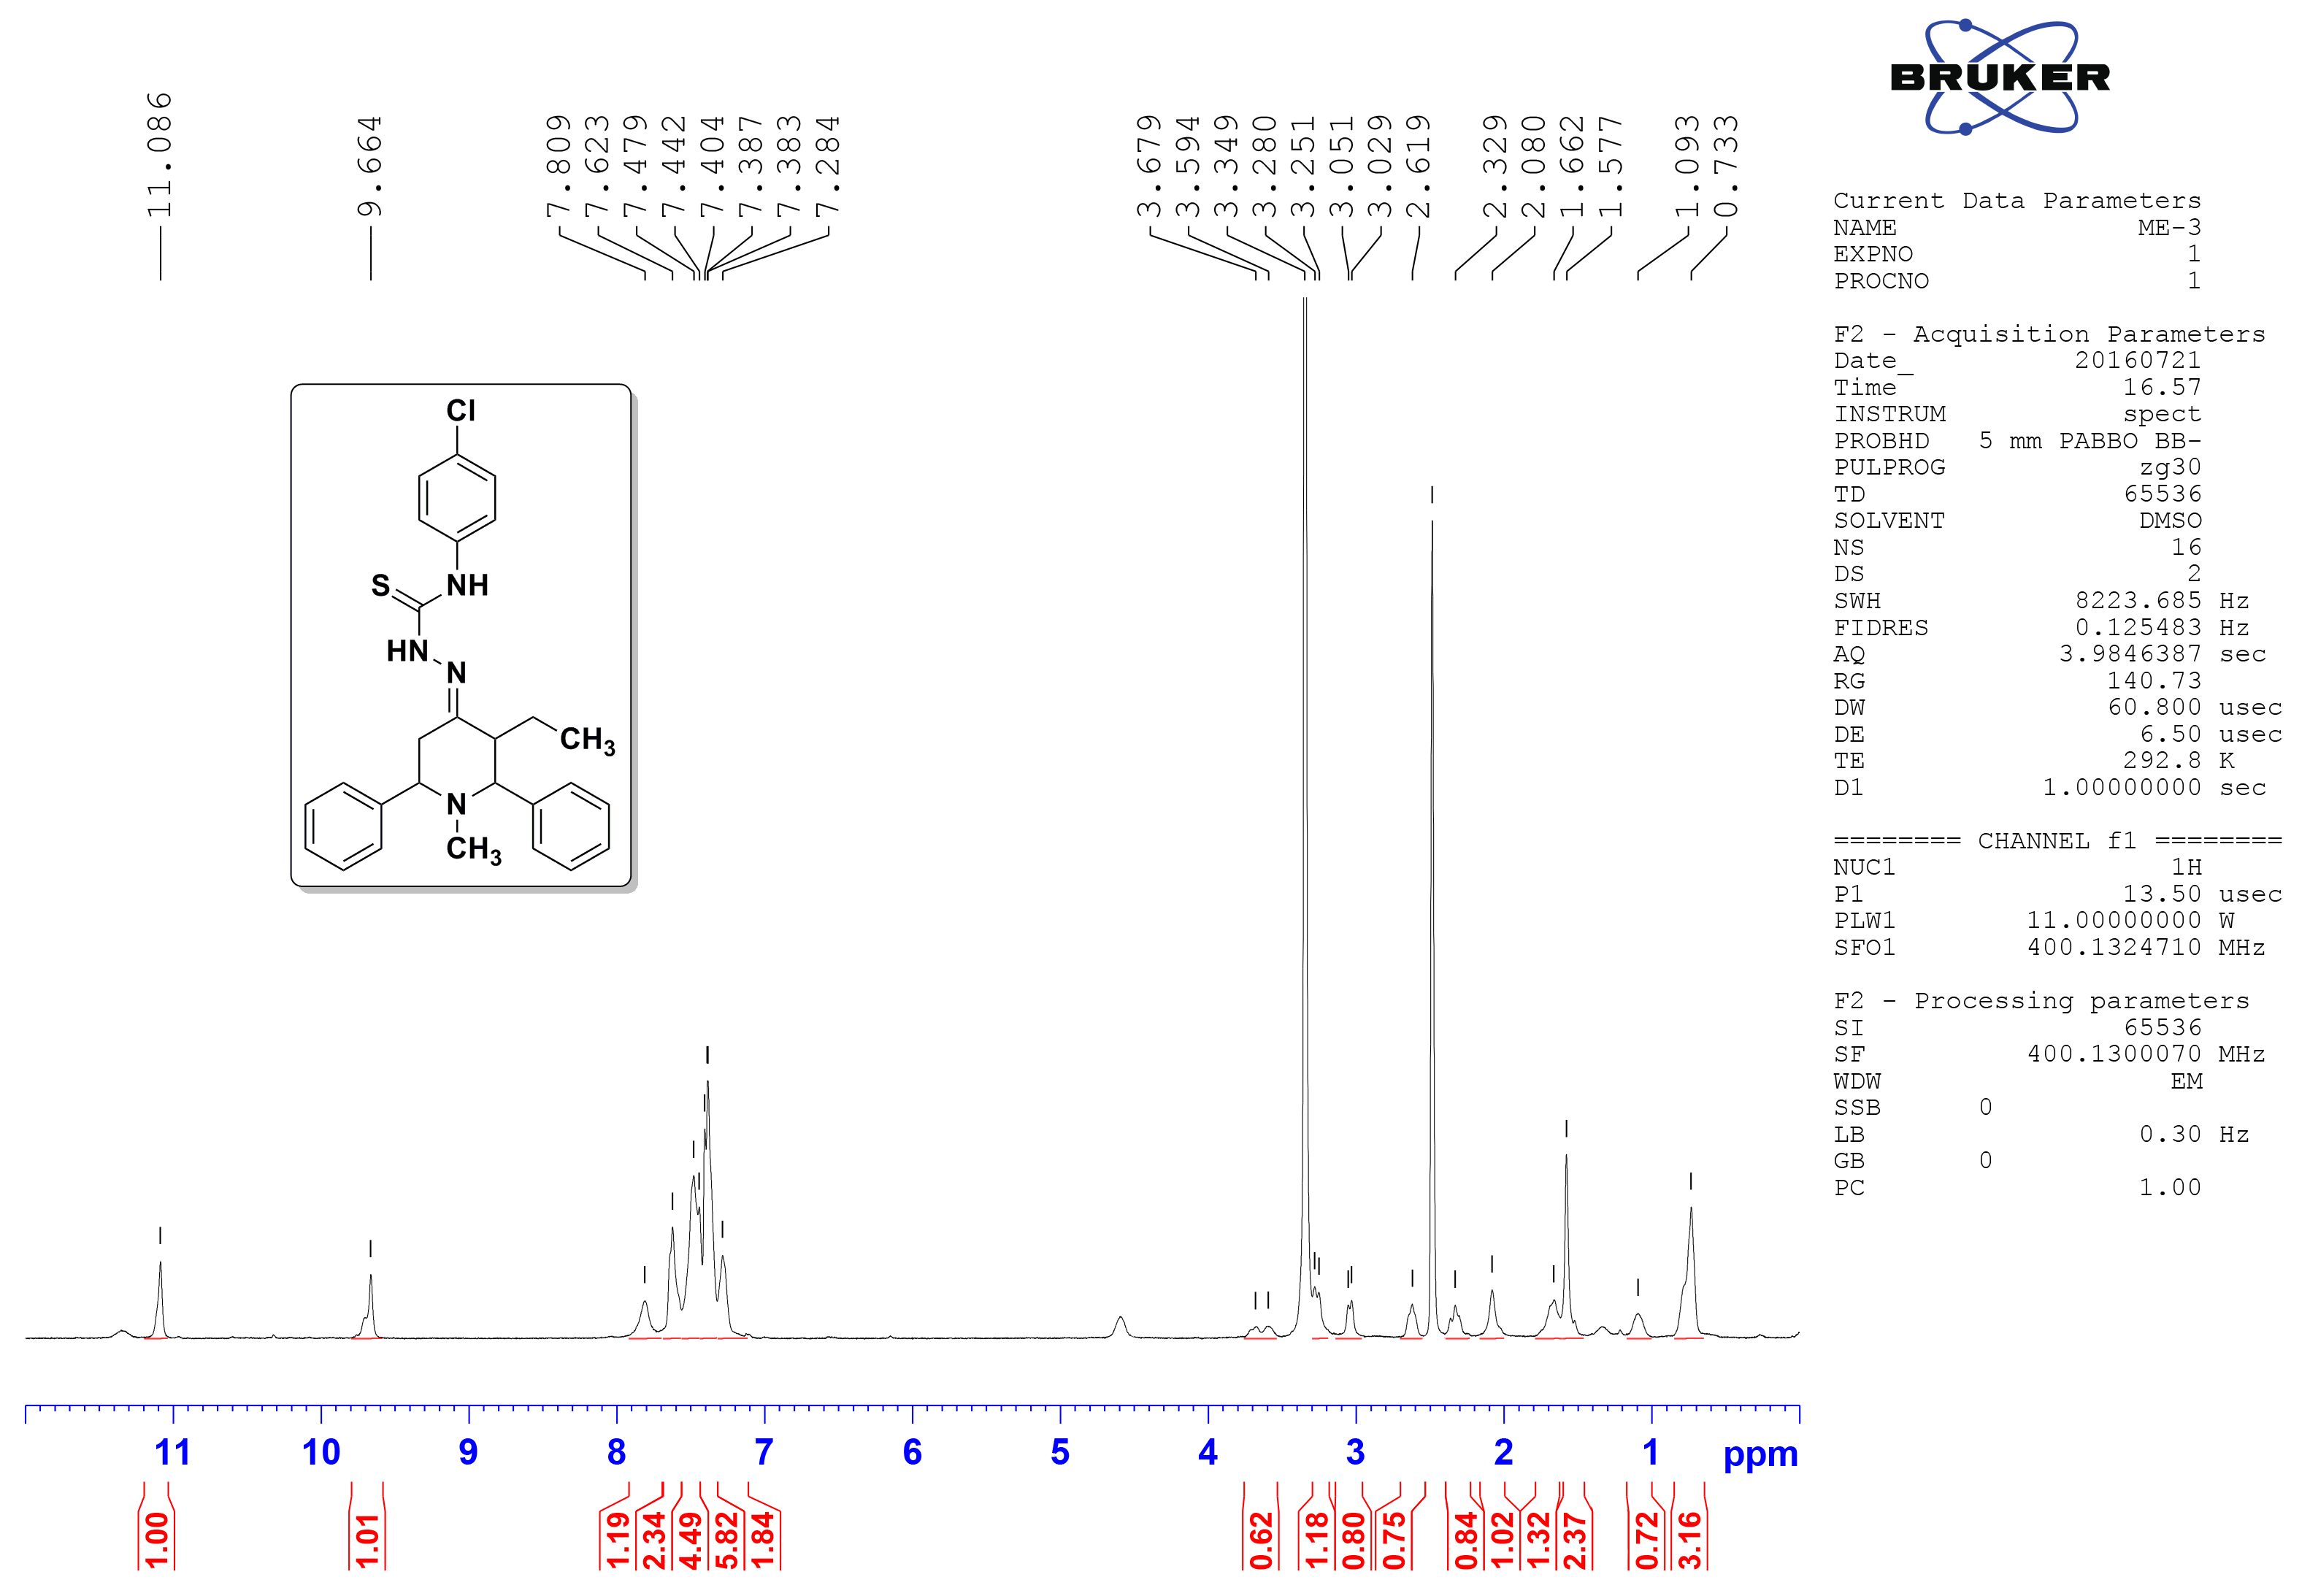
**

**Figure S 46:** 1H NMR of compound **12**

**
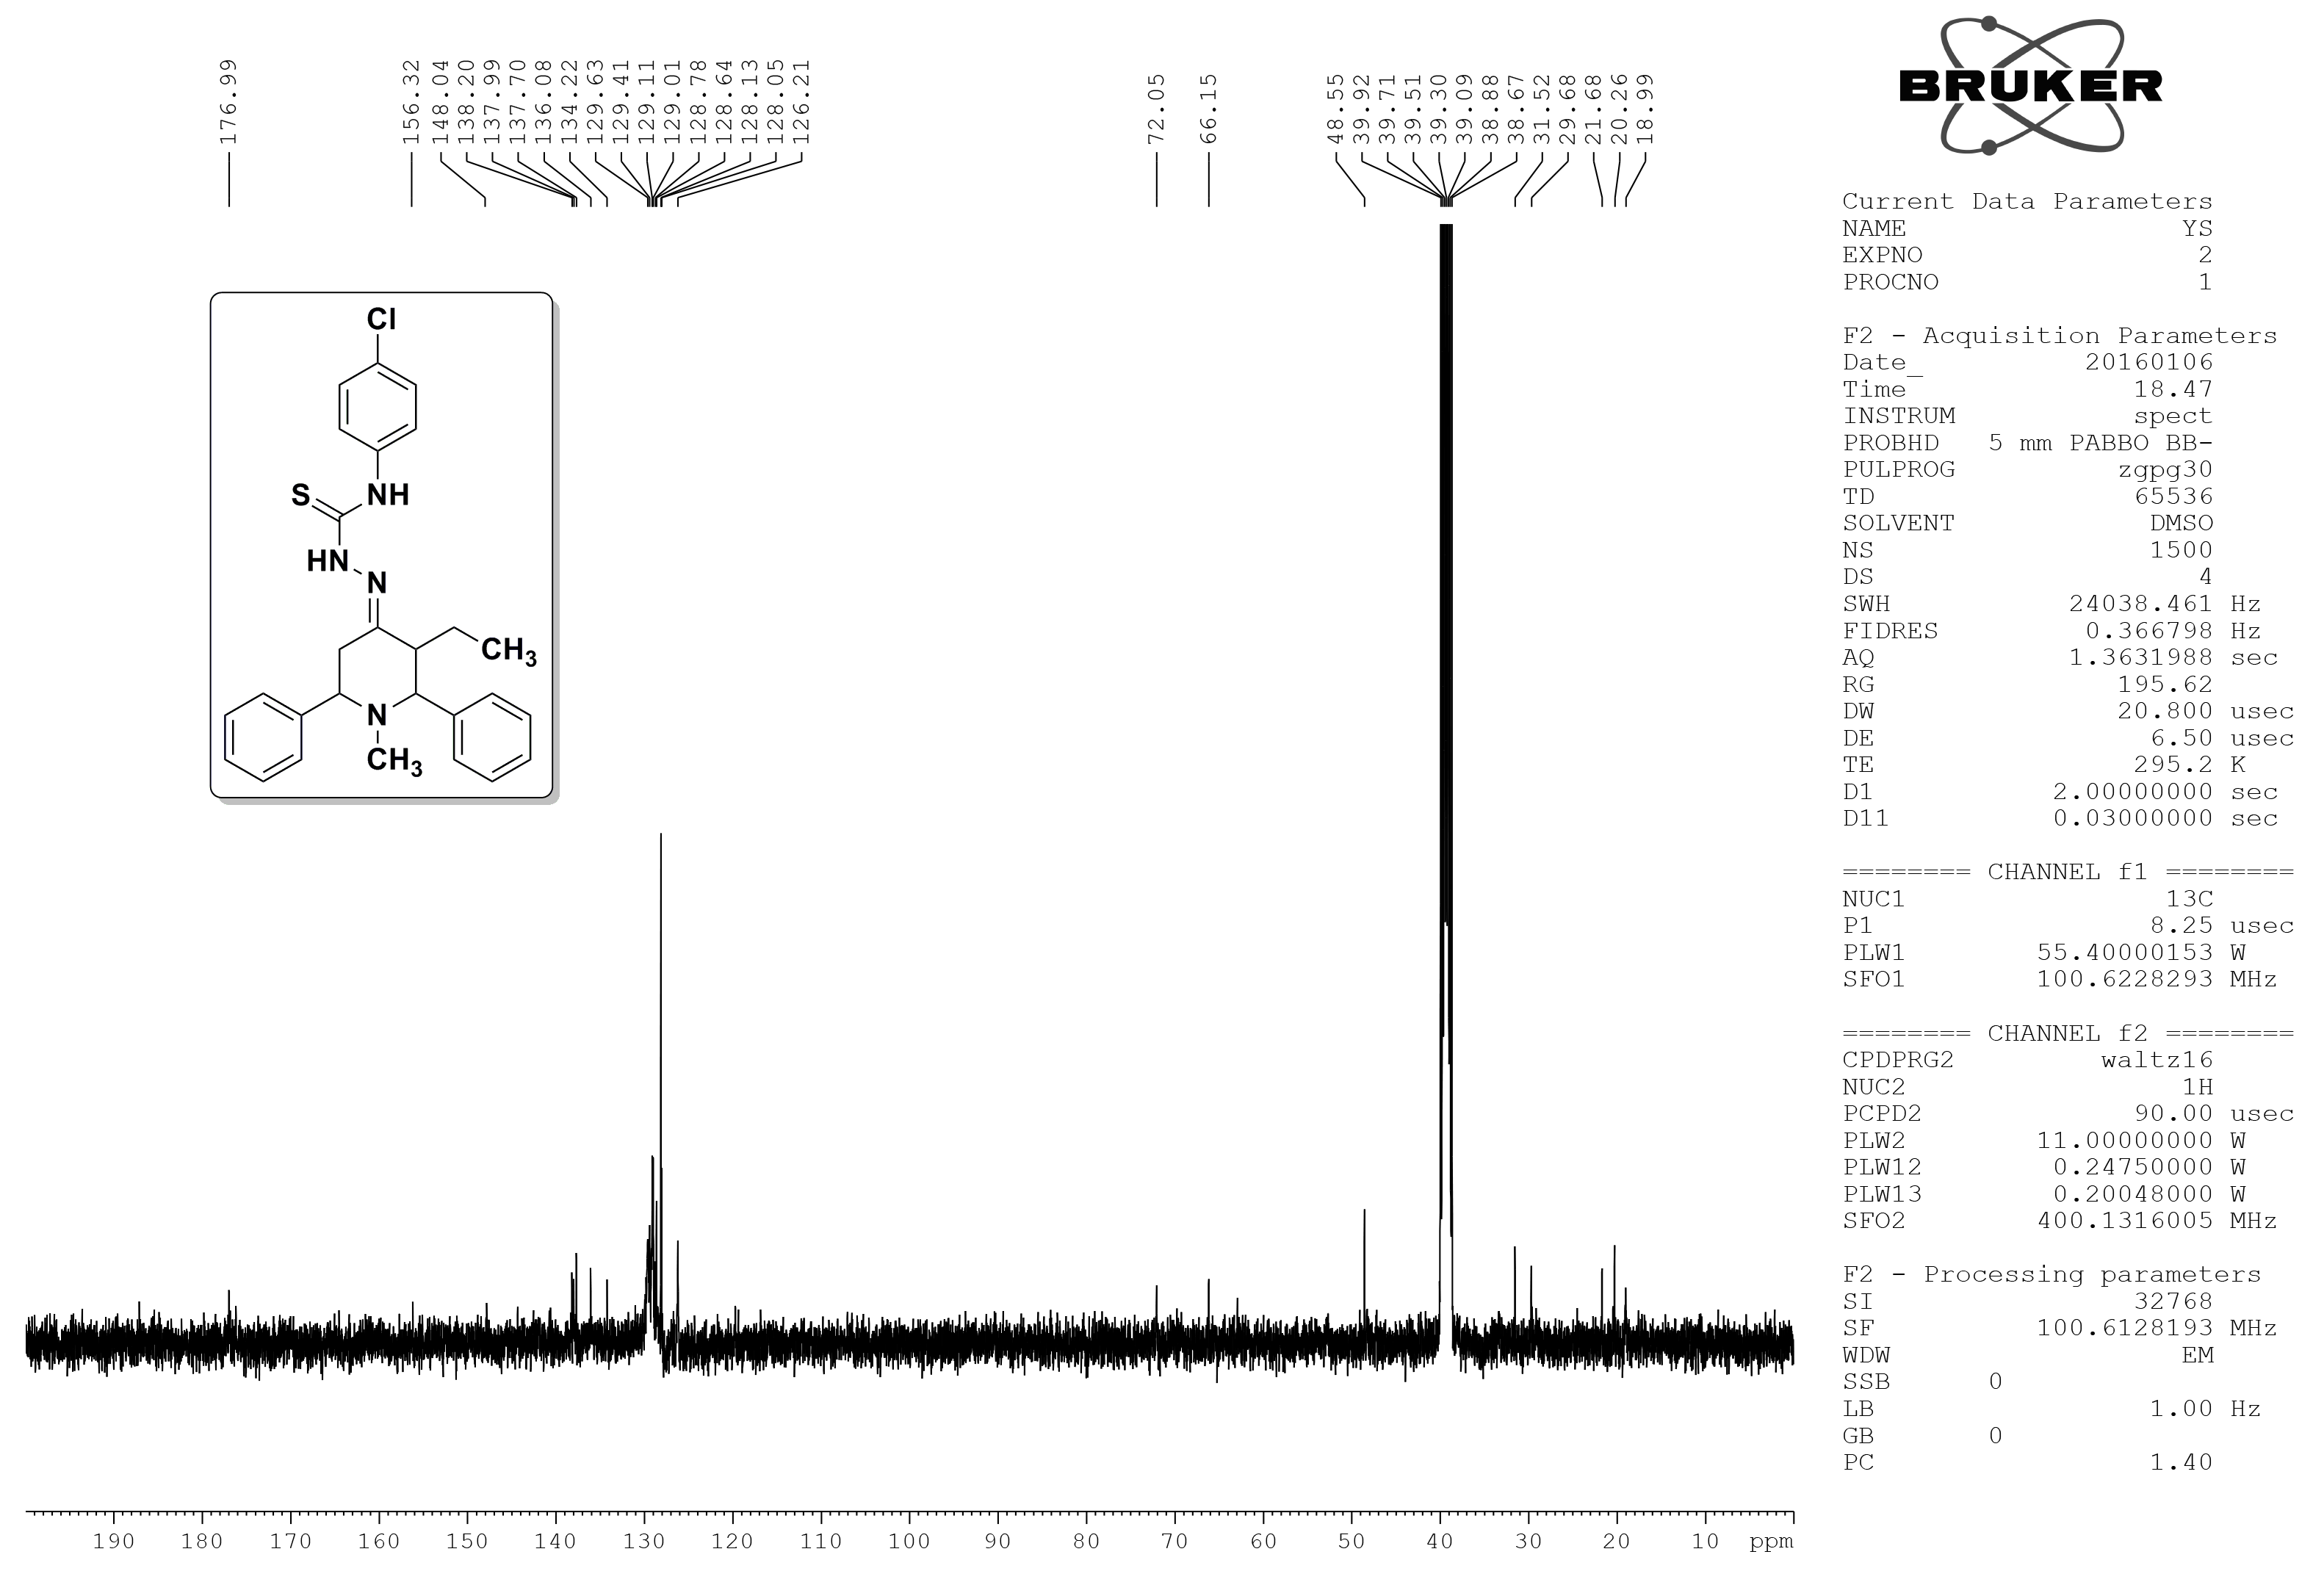
**

**Figure S 47:** 13C NMR of compound **12**


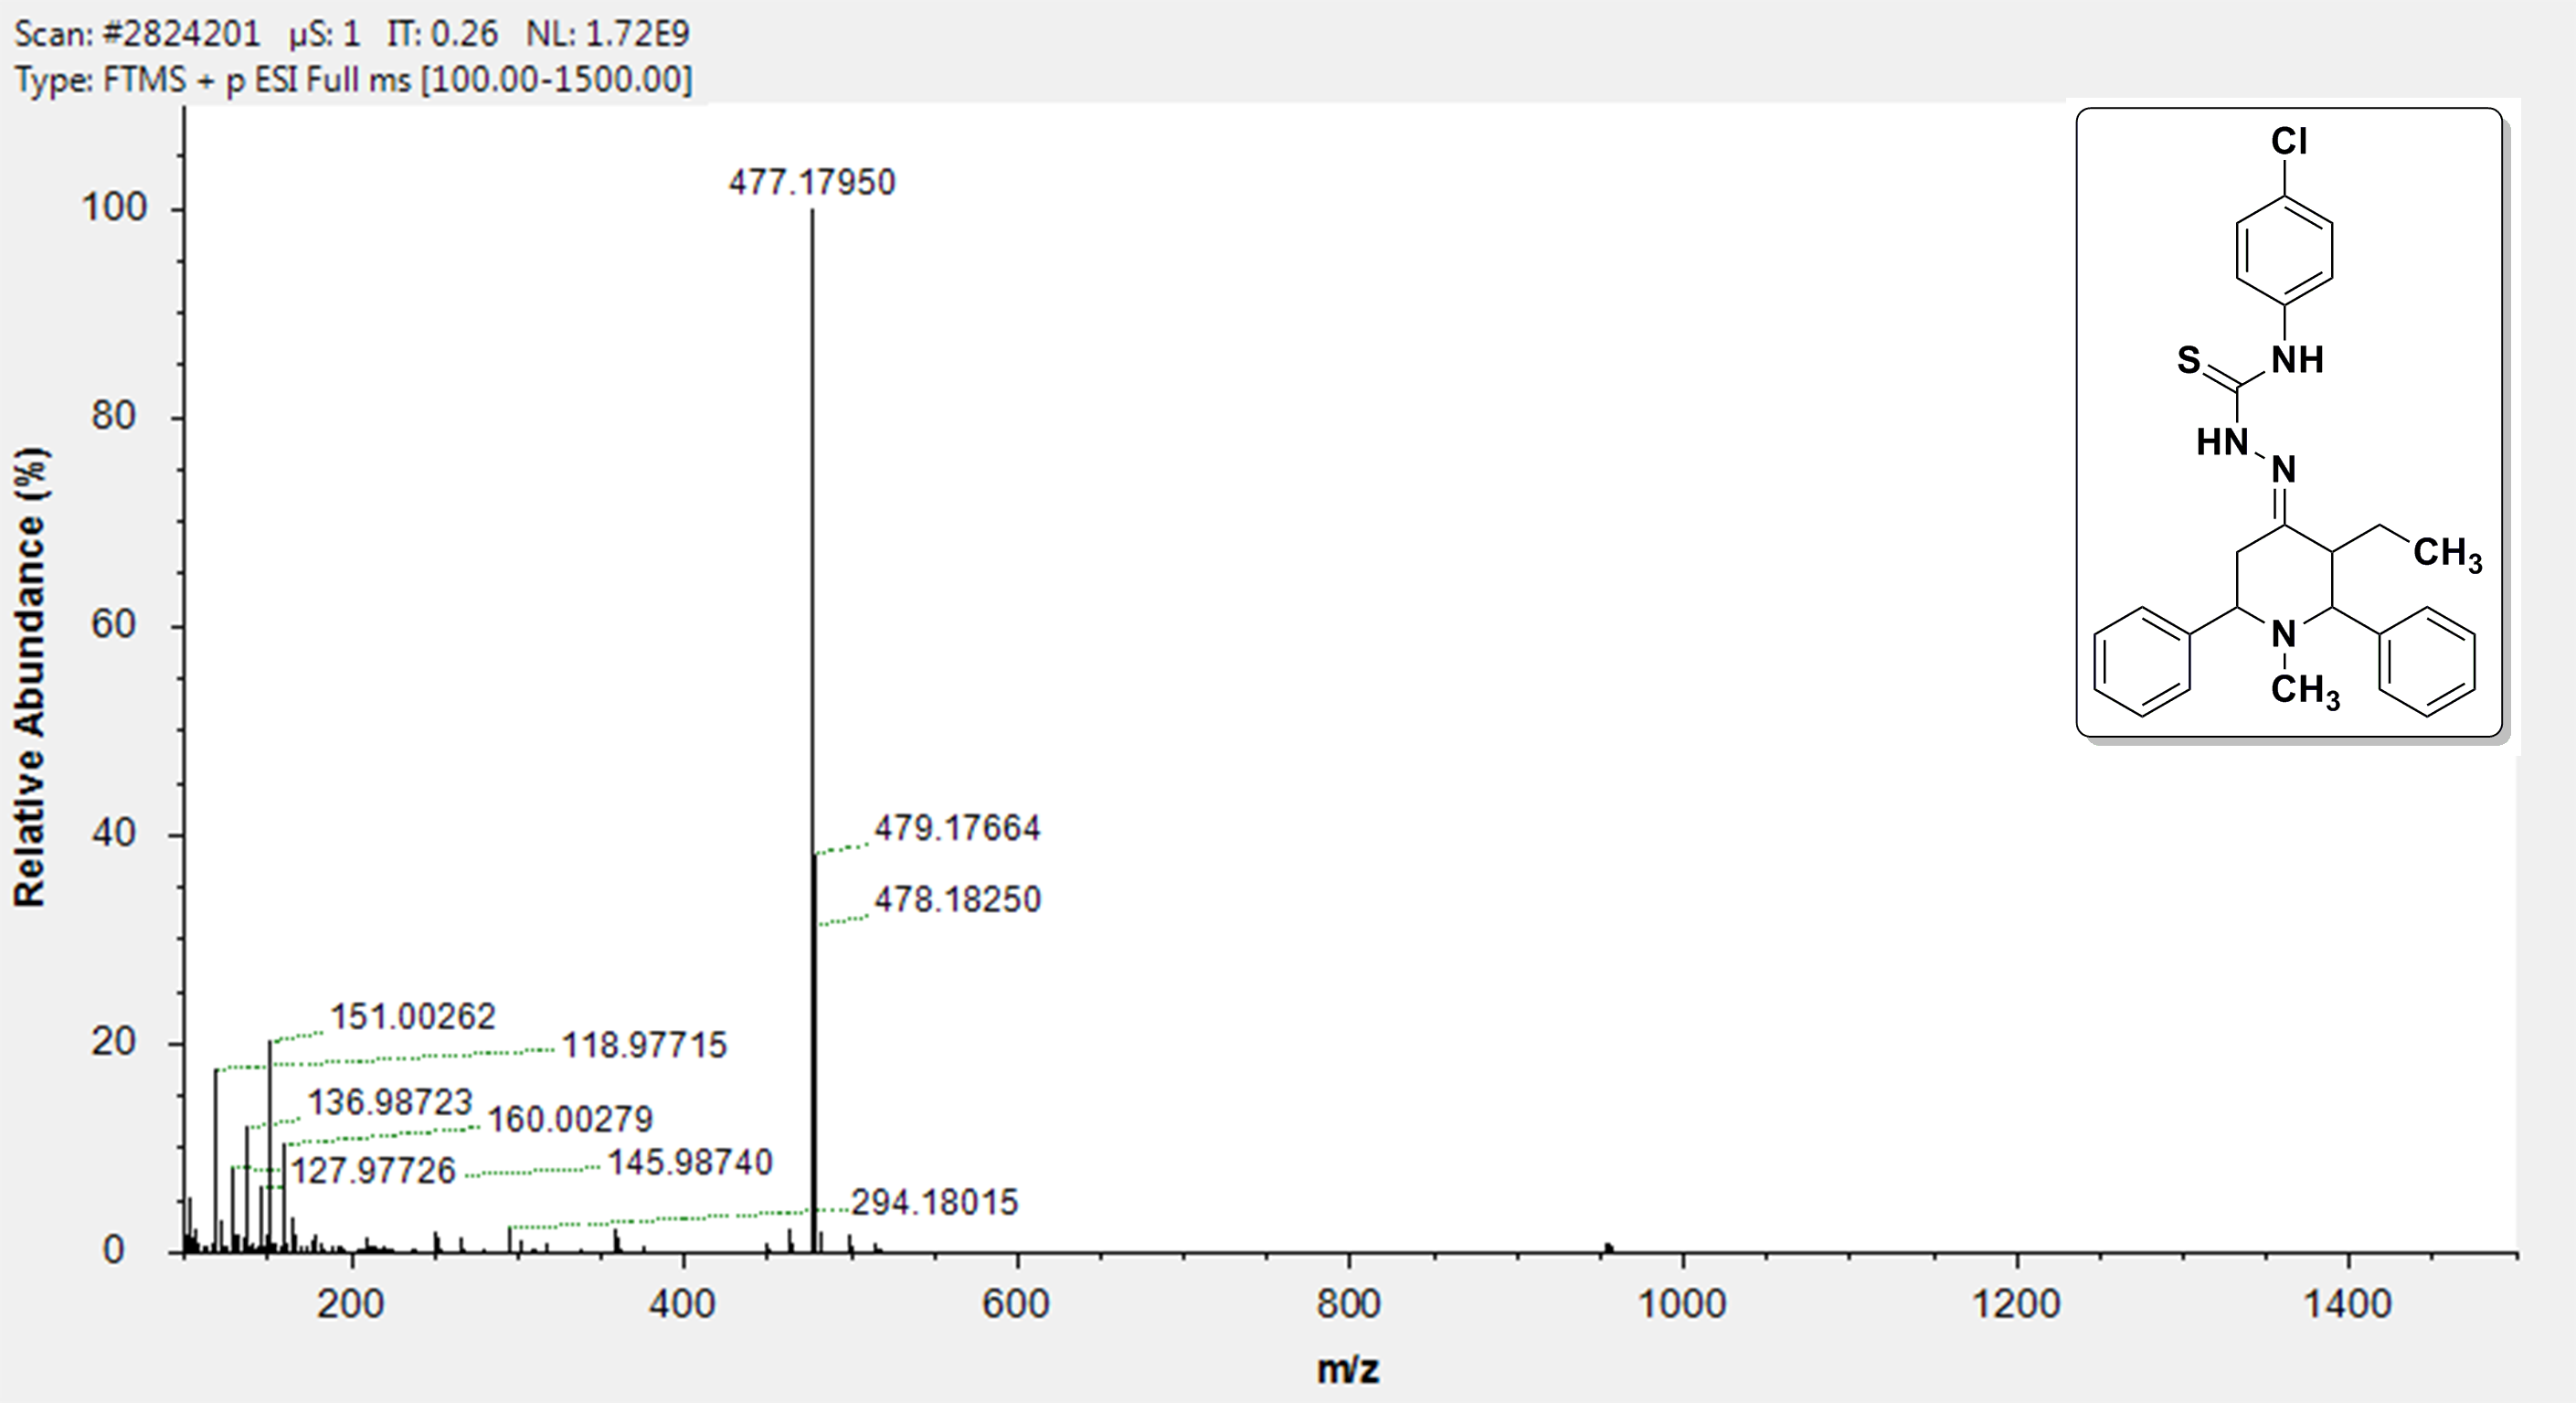


**Figure S 48:** Mass spectrum of compound **12**

**
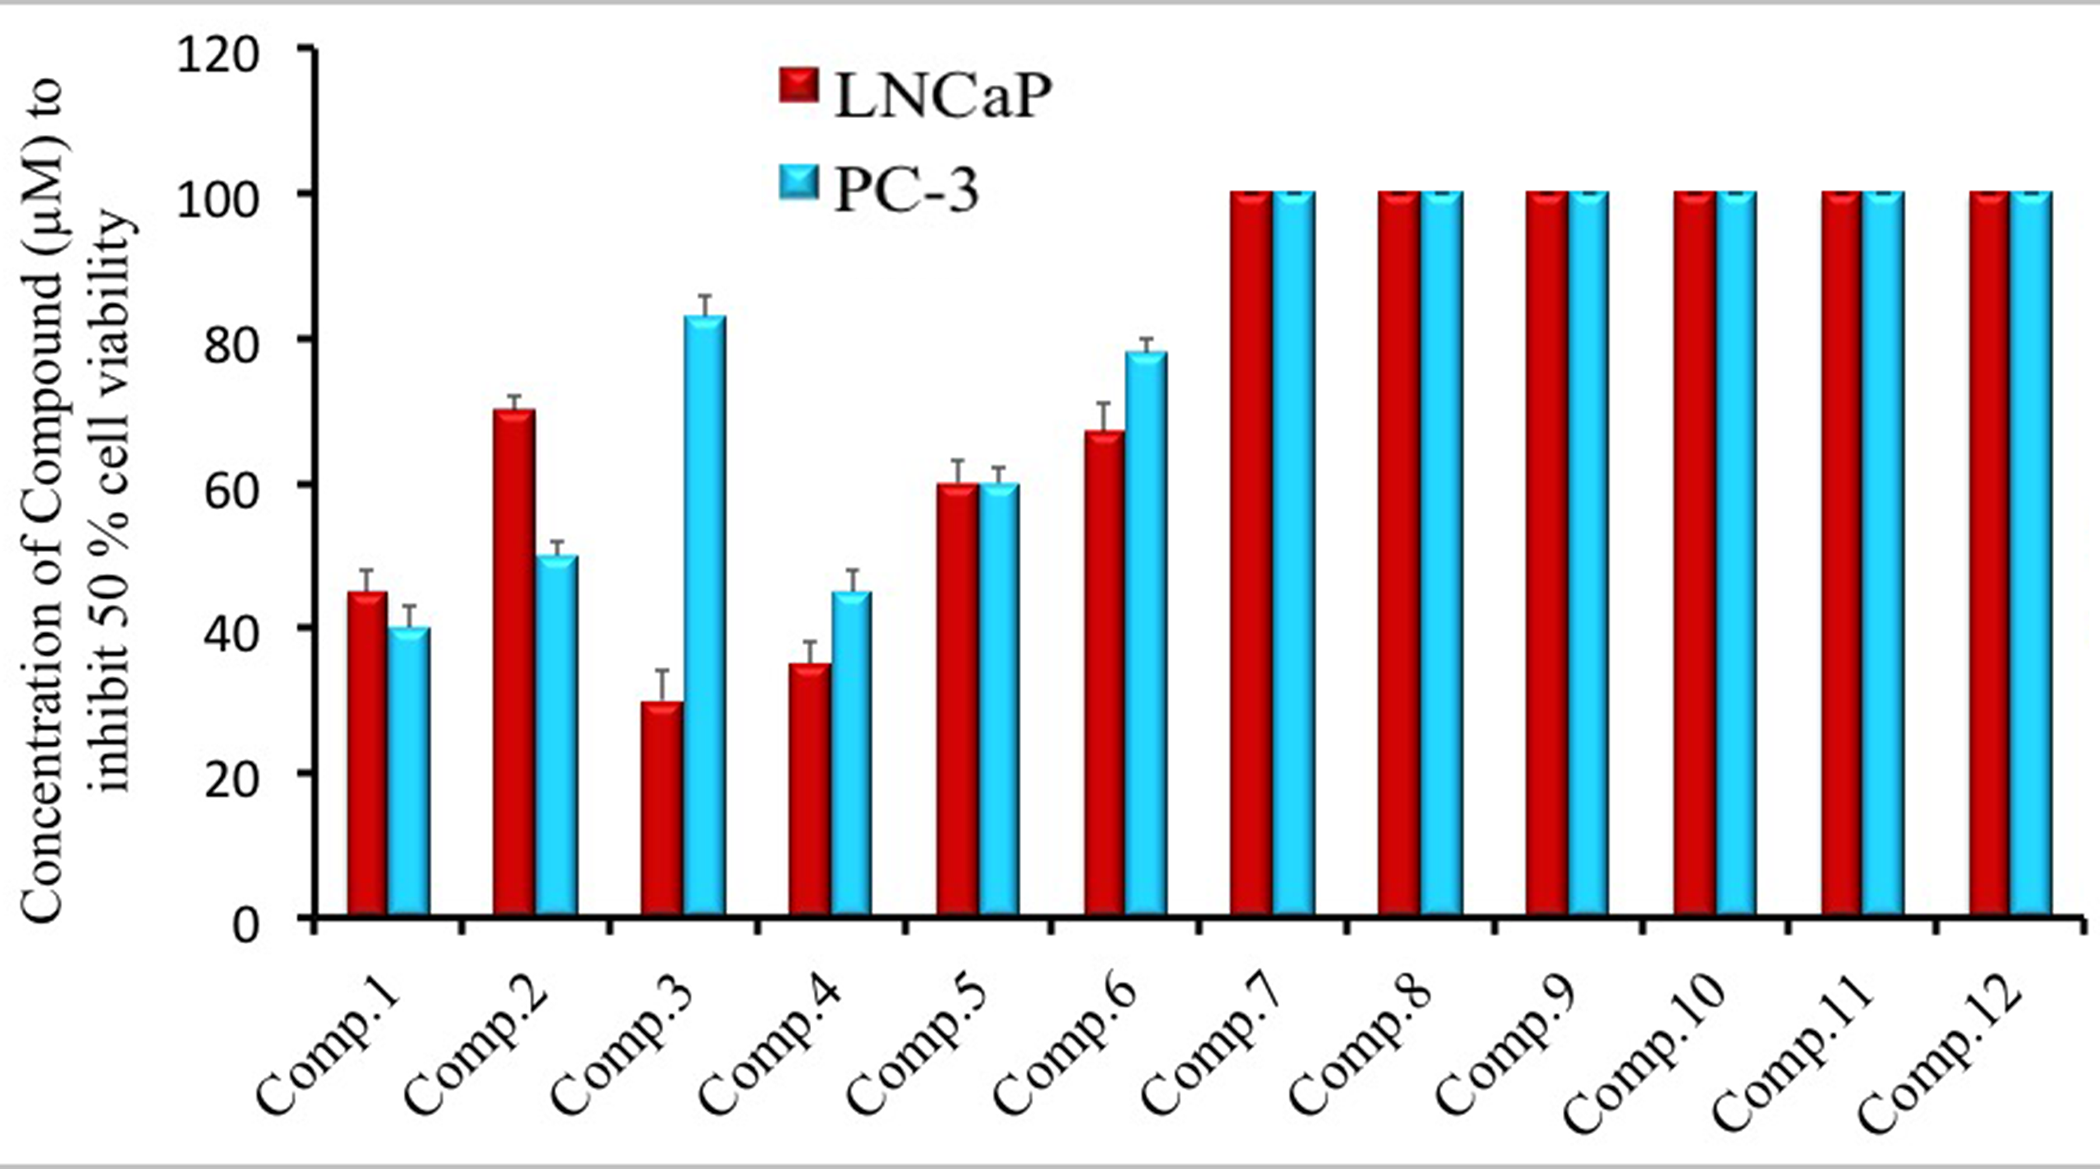
**

**Figure S 49:***IC50* range of compounds **1**-**12** against LNCaP and PC-3 prostate cancer cell lines

**
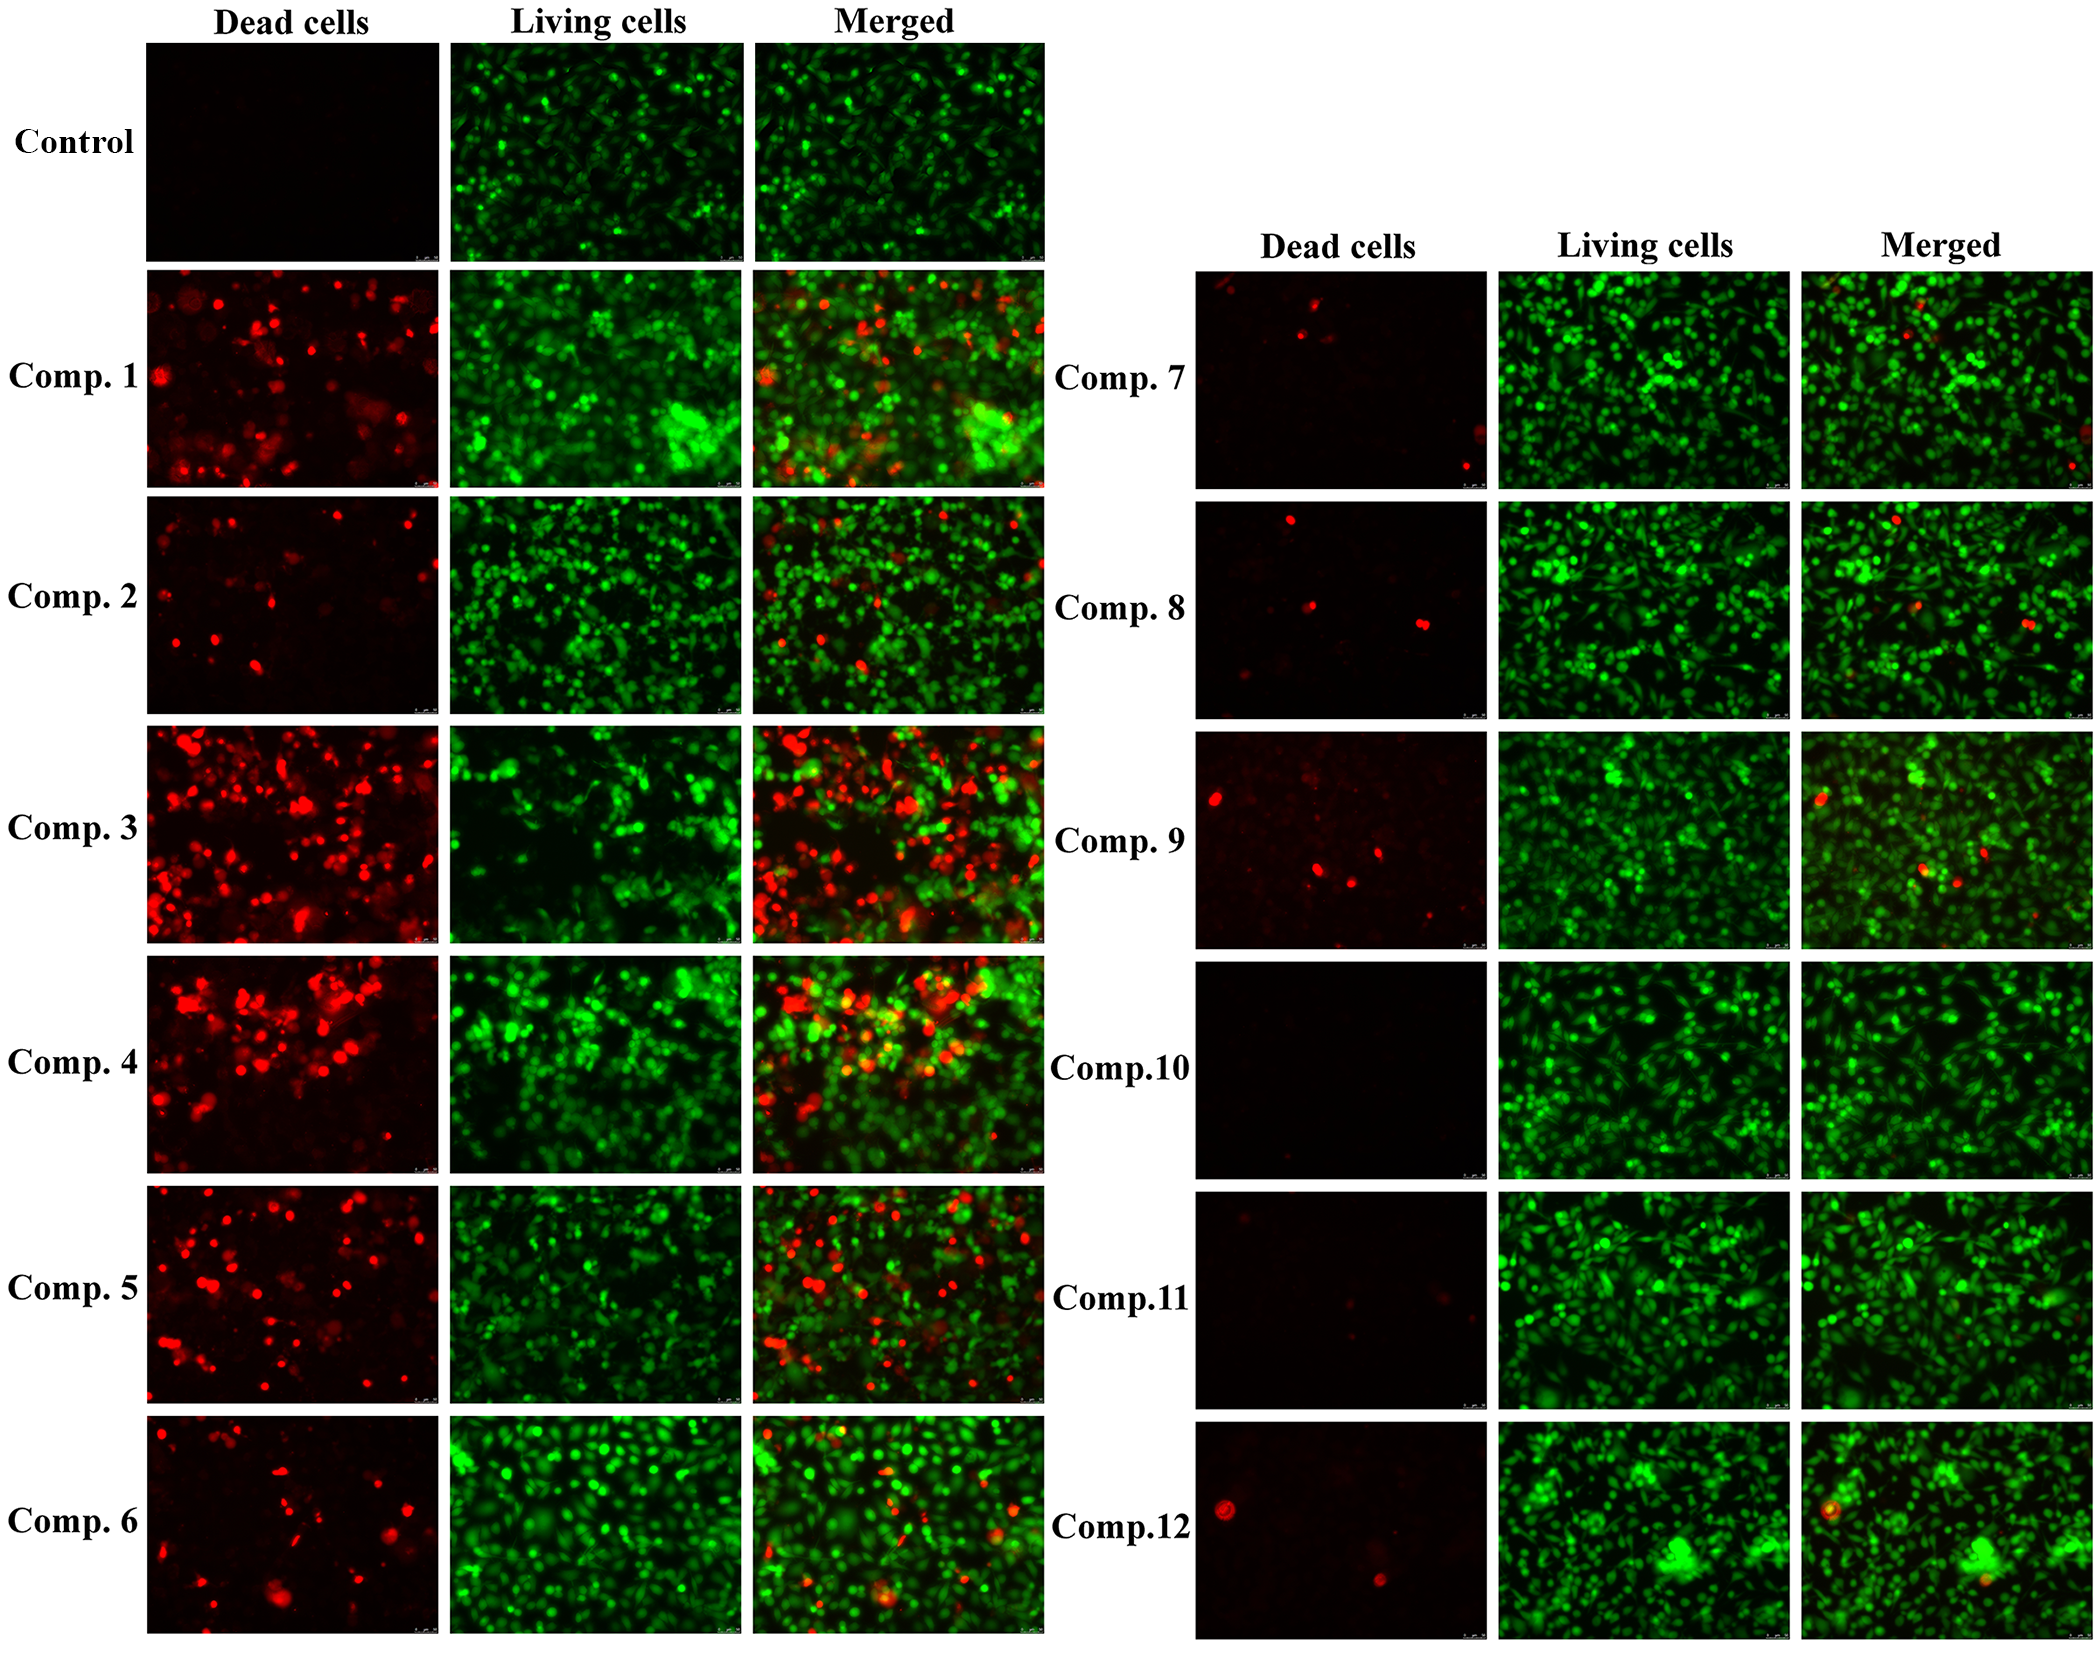
**

**Figure S 50:** Apoptotic characteristics of compounds **1**-**12** in LNCaP cell lines analyzed by live/dead assay viewed under fluorescence microscope

**
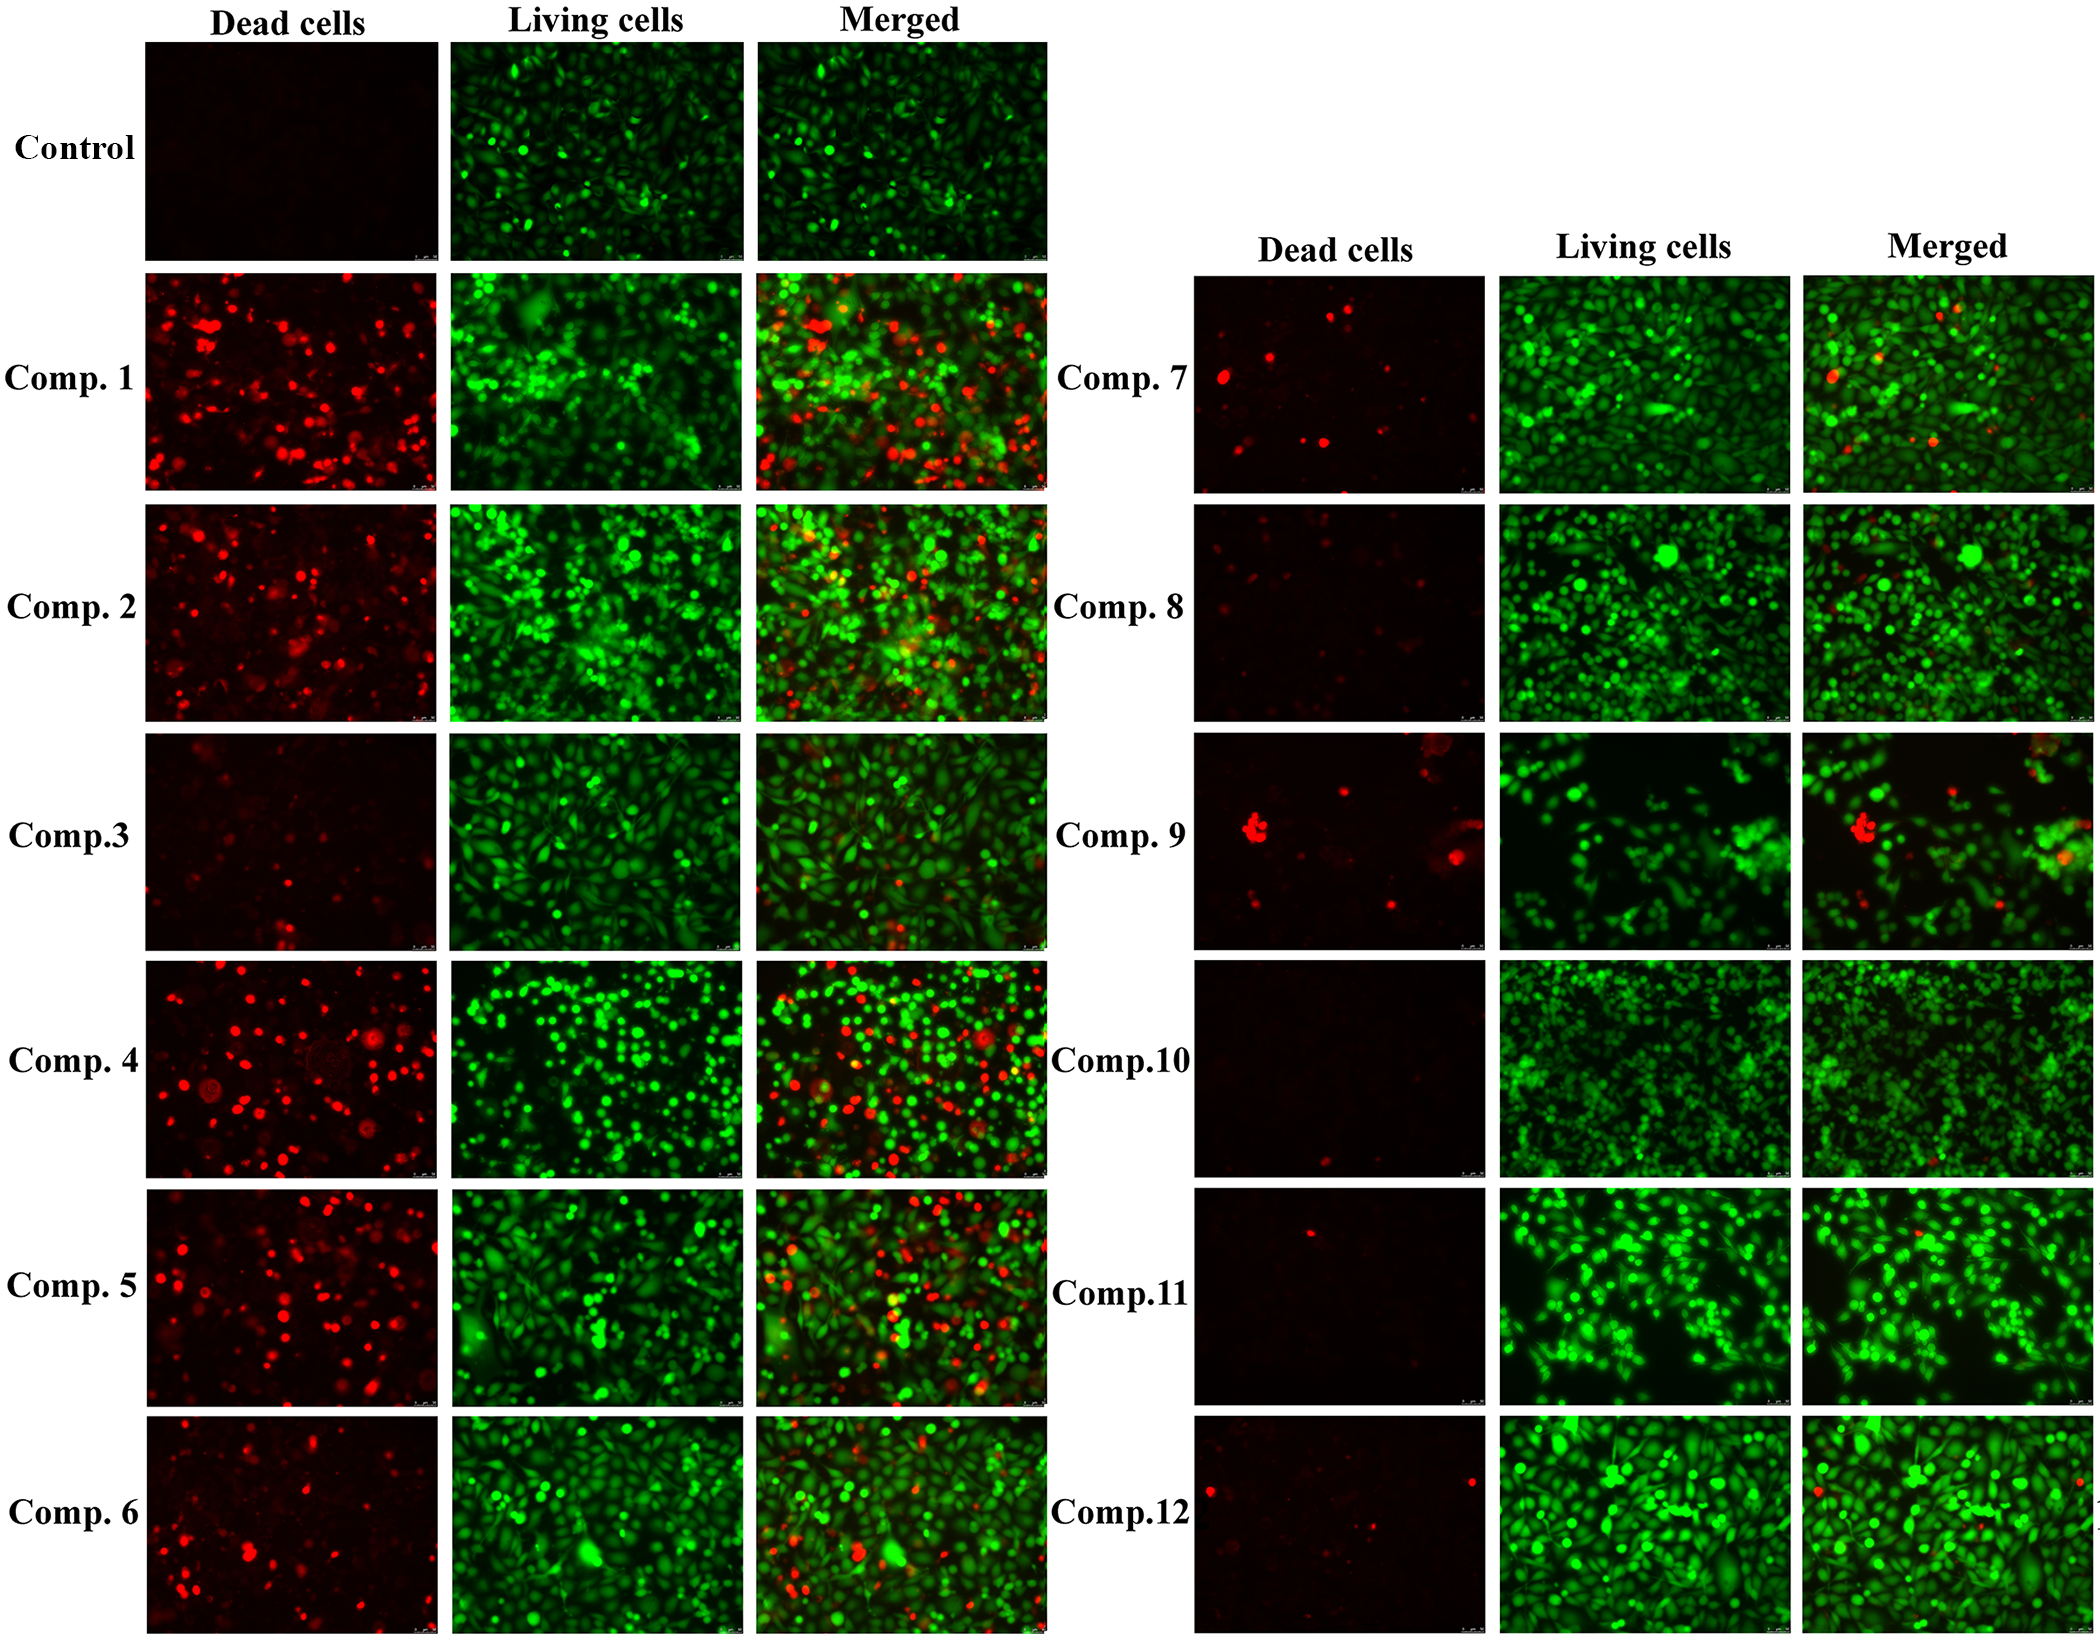
**

**Figure S 51:** Apoptotic characteristics of compounds **1**-**12** in PC-3 cell lines analyzed by live/dead assay viewed under fluorescence microscope

**
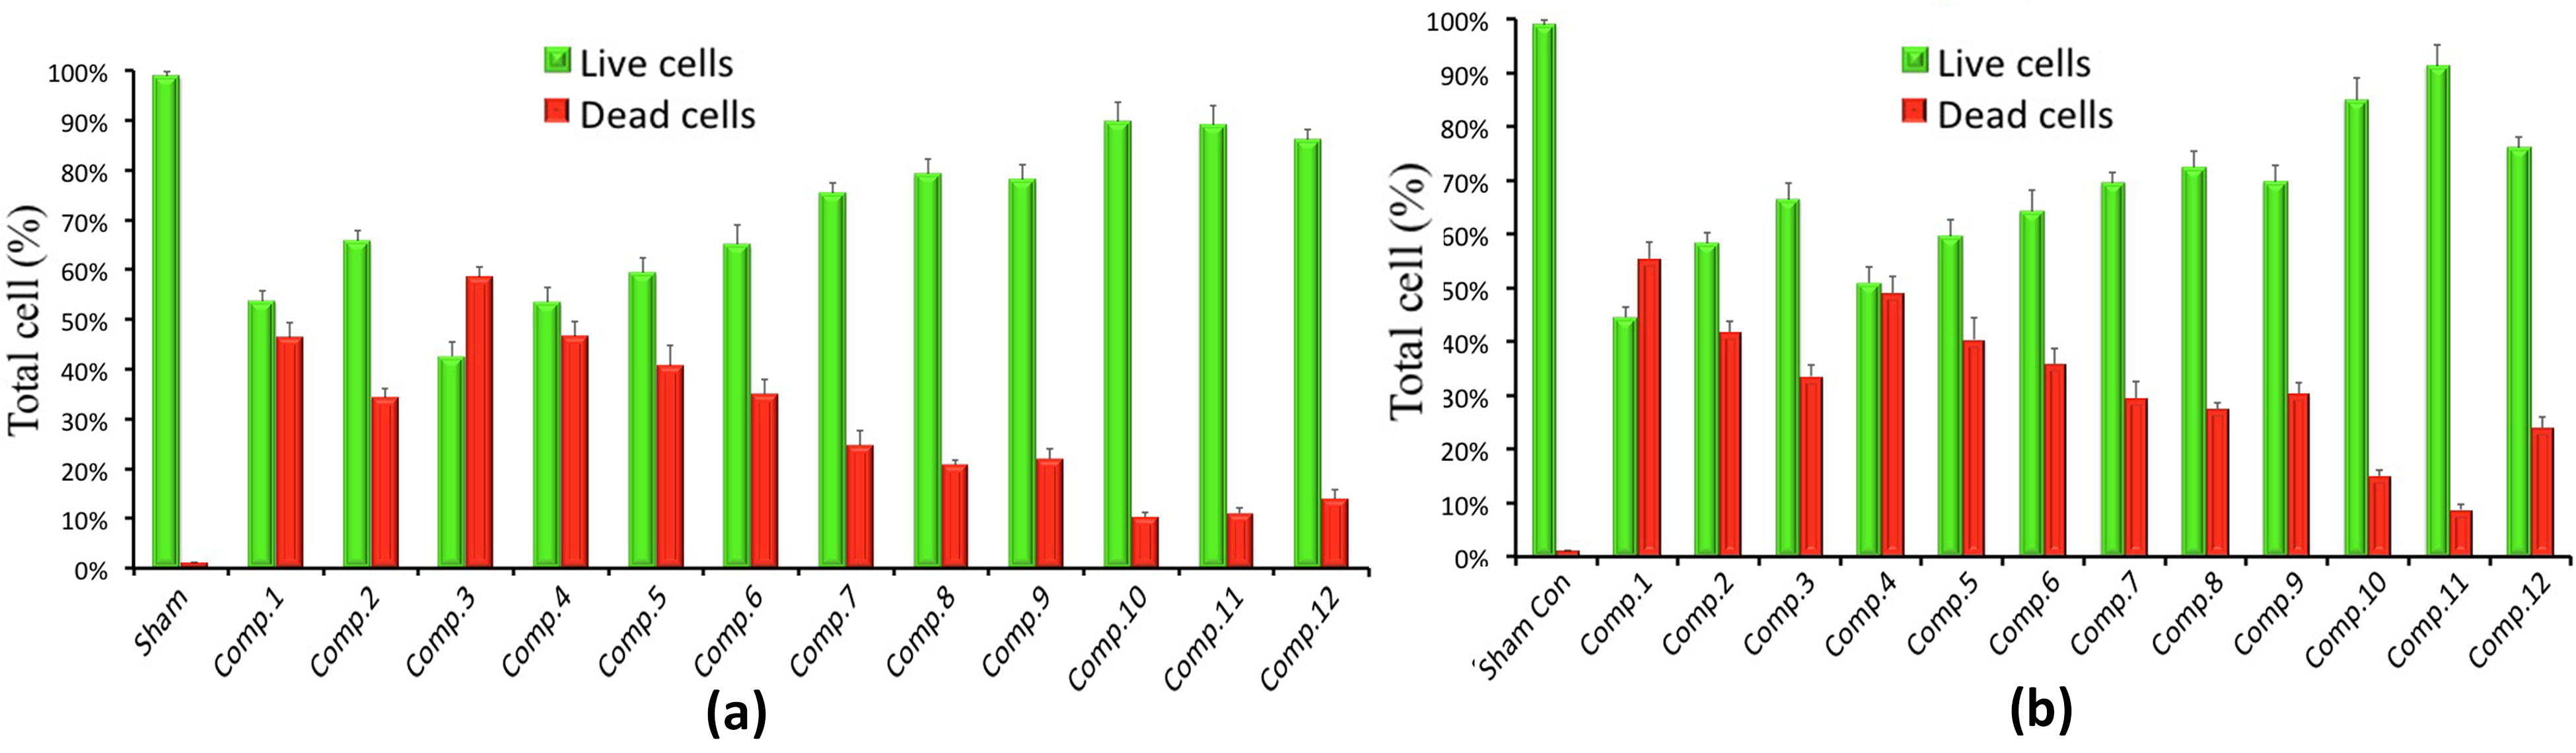
**

**Figure S 52:** Percentage of live/dead cells on the treatment of compounds **1**-**12** with (a) LNCaP and (b) PC-3 cell lines evaluated using live/dead assay

**Table S 1:** *In vitro* anticancer activities of compounds **1**-**12**

| **Comp.** | **IC50 (µM)** | | **Cell death (%)** | |
| --- | --- | --- | --- | --- |
| **LNCaP** | **PC-3** | **LNCaP** | **PC-3** |
| **1** | 45.1±3 | 40.3±3 | 46±2 | 55±3 |
| **2** | 70.3±3 | 50.4±2 | 34±1 | 42±5 |
| **3** | 30.4±4 | 83.2±3 | 58±3 | 34±2 |
| **4** | 35.2±3 | 45.6±3 | 47±2 | 49±4 |
| **5** | 60.3±2 | 60.6±3 | 41±3 | 40±3 |
| **6** | 67.4±2 | 80.5±4 | 35±2 | 36±2 |
| **7** | Not attained | Not attained | 25±4 | 30±5 |
| **8** | Not attained | Not attained | 21±2 | 28±6 |
| **9** | Not attained | Not attained | 22±1 | 30±4 |
| **10** | Not attained | Not attained | 10±1 | 15±3 |
| **11** | Not attained | Not attained | 11±1 | 9±1 |
| **12** | Not attained | Not attained | 14±1 | 24±1 |
